# Supplementary material for: Cross-Culture Adaptation and Psychometric Properties of the DrInC Questionnaire in Tanzanian Swahili
Source: Front Public Health. 2018 Nov 20;6:330. doi: 10.3389/fpubh.2018.00330 (PMC6255945; doi:10.3389/fpubh.2018.00330)
Supplement: Supplementary file 1 [file Data_Sheet_1.CSV]

	study_id	alcohol_6h_ainjury	pos_etoh	etoh_amount	family_present	family_consent	family_enrolled	family_sid	enroll_date	female	age	complaint	improve_health___0	improve_health___1	improve_health___2	improve_health___3	improve_health___4	improve_health___5	improve_health___6	improve_health___7	improve_health___89	improve_health_other	screening_demographics_complete	consumption	how_often_drink	number_drinks_day	how_often_6_more_drinks	how_often_cant_stop_drinking	fail_expectation_bc_drinking	how_often_drink_morning	how_often_guilt_postdrinking	how_often_no_memory_postdrinking	drinking_injured_you_or_someone	others_concerned_your_drinking	audit_b11	audit_complete	age_1st_drink	age_12ormore_drinks_yr	times_one_drink	times_5ormore_drinks	times_drunk	number_drinks_b4_drunk	number_drinks_perday	largest_number_drinks	other_year_drank_more	often_drank_drink_yr	daily_drink	drinking_interferes	drinking_arguments
2	2	0	1	0.3	1	1	1	3	7/20/16	male	31	Involved in a mining accident and sustained # right toe	1	0	0	0	1	0	0	1	0		2	2	2	3	2	2	0	0	2	0	4	0	23	2	21	997	4	4	7	3	5	7	NA	4	7	1	1
3	3	0	0	NA	1	1	1	3	7/22/16	male	56	HEAD INJURY DUE TO SHOT GUN	1	1	1	1	1	1	1	1	0		2	2	4	1	0	0	0	0	0	0	0	0	15	2	16	16	1	6	7	3	4	4	NA	1	4	5	5
4	4	0	0	NA	1	1	1	5	7/26/16	male	37	INVOLVED IN MOTORCYCLE ACCIDENT AND SUSTAINED #RIGHT AND # ON ARM	1	1	0	0	0	1	1	0	0		2	1	NA	NA	NA	NA	NA	NA	NA	NA	0	0	0	2	17	999	7	NA	NA	999			NA	2	2	5	5
6	6	0	0	NA	1	1	1	7	7/27/16	male	52	HISTORY OF MTA AND SUSTAINED ABDOMINAL INJURY	1	1	0	0	1	0	0	0	0		2	2	3	0	0	0	0	0	0	0	0	2	13	2	23	21	4	7	7	2	2	8	1	4	2	5	5
7	7	0	0	NA	1	1	1	8	7/28/16	male	20	CHEST INJURY DUE TO STUB WOUND BY KNIFE	1	1	1	0	1	1	1	1	0		2	1	NA	NA	NA	NA	NA	NA	NA	NA	0	2	2	2	12	16	3	9	9	999	4	4	9	2	3	5	5
8	8	0	0	NA	1	1	1	9	7/29/16	male	33	MTA # LEFT FEMUR	1	1	1	0	1	1	1	1	0		2	1	NA	NA	NA	NA	NA	NA	NA	NA	2	2	4	2	14	14	9	9	9	2	4	4	9	2	4	5	5
9	9	0	0	NA	1	1	NA	10	7/30/16	male	33	INVOLVED IN MTA AND SUSTAINED MULTIPLE INJURIES RT THIGH, RT KNEE AND HEAD	1	1	0	0	1	1	0	0	0		2	1	NA	NA	NA	NA	NA	NA	NA	NA	0	0	0	2	26	997	7	NA	NA	2			NA	5	3	5	5
10	10	0	0	NA	1	1	1	10	7/31/16	male	53	FALL DOWN FROM THE TREE AND SUSTAINED # FEMUR	1	1	0	0	0	0	0	0	0		2	2	3	1	3	0	0	0	0	0	0	0	15	2	23	23	4	7	7	3	3	3	2	4	3	5	5
11	11	0	0	NA	1	1	1	12	8/1/16	female	52	FALLING DOWN AND SUSTAINED # RIGHT LEG	1	1	0	0	1	1	0	0	0		2	2	4	0	0	0	0	0	0	0	0	0	12	2	10	999	2	7	7	2	2	2	2	2	2	5	5
12	12	0	0	NA	1	1	1	13	8/6/16	male	26		1	1	1	0	1	1	1	1	0		2	2	3	1	1	1	0	0	0	0	0	4	16	2	16	16	4	4	9	4	4	6	1	4	4	5	5
13	13	0	0	NA	1	1	1	15	8/8/16	male	28	MTA-HEAD INJURY, CHEST, AND RIGHT THUMB	1	1	1	0	1	1	1	1	1	BE COOPERATIVE TO ALL PEOPLE	2	1	NA	NA	NA	NA	NA	NA	NA	NA	0	0	0	2	15	15	9	9	9	2	999	999	9	4	1	5	5
14	14	0	0	NA	1	0	0	16	8/8/16	male	43	INVOLVED IN MOTORCYCLE ACCIDENT AND SUSTAINED LEG INJURY	1	1	0	0	1	1	0	1	0		2	2	2	0	0	0	0	0	0	0	0	0	10	2	7	20	7	NA	NA	3			NA	2	4	5	5
15	15	1	0	NA	0	0	0	15	8/9/16	male	70	TO DRESS WOUND AND INJECTION OF ANT TETANUS TOXID AFTER FALLING DOWN	1	0	0	0	0	0	0	0	0		2	2	4	1	0	0	0	0	2	0	0	2	17	2	9	19	3	7	7	3	999	999	1	4	24	1	5
16	16	0	0	NA	1	1	1	17	8/9/16	female	22	INVOLVED IN BUDS ACCIDENT AND SUSTAINED # RT ARM	1	1	0	0	1	0	0	0	1	TO PRAY GOD	2	2	3	1	2	2	0	0	3	0	2	2	23	2	21	20	2	2	4	5	998	10	9	4	5	5	1
17	17	0	0	NA	1	1	1	18	8/11/16	male	25	HIT BY STONE IN THE MINE AND SUSTAINED HEAD INJURY	1	1	1	0	1	1	1	1	0		2	1	NA	NA	NA	NA	NA	NA	NA	NA	0	0	0	2	12	12	9	9	3	999	999	9	9	4	5	5	5
20	20	0	0	NA	1	1	1	21	8/12/16	male	80	CUT WOUND	1	1	1	1	1	1	1	1	0		2	2	3	0	1	0	0	0	3	3	0	0	15	2	30	30	4	5	6	3	3	5	2	3	3	1	5
21	21	1	0	NA	1	1	1	21	8/13/16	male	22	INVOLVED IN MOTORCYCLE ACCIDENT AND SUSTAINED INJURY RT KNEE JOINT	1	1	0	0	1	1	0	0	0		2	2	3	0	0	0	2	0	0	1	0	0	14	2	13	19	4	7	7	2	998	998	9	4	998	5	5
22	25	0	0	NA	1	1	1	23	8/15/16	male	30	Head injury - assault	1	1	1	1	1	1	1	1	0		2	2	1	0	1	0	0	0	0	0	0	0	8	2	20	20	5	8	9	1	1	1	1	5	1	5	5
23	26	0	0	NA	1	1	1	25	8/16/16	female	58	Right leg injury from fall	1	1	1	1	1	1	1	1	0		2	2	1	0	0	0	0	0	0	0	0	0	10	2	20	20	5	6	9	2	2	2	2	6	5	5	5
24	27	0	0	NA	0	0	0	NA	8/16/16	male	47	Lower limb injury after falling from tree	1	1	0	0	1	1	0	1	0		2	2	3	1	0	2	0	0	2	0	0	0	16	2	15	997	3	7	7	2	2	2	2	3	2	5	5
25	28	0	0	NA	1	1	1	24	8/16/16	male	19	Right leg injury from MCC	1	1	0	0	1	0	0	0	0		2	2	2	0	0	0	0	0	1	0	0	0	11	2	18	19	2	7	7	10	1	2	NA	2	1	5	5
26	29	0	0	NA	1	1	1	27	8/17/16	male	28	Head Injury - MTC	1	1	0	0	1	0	0	1	1	Medicine	2	2	3	0	1	3	0	0	3	3	0	0	21	2	10	12	NA	3	NA	3		7	1	3	3	1	1
27	30	0	0	NA	1	1	1	26	8/17/16	male	46	Head Injury - MTC	1	1	1	0	1	1	1	1	1	Positive attitude and good hygeine	2	2	2	1	1	0	0	0	3	4	4	0	22	2	15	20	3	3	4	3	3	6	1	3	4	5	1
31	34	0	0	NA	1	1	1	2	8/19/16	male	48	Right leg injury from MCC	1	1	0	0	1	0	0	0	0		2	1	NA	NA	NA	NA	NA	NA	NA	NA	0	2	2	2	24	997	7	NA	NA	3			NA	1	1	1	1
32	35	0	0	NA	1	1	1	30	8/21/16	male	51	Right leg injury from fall	1	1	1	1	1	1	1	1	0		2	2	3	0	0	0	0	0	0	0	2	0	13	2	20	20	4	9	9	1	1	1	2	NA		5	5
33	36	0	0	NA	0	0	0	36	8/22/16	male	23	Right leg injury from MCC	1	1	0	0	1	0	0	0	1	Get reassurance	2	1	NA	NA	NA	NA	NA	NA	NA	NA	0	0	0	2	15	997	6	7	7	999	999	999	2	6	999	5	5
34	37	0	0	NA	1	1	1	31	8/23/16	male	30	Leg injury after assualt	0	1	0	0	1	0	0	0	0		2	2	3	1	0	0	0	0	0	1	2	0	15	2	20	998	3	7	7	3	3	4	1	3	6	1	1
36	39	1	0	NA	0	0	0	NA	8/25/16	male	36	Head and abdominal injury after MVC	1	1	0	0	1	0	0	0	0		2	2	0	1	0	0	0	0	0	0	0	0	9	2	14	20	6	6	6	3	3	6	1	6	3	5	5
37	40	1	1	0.11	1	1	1	34	8/26/16	male	40	Clavicle fracture after fall from tree	1	1	0	0	1	0	0	0	0		2	2	3	1	0	2	0	0	0	0	0	0	15	2	20	22	2	4	7	999	998	998	2	7	3	1	5
39	42	1	0	NA	0	0	0	NA	8/30/16	male	32	Abdominal inury after assault	1	1	0	0	1	0	0	0	0		2	2	4	4	4	4	4	4	4	4	2	2	44	2	13	20	2	3	3	3	5	14	1	1	5	1	1
40	43	0	0	NA	1	1	1	36	8/31/16	male	23	Chest injury after MVC	1	1	0	0	1	0	0	0	0		2	2	1	0	0	0	0	0	0	0	0	0	9	2	21	997	6	7	7	1	1	1	2	6	999	5	5
43	46	1	0	NA	1	1	1	33	9/1/16	male	59	Spinal cord after fall	1	1	0	0	0	1	0	0	0		2	2	4	0	0	0	0	0	0	1	0	0	13	2	15	20	1	7	4	4 litres	998	5 litres	2	1	998	1	5
44	47	0	0	NA	1	1	1	42	9/9/16	female	28	Bilateral leg injuries from RTA - pedestrian	0	1	0	0	0	0	0	0	0		2	2	3	0	0	0	0	0	3	0	0	2	16	2	19	19	3	3	9	2	2	2	2	4	1	5	5
46	49	0	0	NA	0	0	0	NA	9/10/16	male	19	Head Injury - MTC	0	1	0	0	1	0	0	0	0		2	2	4	1	0	0	0	0	2	0	0	0	15	2	19	19	3	7	7	3	3	999	2	3	3	5	5
47	50	0	0	NA	0	0	0	NA	9/17/16	male	45	Arm injury from fall	0	1	0	0	1	0	0	0	0		2	2	3	1	4	0	0	2	3	0	0	0	21	2	10	20	3	4	4	3	4	6	2	3	4	5	1
48	51	0	0	NA	1	1	1	45	9/19/16	female	32	Head injury after fall	1	1	0	1	1	1	0	1	0		2	2	3	1	0	0	3	0	3	0	0	0	18	2	22	20	3	9	3	3	3	5	1	3	3	1	5
49	52	0	0	NA	0	0	0	NA	9/19/16	male	26	Right hip injury from MTC	0	1	0	0	1	1	0	0	0		2	2	4	1	3	0	0	3	0	4	4	2	29	2	18	19	3	4	3	2	4	998	1	2	5	1	1
51	54	1	0	NA	1	1	1	47	9/20/16	female	35	MTA--HEAD INJURY	0	1	0	1	1	0	0	0	0		2	2	1	0	0	0	0	0	2	0	4	0	15	2	21	21	4	9	9	2	2	2	2	5	2	5	5
52	55	0	0	NA	1	1	1	55	9/20/16	male	44	Right leg injury from farm machinery	1	1	0	0	1	0	0	0	0		2	2	1	0	0	0	0	0	0	0	0	2	11	2	20	999	1	7	7	2	2	2	2	7	1	5	5
53	56	0	0	NA	1	1	1	50	9/21/16	male	37	Left leg injury from MCC	1	1	0	0	0	0	0	0	0		2	2	4	4	4	0	0	4	0	4	0	2	30	2	25	998	1	2	4	3	3	5	1	1	5	5	5
54	57	0	0	NA	0	0	0	NA	9/21/16	male	44	MTA--HEAD INJURY	0	1	0	0	0	1	0	0	0		2	2	3	1	2	0	0	0	0	3	0	0	17	2	10	25	3	5	5	3	3	4	2	3	3	5	1
55	58	0	0	NA	0	0	0	NA	9/22/16	female	70	FALL DOWN # L FEMUR, R CLOSED #	0	1	0	0	0	0	0	0	0		2	2	2	0	0	0	0	0	0	0	0	0	10	2	14	14	4	9	9	1	1	1	2	4	1	5	5
57	60	0	0	NA	0	0	0	NA	9/22/16	male	37	Right leg injury from MVC	1	1	0	0	1	0	0	0	0		2	2	3	3	3	4	4	3	4	3	0	2	37	2	15	20	1	3	2	5	5	9	1	2	5	1	1
58	61	1	0	NA	1	1	1	39	9/5/16	male	67	Hit by cow while feeding and sustained #hip joint	1	0	0	0	1	1	0	0	0		2	1	NA	NA	NA	NA	NA	NA	NA	NA	0	0	0	2	999	999	7	NA	NA	999			NA	9	999	5	5
59	62	0	0	NA	0	0	0	NA	9/2/16	male	84	Involved in motorcycle accident sustained #R leg	1	0	0	0	0	0	0	0	1	Need reasurance	2	1	NA	NA	NA	NA	NA	NA	NA	NA	0	0	0	2	10	15	1	7	7	999	999	999	2	9	999	5	5
60	63	0	0	NA	1	1	1	40	9/6/16	male	64	Involved in motorcycle accident sustained #RL arm	1	1	0	0	0	0	0	0	0		2	2	2	0	0	0	0	0	0	0	0	0	10	2	14	21	1	2	6	999	999	998	1	3	998	1	1
62	65	0	0	NA	0	0	0	NA	7/9/16	male	29	Involved in motorcycle accident sustained head injury	1	0	0	0	1	0	0	0	0		2	2	3	1	0	0	0	0	0	0	0	0	12	2	9	18	6	7	7	2	999	4	2	6	999	5	5
63	66	0	0	NA	0	0	0	NA	9/8/16	male	45	Involved in motorcycle accident sustained #R leg	1	1	0	0	1	0	0	0	0		2	1	NA	NA	NA	NA	NA	NA	NA	NA	0	0	0	2	19	20	6	7	7	999	999)	999	2	7	2	5	5
64	68	1	0	NA	0	0	0	NA	9/12/16	male	64	Fall down and sustained mild injury	1	1	0	0	1	0	0	0	0		2	2	3	0	0	0	0	0	0	0	0	2	13	2	14	24	4	7	7	2	999	998	2	7	2	5	1
65	69	1	0	NA	0	0	0	NA	9/12/16	male	28	motorcycle accident and sustained head injury	1	1	0	0	1	0	0	0	0		2	2	4	4	4	4	4	4	0	2	0	4	43	2	17	20	1	1	2	998	998	10	1	2	10	1	1
66	70	0	0	NA	1	1	1	43	9/13/16	male	53	Fall down and sustained fracture of Lt leg	1	1	0	0	0	0	0	0	0		2	2	3	1	0	0	0	0	3	3	0	0	18	2	15	997	1	7	4	1	2	998	2	7	998	5	1
67	71	0	0	NA	0	0	0	NA	9/16/16	male	27	Involved in motorcycle accident sustained #L leg	1	1	0	0	0	0	0	0	1	good relationship btn Dr and nurses	2	1	NA	NA	NA	NA	NA	NA	NA	NA	0	0	0	2	998	997	6	7	7	999	999	9	9	6	999	5	5
68	72	0	0	NA	1	1	1	46	9/19/16	male	32	involved in car accident sustained fracture of L leg and arm	1	1	0	0	0	0	0	0	0		2	1	NA	NA	NA	NA	NA	NA	NA	NA	0	0	0	2	23	997	8	7	7	998	998	998	2	4	998	5	5
69	73	1	0	NA	1	1	1	44	9/17/16	male	19	Involved in motercycle and sustained mild head injury	1	1	0	0	1	0	0	0	0		2	2	3	1	0	0	0	0	0	0	0	0	12	2	14	16	3	8	8	3	999	5	2	6	999	5	1
70	74	0	0	NA	0	0	0	NA	9/9/16	male	33	Involved in motercycle and sustained hip joint injury	1	1	0	0	0	0	0	0	0		2	2	2	1	0	0	0	0	0	0	0	0	11	2	22	997	1	8	7	2	2	4	2	2	1	5	5
71	75	0	0	NA	1	1	1	71	10/22/16	male	46	involved in car accident and sustained fracture of the left arm	1	1	0	0	0	0	0	0	1	councelling	2	2	3	1	0	1	1	0	2	0	0	0	14	2	37	37	3	6	6	2	2	5	1	3	2	5	5
73	77	1	0	NA	1	1	1	79	10/26/16	male	50	involved in motorcycle sustained injury	1	1	0	0	0	0	0	0	0		2	2	3	0	0	0	0	0	2	0	0	2	15	2	30	34	8	6	7	999	999		1	5	2	5	5
74	78	0	0	NA	0	0	0	NA	10/28/16	male	24	involved in mtorcycle accident sustained fracture of rt arm	1	1	0	0	1	0	0	0	0		2	1	NA	NA	NA	NA	NA	NA	NA	NA	0	0	0	2	NA	NA	NA	NA	NA				NA	NA		NA	NA
76	80	0	0	NA	0	0	0	NA	10/4/16	NA	27	involved in motorcycle sustained open fracture of lt T/F	0	1	0	0	0	0	0	0	1	Hygiene	2	2	NA	0	2	0	0	2	4	0	2	2	24	2	23	23	1	3	2	2	2	9	1	2	2	1	1
78	82	1	0	NA	1	1	1	88	11/9/16	male	30	Multiple injuries after MCC	1	1	0	0	0	0	0	0	0		2	2	4	2	0	3	2	0	4	0	0	2	24	2	23	20	4	7	7	3	1	4	2	1	3	5	5
79	83	0	0	NA	0	1	1	NA	10/14/16	male	27	Right hand injury after fight	1	1	0	0	1	0	0	0	0		2	1	NA	NA	NA	NA	NA	NA	NA	NA	0	0	0	2	3	998	7	NA	NA	999			NA	5	3	1	1
82	86	0	0	NA	0	0	0	65	10/18/16	male	32	fracture of R femur	1	1	0	0	1	0	0	0	0		2	1	NA	NA	NA	NA	NA	NA	NA	NA	0	0	0	2	21	21	4	5	5	2	3	998	2	5	3	5	5
83	87	0	0	NA	1	1	1	66	10/18/16	male	33	involved in motorcycle sustained open fracture	0	1	0	0	0	1	0	0	0		2	2	4	1	2	3	0	0	4	0	4	4	26	2	17	17	1	8	5	2	4	8	1	1	4	1	1
84	89	0	0	NA	1	1	1	68	10/19/16	male	47	fracture of the R femur	0	1	0	0	0	0	0	0	0		2	2	4	1	2	3	0	3	4	0	0	2	27	2	15	15	2	4	3	10	8	999	1	2	998	1	1
87	92	0	0	NA	1	1	1	75	10/25/16	female	40	involved in motorcycle sustained head injury	1	1	0	0	1	0	0	0	1	councelling about life style	2	2	2	0	0	0	0	0	0	0	0	0	10	2	18	18	3	9	9	2	2	2	2	5	2	5	5
89	94	0	0	NA	1	1	1	77	10/25/16	female	40	Falling down sustainedopen fracture	1	1	0	0	0	0	0	0	1	Hygiene	2	2	2	0	0	0	0	0	0	0	0	0	10	2	18	18	4	9	4	1	2	3	2	4	1	5	5
90	95	1	0	NA	1	1	1	73	10/25/16	male	41	Left leg injury from MCC	1	1	0	1	1	0	0	0	0		2	2	2	2	2	2	1	0	1	1	2	2	23	2	19	20	3	6	5	2	2	5	1	1	2	1	1
91	96	1	0	NA	1	1	1	74	10/25/16	female	50	Left leg injury from fall	1	1	0	0	1	0	0	0	0		2	2	3	1	0	0	0	0	0	0	0	0	12	2	18	12	3	7	8	2	998	3	1	3	2	5	5
93	98	0	0	NA	0	0	0	NA	10/30/16	male	43	Right foot injury from accidental GSW	1	1	0	0	1	0	0	0	0		2	2	2	2	3	1	2	1	1	1	4	4	29	2	21	20	3	4	4	2	8	25	1	4	8	1	1
94	99	1	0	NA	1	1	1	81	11/1/16	male	60	Right femur fracture after MCC	1	1	0	0	1	0	0	0	0		2	2	4	0	0	0	0	0	0	0	0	0	12	2	25	20	1	7	7	2	1	2	2	1	1	5	5
95	100	0	1	0.4	0	0	0	100	1/11/16	male	18	involved in car accident and sustained fracture of T/F	0	1	0	0	0	0	0	0	0		2	2	3	1	0	0	3	0	2	0	0	0	18	2	17	17	3	3	3	3	3	5	1	3	3	1	1
97	102	0	0	NA	1	1	1	85	11/2/16	male	62	Fall from height and injuring left leg	1	1	0	0	1	0	0	0	1	Pray	2	2	2	0	0	0	0	0	0	0	0	2	12	2	20	20	3	6	6	2	999	999	2	NA		5	5
98	103	1	1	0.3	1	1	1	83	11/4/16	male	40	Assaulted after hitting somone with his car	1	1	0	0	1	0	0	0	0		2	2	2	1	0	1	2	0	2	0	0	0	16	2	18	20	3	3	5	4	999	998	2	5	999	1	1
100	105	0	0	NA	0	0	0	86	11/8/16	male	42	right femur fracture after assault	1	1	0	0	1	0	0	0	1	Get a prescription	2	2	2	0	0	0	0	0	2	0	0	0	12	2	25	20	1	7	7	1	1	1	2	1	1	5	5
101	106	0	0	NA	1	1	1	87	11/9/16	male	27	Assault	1	1	0	0	1	0	0	0	0		2	2	1	1	0	0	0	0	2	2	0	0	14	2	18	20	9	7	6	2	2	5	1	6	1	1	1
104	109	0	1	0.12	1	1	1	97	11/18/16	male	38	involved in motorcycle sustained open fracture of patella	0	1	0	0	1	0	0	0	0		2	2	3	3	2	0	0	0	3	3	4	4	30	2	20	20	5	1	2	6	8	9	1	1	7	1	1
105	110	0	0	NA	1	0	0	NA	11/17/16	male	35	involved in car accident and sustained fracture of Tibia L	0	1	0	0	0	0	0	1	1	Hygiene	2	2	3	3	3	3	0	0	3	0	0	4	27	2	20	20	3	3	3	7	8	9	1	3	7	1	5
107	112	0	0	NA	0	0	0	NA	11/16/16	male	46	involved in car accident and sustained fracture of Tibia L	0	1	0	0	1	1	0	0	0		2	1	NA	NA	NA	NA	NA	NA	NA	NA	2	0	2	2	15	15	9	9	9	3	999	999	9	5	3	5	5
108	113	0	0	NA	1	1	1	99	11/21/16	female	29	fall down sustainedR knee injury	0	1	0	0	1	0	0	1	0		2	2	2	0	0	0	0	0	0	0	0	0	10	2	23	23	3	9	NA	999	1	1	2	3	1	5	5
109	114	0	0	NA	1	1	1	61	10/14/16	male	41	involved in motorcycle sustained head injury	1	1	0	0	1	0	0	0	0		2	2	3	2	2	2	0	4	3	0	0	4	28	2	998	12	1	2	4	3	3	5	1	1	999	1	1
110	115	0	0	NA	0	0	0	NA	11/16/16	male	28	involved in motorcycle sustained head injury	1	1	0	0	1	0	0	0	0		2	2	2	0	0	0	0	0	0	0	0	0	10	2	27	997	5	7	7	1	1	999	2	7	1	5	5
111	116	0	0	NA	0	0	0	NA	11/14/16	male	21	INVOLVED IN MTA--HEAD INJURY	1	1	0	0	1	0	0	1	0		2	1	NA	NA	NA	NA	NA	NA	NA	NA	0	0	0	2	19	997	9	7	7	2	2	4	2	1	2	5	1
112	117	1	0	NA	1	1	1	84	6/11/15	female	31	involved in motorcycle accident sustained R leg injury	1	1	0	0	1	0	0	0	0		2	2	1	1	0	0	0	0	0	0	2	2	14	2	997	17	5	7	6	2	998	998	1	6	2	1	5
113	118	0	0	NA	1	1	1	96	11/17/16	male	32	involved in motorcylcle accident sustained R femur and head injury	1	1	0	0	1	1	0	0	0		2	2	4	3	4	0	4	0	0	0	0	0	27	2	12	12	1	1	1	7	7	12	1	1	7	1	5
114	119	1	1	11	1	1	1	104	11/24/16	male	41	assaulted with unknown people sustained arm injury	1	1	0	0	1	0	0	0	0		2	2	3	1	0	0	0	0	0	0	0	0	12	2	38	997	4	7	7	999	999	999	8	6	1	5	5
115	120	0	0	NA	1	1	1	102	11/22/16	female	28	assaulted with wood sustained arm injury	1	1	0	0	0	0	0	0	0		2	2	4	2	3	4	4	4	4	4	2	4	40	2	16	17	1	2	1	2	6	7	1	1	5	1	1
116	121	0	0	NA	1	1	1	14	8/3/17	female	25	MTA HEAD INJURY +OPEN# RT/F	0	1	0	0	0	0	0	0	0		2	2	4	1	0	3	0	0	0	0	0	0	17	2	16	18	3	9	3	3-Feb	3-Feb	4	2	3	3-Feb	5	5
117	122	0	0	NA	0	0	0	NA	9/2/16	male	25	INVOLVED IN MOTORCYCLE ACCIDENT AND SUSTAINED#3 L LEG	1	1	0	0	0	0	0	0	0		2	2	1	0	0	0	4	4	4	2	0	0	23	2	10	18	1	4	5	1	1 LITRE	1	1	1	2	1	1
118	123	0	0	NA	0	0	0	NA	9/8/16	male	30	ELECTRICITY BURN INJURY	1	1	0	0	1	0	0	0	0		2	2	4	1	3	3	0	3	4	3	4	0	33	2	10	28	3	3	3	4	3	7	1	1	2	1	1
119	124	0	0	NA	0	0	0	NA	10/18/16	male	41	MTA SUSTAINED LEG INJURT	1	1	0	0	1	0	0	0	0		2	2	3	4	4	4	4	4	1	3	2	2	39	2	19	22	1	1	1	18	10	23	1	2	10	1	1
120	125	0	0	NA	1	1	1	67	10/19/16	male	23	MTA AND SUSTAINED R ARM INJURY	1	1	0	0	1	0	0	0	0		2	2	1	1	0	0	0	0	0	0	0	0	10	2	22	22	7	NA	NA	1			NA	7	999	5	5
121	126	0	0	NA	1	1	1	70	10/21/16	male	50	FALLEN DOWN AND SUSTAINED # LT	1	1	0	0	1	0	0	0	0		2	2	3	0	0	3	0	0	0	0	0	0	16	2	18	30	3	7	7	2	2	2	2	3	2	5	5
122	127	0	0	NA	0	0	0	NA	11/5/16	male	20	MTA-OPEN # R METATARSAL	0	1	0	0	1	0	0	0	0		2	2	3	0	0	0	0	0	0	0	2	2	15	2	18	18	4	9	8	2	2	2	9	4	2	5	5
125	130	0	0	NA	1	1	1	93	11/16/16	male	26	INVOLVED IN MOTORCYCLE ACCIDENT AND SUSTAINED MILD HEAD AND LEFT LEG INJURY	1	1	0	1	1	0	0	0	0		2	2	3	1	2	2	0	0	0	0	0	2	18	2	18	18	4	4	6	3	3	9	1	4	3	5	1
126	131	0	0	NA	1	1	1	94	11/17/16	male	37	INVOLVED IN MOTORCYCLE ACCIDENT AS A PASSENGER AND SUSTAIN INJURY ON LT LEG	1	1	0	0	1	0	0	0	1	GOOD TREATMENT AT THE RIGHT TIME	2	2	4	1	1	4	3	2	4	2	0	0	29	2	18	30	1	2	6	2	2	4	1	2	2	1	5
127	132	0	0	NA	0	0	0	95	11/17/16	female	22	INVOLVED IN THREE WHEEL MOTORCYCLE (BAJAJ) ACCIDENT AND SUSTAINED INJURY ON THE LT MANDIBLE	1	1	0	0	1	0	0	1	0		2	2	2	1	0	0	0	0	2	0	0	4	17	2	17	19	1	4	7	3	999	999	2	1	999	5	5
128	133	0	0	NA	0	0	0	NA	10/10/16	male	47	INVOLVED IN MOTORCYCLE ACCIDENT AND SUSTAINED MILD HEAD INJURY	1	1	0	0	1	0	0	0	0		2	2	3	0	0	1	1	2	2	0	4	4	25	2	17	29	1	7	7	2	2	3	1	1	2	1	1
129	134	1	0	NA	1	1	1	58	10/11/16	male	40	INVOLVED IN MOTORCYCLE ACCIDENT AND SUSTAINED # L LEG	1	1	0	0	1	0	0	0	0		2	2	1	1	0	1	0	0	0	0	0	0	11	2	20	22	3	7	7	3	3	5	2	3	1	5	5
130	135	0	0	NA	1	1	1	59	10/11/16	male	36	HEAD INJURY + HIP JOINT AFTER FALL DOWN	1	1	0	0	1	1	0	0	0		2	2	2	2	1	2	0	0	2	2	0	4	23	2	18	26	3	3	7	3	2	6	2	7	1	5	5
133	138	1	0	NA	1	1	1	63	10/17/16	male	35	INVOLVED IN MOTORCYCLE ACCIDENT AND SUSTAINED MILD HEAD INJURY AND LT ARM INJURY	0	1	0	0	1	0	0	0	0		2	2	2	1	0	1	0	1	1	0	0	0	15	2	20	20	3	7	7	3	1	998	2	4	1	5	5
134	139	1	0	NA	1	1	1	64	10/17/16	male	44	ASSAULTED BY HIS NEIGHBOR AND SUSTAINED HEAD INJURY	1	1	0	0	1	0	0	0	0		2	2	4	0	0	0	0	0	0	0	4	4	20	2	14	18	1	7	7	2	1	4	1	1	1	5	5
135	140	0	0	NA	1	1	1	98	11/19/16	male	62	PATIENT FALL DOWN WHILE DOING EXERCISES AND SUSTAINED # RIGHT ARM	1	1	0	0	1	0	0	0	0		2	2	3	0	0	0	0	0	0	0	0	4	15	2	14	32	1	7	7	2	1	3	2	4	2	5	5
137	142	1	0	NA	0	0	0	NA	11/23/16	male	62	PEDESTRIAN HIT BY MOTORCYCLE AND SUSTAINED HEAD AND CHEST INJURY	1	1	0	0	1	0	0	0	1	TO PRAY GOD	2	2	3	0	0	0	0	1	0	0	0	2	14	2	15	18	3	7	6	2	2	4	1	2	2	1	1
138	143	0	0	NA	1	1	1	103	11/24/16	male	19	MTA- # R FEMUR	0	1	0	0	1	0	0	0	1	HYGIENE	2	2	2	0	0	0	1	0	4	0	0	0	15	2	17	17	4	9	9	1	3	3	9	4	3-Feb	5	1
139	144	1	0	NA	1	1	1	105	11/26/16	male	39	MTA- # TIBIA	1	1	0	0	0	1	0	0	1	HYGINE	2	2	3	2	3	3	0	3	4	0	4	0	30	2	13	13	3	3	3	6-May	6-May	7	1	3	7-May	1	1
142	147	0	0	NA	1	1	1	106	11/28/16	male	31	STUBBED AND SUSTAINED LT LUNG (WOUND)	1	1	0	0	1	0	0	0	0		2	2	3	1	0	0	0	0	0	2	2	2	18	2	10	24	1	6	6	4	2	4	2	1	1	5	5
143	148	0	0	NA	0	0	0	233	11/29/16	male	29	HIT BY PIECE OF HEAVY METAL # LEFT FOOT	0	1	0	0	1	0	0	1	0		2	2	1	3	1	1	0	0	1	0	2	0	17	2	29	29	6	6	1	998	8	8	2	9	8	5	1
144	149	0	0	NA	0	0	0	NA	11/30/16	female	24	INVOLVED IN MOTORCYCLE ACCIDENT AND SUSTAINED # LT LEG	0	1	0	0	1	0	0	0	1	TO REDUCE AMOUNT OF ALCOHOL	2	2	3	1	1	1	2	0	1	0	4	4	25	2	19	22	2	4	8	4	3	8	1	6	3	1	1
145	150	0	0	NA	0	0	0	NA	10/1/16	male	19	INVOLVED IN MOTORCYCLE ACCIDENT AND SUSTAINED # RT LEG	1	1	0	0	1	0	0	0	0		2	2	2	0	0	0	0	0	0	0	0	0	10	2	18	998	5	7	7	2	998	2	2	7	998	5	5
148	153	0	0	NA	0	0	0	108	12/2/16	male	27	MTA # L BIG TOE	1	1	0	0	0	0	0	0	1	NOT DRINKING STRONG ALCOHOL, TO PREVENT HIV INFECTION	2	1	NA	NA	NA	NA	NA	NA	NA	NA	4	0	4	2	18	18	7	NA	NA	998			NA	7	0.5	5	5
150	155	1	0	NA	1	1	1	110	12/5/16	male	55	FALLEN DOWN WHEN RUNNING FROM SNAKE AND SUSTAINED # RT LEG	1	1	0	1	0	0	0	0	1	BELIEVE ONLY IN GOD	2	2	2	0	0	0	0	0	0	0	0	0	10	2	30	997	4	7	7	2	999	3	2	7	999	5	5
151	156	0	0	NA	1	1	1	111	12/6/16	male	30	FALL DOWN SUSTAINED HEAD INJURY	0	1	0	0	0	1	0	0	0		2	2	2	1	0	0	0	0	0	0	0	0	13	2	15	20	3	9	3	4	4	4	2	3	4-Mar	5	5
153	158	1	1	0.11	1	1	1	113	12/7/16	male	32	ASSAULTED BY SOMEONE AND SUSTAINED # RT LEG	1	1	0	0	1	0	0	0	0		2	2	3	0	0	0	4	4	4	3	2	0	28	2	21	25	2	6	5	2	3	7	1	2	2	1	1
154	159	0	0	NA	1	1	1	114	12/8/16	male	45	MTA--SPINAL INJURY	1	1	0	0	1	0	0	0	0		2	1	NA	NA	NA	NA	NA	NA	NA	NA	0	0	0	2	15	18	4	9	9	2	2	2	2	4	1	5	5
155	160	0	0	NA	1	1	1	115	12/12/16	female	45	FALLEN DOWN FROM TREE AND SUSTAINED A LOWER LIMBS INJURY	1	1	0	0	1	0	0	0	0		2	2	3	0	0	0	0	0	0	0	0	0	11	2	16	18	1	7	7	2	1	998	2	7	1	5	5
156	161	0	0	NA	0	0	0	NA	12/12/16	male	38	ASSAULTED--LT ARM	0	0	0	1	0	0	0	0	1	HYGIENE, RELIGIOUS FAITH	2	2	4	0	0	0	0	0	4	0	0	0	16	2	25	25	3	9	5	3	3-Feb	3	2	3	2	1	5
157	162	0	0	NA	1	1	1	116	12/12/16	male	20	INVOLVED IN MOTORCYCLE ACCIDENT AND SUSTAINED HEAD INJURY	0	0	0	0	1	0	0	0	1	TO PRAY GOD	2	2	2	0	0	0	0	0	1	0	0	0	11	2	16	18	1	7	6	3	1	4	1	1	1	1	5
158	163	0	0	NA	1	1	1	117	12/13/16	male	58	ASSAULTED--HEAD INJURY AND R FOOT INJURY	0	0	0	1	0	0	0	0	1	AVOID SMOKING CIGARETTES, PREVENT HIV/ AIDS	2	2	4	1	0	4	0	0	0	0	0	0	17	2	12	19	1	9	1	998	4-Mar	4	9	1	4	5	5
159	164	0	0	NA	1	1	1	118	12/14/16	male	48	INVOLVED IN MOTORCYCLE ACCIDENT AND SUSTAINED HEAD ARM INJURY	1	1	0	0	1	0	0	0	1	TO GET REST	2	1	NA	NA	NA	NA	NA	NA	NA	NA	0	0	0	2	30	33	7	NA	NA	1			NA	7	999	5	5
161	166	0	0	NA	0	0	0	120	12/12/16	male	55	ASSAULTED WITH HIS BROTHER AND SUSTAINED BOTH ARM INJURY	1	1	0	0	1	0	0	0	0		2	2	2	0	0	0	0	0	4	0	0	0	10	2	25	997	5	7	7	1	999	2	2	5	999	5	5
162	167	1	1	0.01	0	0	0	NA	12/17/16	male	39	ASSAULTED WITH HEAVY OBJECT AND SUSTAINED HEAD INJURY	1	1	0	0	1	0	0	0	0		2	2	4	2	1	2	0	3	4	2	4	2	32	2	10	23	2	4	4	3	3	6	1	3	3	1	1
163	168	0	0	NA	0	0	0	NA	12/17/16	female	31	MTA-HEAD INJURY	0	1	0	0	0	0	0	1	0		2	2	2	0	0	0	0	0	3	0	0	0	13	2	31	31	4	9	4	2	2	2	2	4	2	5	5
164	169	1	0	NA	0	0	0	NA	12/18/16	male	29	MTA-HEAD INJURY	1	0	0	0	0	0	0	0	1	PREVENTION OF DISEASES	2	2	2	2	3	3	0	0	3	0	2	4	26	2	24	24	4	4	4	5	6	10	1	4	6	5	1
165	170	1	1	0.05	1	1	1	121	12/19/16	male	39	Left food injury	0	1	0	0	0	0	0	1	0		2	2	3	2	3	3	0	0	3	0	2	0	24	2	998	20	4	4	4	4	6	6	2	4	6	5	1
166	171	0	0	NA	1	1	1	122	12/20/16	male	40	MOTORCYCLE ACCIDENT--# R LEG	1	1	0	0	1	0	0	0	1	TO CREATE GOOD INTERPERSONAL RELATIONSHIP WITH NURSES	2	2	4	1	0	0	0	0	0	0	0	0	13	2	17	17	7	NA	NA	2			NA	2	2	5	1
167	172	0	0	NA	1	1	1	123	12/20/16	male	40	MTA--CRUSHED L FOOT INJURY	0	1	1	0	1	0	0	0	0		2	2	4	1	1	0	0	2	3	3	0	0	20	2	17	17	3	8	3	3	3	6	1	3	6	1	1
168	173	0	0	NA	0	0	0	NA	12/20/16	male	24	CAR ACCIDENT--# R ARM	1	1	0	0	1	0	0	0	0		2	2	0	1	4	4	3	4	4	4	0	2	38	2	10	18	1	2	3	2	2	4	1	2	2	1	1
170	175	0	0	NA	1	1	1	125	12/22/16	male	28	ASSAULTED AND SUSTAINED # L ARM	1	1	0	0	1	0	0	0	0		2	1	NA	NA	NA	NA	NA	NA	NA	NA	0	0	0	2	19	997	7	NA	NA	999			NA	7	999	5	5
171	176	1	0	NA	1	1	1	126	2/23/16	female	50	INVOLVED IN MOTORCYCLE ACCIDENT AS A PASSENGER AND SUSTAINED MULTIPLE INJURIES, LT LEG, BRUISES AND HEAD INJURY	1	1	0	0	1	1	0	0	0		2	2	3	0	0	0	0	0	0	0	0	0	11	2	18	19	3	7	7	2	999	3	2	3	999	5	5
178	183	0	0	NA	0	0	0	NA	12/28/16	male	32	ASSAULTED BY UNKNOWN PEOPLE AND SUSTAINED HEAD INJURY	1	1	0	0	1	0	0	0	0		2	2	3	0	0	2	2	0	0	0	0	4	19	2	20	21	3	7	4	2	2	3	2	2	3	5	5
179	184	0	0	NA	0	0	0	NA	12/29/16	male	48	MULTIPLE INJURIES-HEAD, LT ARM, AFTER THE STONE FALLEN ON HIM WHEN CLIMBING MOUNTAIN	1	1	0	0	1	0	0	0	0		2	1	NA	NA	NA	NA	NA	NA	NA	NA	0	0	0	2	45	45	7	NA	NA	1			NA	7	1	5	5
180	185	1	0	NA	1	1	1	132	12/31/16	male	24	INVOLVED IN MOTORCYCLE ACCIDENT AND SUSTAINED HEAD INJURY	1	1	0	0	1	0	0	0	0		2	2	3	0	0	3	2	3	0	0	0	0	19	2	20	23	4	7	4	1	1	1	1	1	2	5	5
182	187	1	1	0.11	0	0	0	NA	1/3/17	female	34	INVOLVED IN CAR ACCIDENT AND SUSTAINED HEAD INJURY	1	1	0	0	1	0	0	0	0		2	2	1	1	0	0	0	0	0	0	0	2	12	2	27	27	4	7	7	1	999	3	2	4	1	5	5
183	188	0	0	NA	0	0	0	NA	1/4/16	male	25	INVOLVED IN CAR ACCIDENT AND SUSTAINED INJURY ON RT LEG	0	1	0	0	1	0	0	1	0		2	1	NA	NA	NA	NA	NA	NA	NA	NA	0	0	0	2	20	997	7	NA	NA	1			NA	6	1	5	5
185	190	0	0	NA	0	0	0	NA	1/6/17	female	27	INVOLVED IN CAR ACCIDENT AND SUSTAINED INJURY ON LT LEG	1	1	0	0	1	0	0	0	0		2	1	NA	NA	NA	NA	NA	NA	NA	NA	0	2	2	2	20	997	7	NA	NA	1			NA	6	1	5	5
186	191	0	0	NA	0	0	0	NA	1/6/17	female	37	MTA-R HIP INJURY	0	0	0	0	1	0	1	0	1	AVOID STRESS	2	2	1	0	0	0	0	0	0	0	0	0	9	2	13	30	5	9	5	1	3-Jan	3	2	4	1	5	5
187	192	0	0	NA	1	1	1	135	1/6/17	male	39	FALL DOWN FROM MANGO TREE AND SUSTAINED # ARM	1	1	0	0	1	0	0	0	0		2	1	NA	NA	NA	NA	NA	NA	NA	NA	0	2	2	2	22	997	7	NA	NA	999			NA	6	2	5	5
188	193	0	0	NA	1	1	1	136	1/7/17	male	42	INJURED BY A STONE- HEAD INJURY	0	1	0	1	1	0	0	0	0		2	2	4	2	4	4	4	4	3	0	0	0	33	2	20	20	1	1	1	6	6	8	1	3	6	1	1
189	194	1	1	0.1	0	0	0	NA	1/7/17	male	22	FALL DOWN	0	1	0	1	0	0	0	0	0		2	2	3	1	0	0	0	0	1	0	0	0	13	2	22	22	1	9	1	3	3	5	2	1	3	5	5
191	196	0	0	NA	0	0	0	NA	1/8/17	male	48	FALL DOWN-#FEMUR R	0	1	0	1	0	0	0	0	1	NO SMOKING CIGARETTES	2	1	NA	NA	NA	NA	NA	NA	NA	NA	2	0	2	2	18	18	9	9	9	4	999	999	9	1	4	1	1
192	197	0	0	NA	0	0	0	NA	1/10/17	male	28	MTA- L # FEMUR	1	1	0	0	1	0	0	0	1	HYGINE	2	1	NA	NA	NA	NA	NA	NA	NA	NA	0	2	2	2	18	18	9	9	9	2	999	999	2	3	2	5	5
193	198	0	0	NA	0	0	0	NA	1/11/17	male	24	MTA--OPEN # T/F	1	1	0	0	1	0	0	0	0		2	2	2	2	3	3	0	3	4	0	0	2	27	2	20	20	4	4	4	4	6-Apr	8	1	4	3	1	1
195	200	0	0	NA	0	0	0	NA	1/11/17	male	58	INVOLVED IN MOTORCYCLE ACCIDENT AS A PASSENGER AND SUSTAINED # R LEG	1	1	0	0	1	0	0	0	1	PRAY GOD	2	2	4	1	0	2	0	2	4	2	0	4	27	2	20	21	2	3	3	3	998	998	1	3	5	1	1
197	202	0	0	NA	1	1	1	138	1/13/17	male	37	INVOLVED IN CAR ACCIDENT AND SUSTAINED # ON BOTH LEGS	1	1	0	0	0	0	0	1	0		2	2	3	1	0	2	2	0	2	0	0	2	20	2	20	25	3	7	7	2	2	4	2	3	2	5	5
198	203	0	0	NA	0	0	0	NA	1/13/17	male	22	INVOLVED IN MOTORCYCLE AND CAR ACCIDENT AND SUSTAINED # RT LEG	1	1	0	0	1	0	0	1	0		2	2	3	4	3	0	0	0	0	0	0	0	18	2	14	18	3	6	7	2	2	4	1	3	2	5	1
200	205	0	0	NA	0	0	0	NA	1/18/17	male	27	INVOLVED IN MOTORCYCLE ACCIDENT AND SUSTAINED # LT LEG	1	1	0	0	1	0	0	0	0		2	2	2	1	0	1	0	0	3	0	2	2	19	2	9	12	3	6	6	1	2	5	1	3	1	1	1
201	206	1	1	0.01	1	0	0	NA	1/18/17	male	32	ASSAULTED BY PERSON AND SUSTAINED HEAD INJURY	1	0	0	0	1	0	0	0	0		2	2	3	0	0	0	0	0	0	0	0	0	11	2	28	28	3	7	7	2	1	2	2	3	1	5	5
202	207	1	1	0.03	1	1	1	140	1/20/17	male	27	INVOLVED IN MOTORCYCLE ACCIDENT AND SUSTAINED # L LEG AND R ARM	1	1	0	0	1	0	0	0	0		2	2	2	1	0	0	0	0	0	0	0	0	11	2	18	23	4	7	7	3	999	4	2	4	1	5	5
203	208	0	0	NA	0	0	0	NA	1/24/16	male	27	CAR ACCIDENT-MULTIPLE INJURIES, HEAD + LEG	1	1	0	0	1	0	0	0	1	DON'T CONCENTRATE ON WHAT HAPPENED BEFORE	2	2	2	1	0	0	0	0	0	0	0	4	15	2	21	997	3	8	7	3	100	5	2	7	5	5	5
204	209	0	0	NA	0	0	0	NA	1/25/17	male	43	MOTORCYCLE ACCIDENT--# R LEG	1	1	0	1	1	0	0	0	0		2	2	3	1	0	0	0	0	0	0	0	0	12	2	25	28	4	7	7	3	998	4	2	4	998	5	5
205	210	1	0	NA	1	1	1	141	1/26/17	male	38	MOTORCYCLE ACCIDENT--HEAD INJURY	1	1	0	0	1	0	0	0	0		2	2	4	1	3	3	3	0	3	2	2	0	29	2	21	21	2	4	2	4	4	20	1	2	4	1	1
207	212	0	0	NA	1	1	1	142	1/30/17	male	25	# OF RT HUMERUS RT LEG	1	1	0	0	0	0	0	0	1	REMOVE FORE BODY TO MY LEG	2	2	3	1	0	1	0	0	1	0	0	0	14	2	20	23	3	3	7	1	999	3	2	7	999	5	5
208	213	0	0	NA	1	0	1	143	1/30/17	male	42	FALL DOWN FROM A TREE- # R LEG	1	0	0	0	1	0	0	0	0		2	2	3	1	0	0	0	0	2	0	0	2	16	2	18	30	2	7	6	2	998	3	1	2	2	5	5
209	214	0	0	NA	1	1	1	144	1/31/17	male	26	FALL DOWN--DOING EXERCISE	1	1	0	0	0	0	0	0	1	TO FOLLOW INSTRUCTIONS FROM DOCTOR OR NURSE	2	1	NA	NA	NA	NA	NA	NA	NA	NA	0	0	0	2	20	997	7	NA	NA	999			NA	9	999	5	5
211	216	0	0	NA	1	1	1	146	2/1/17	male	20	MOTORCYCLE ACCIDENT--# LT LEG	1	1	0	0	1	0	0	0	0		2	2	3	0	0	0	0	0	0	0	0	0	11	2	20	997	7	NA	NA	1			NA	6	999	5	5
212	217	0	0	NA	1	1	1	147	2/2/17	male	19	MOTORCYCLE ACCIDENT--HEAD INJURY AND RT LEG INJURY	1	1	1	0	1	0	0	0	1	TREATMENT SHOULD BE GIVEN AT THE RIGHT TIME	2	2	2	0	0	0	0	0	0	0	0	0	10	2	15	17	4	7	6	2	999	4	2	7	999	5	5
214	219	0	0	NA	1	1	1	234	2/7/17	male	33	MOTORCYCLE ACCIDENT--HEAD INJURY AND RT LEG INJURY	1	1	0	0	1	0	0	0	0		2	2	1	2	0	0	0	0	0	0	0	0	11	2	18	19	4	7	6	3	999	5	2	7	999	5	5
215	220	0	0	NA	1	1	1	148	2/8/17	male	25	FALL DOWN FROM TREE--# NECK AND LT FEMUR	1	1	0	0	1	0	0	0	1	REMOVE STRESS	2	2	2	0	0	1	2	0	2	0	0	2	17	2	14	20	4	4	7	2	999	4	1	6	999	1	1
216	221	0	0	NA	0	0	0	NA	2/8/17	male	26	ASSAULTED AND SUSTAINED NECK AND HEAD INJURY	1	0	0	0	1	0	0	0	0		2	2	3	0	0	0	0	0	0	0	0	2	13	2	998	998	4	7	7	1	1	2	2	7	1	5	5
217	222	0	0	NA	0	0	0	NA	2/9/17	male	20	CUT WOUND ON THE R FINGER	1	0	0	0	1	0	0	0	1	PREVENTION OF TETANUS TOXID	2	1	NA	NA	NA	NA	NA	NA	NA	NA	0	0	0	2	18	997	7	NA	NA	1			NA	7	999	5	5
219	224	0	0	NA	1	1	1	150	2/10/17	male	25	FALL DOWN FROM ROOF-# R LEG	1	1	0	0	1	0	0	0	0		2	2	2	0	0	0	0	0	0	0	0	0	10	2	10	22	4	7	6	2	62	2	2	7	2	5	5
220	225	0	0	NA	1	1	1	150	2/14/17	female	24	MTA-OPEN COMMUNICATED # R PATTELA	0	1	0	0	1	0	0	1	0		2	2	2	0	0	0	0	0	0	0	0	0	10	2	17	17	3	9	9	1	1	999	2	3	1	5	5
221	226	0	0	NA	0	0	0	NA	2/14/17	female	21	MTA--CLOSED # L FEMUR	0	1	0	0	1	0	0	0	1	HYGIENE, PREVENTION OF INFECTION OF DISEASES	2	2	2	0	0	0	0	0	0	0	0	0	10	2	13	13	5	9	9	1	1	1	2	5	1	5	5
223	228	0	0	NA	1	1	1	153	2/15/17	female	40	FALL DOWN--# R FEMUR	0	1	0	0	1	0	0	0	0		2	2	3	0	0	0	0	0	4	0	0	0	15	2	24	24	4	9	9	1	1	1	2	4	2	5	5
225	230	0	0	NA	0	0	0	NA	2/16/17	female	26	MTA--HEAD INJURY AND # L LEG	0	1	0	0	0	0	0	0	0		2	2	2	0	0	0	0	3	4	4	0	2	23	2	9	18	3	9	5	2	2	998	1	3	2	5	1
226	231	0	0	NA	1	1	1	155	1/17/17	female	20	CUT WOUND BY INDUSTRIAL MACHINE-R # T/F	1	1	0	0	1	0	0	0	0		2	2	1	0	0	0	0	0	0	0	0	0	9	2	18	18	6	9	9	2	2	2	2	6	2	5	5
227	232	0	0	NA	0	0	0	NA	2/20/17	female	48	FALL DOWN-# R FEMUR	0	1	0	0	1	0	0	0	0		2	2	3	0	0	0	0	0	0	0	0	0	12	2	18	18	3	9	9	2	2	2	2	3	2	5	5
228	233	0	0	NA	0	0	0	NA	2/20/17	female	37	MTA--#L KNEE	1	1	0	0	1	0	0	0	1	RECREATION	2	2	2	0	1	0	0	0	0	0	0	0	11	2	26	26	6	9	9	1	1	1	2	6	1	5	5
229	234	0	0	NA	1	1	1	156	2/20/17	male	23	MOTORCYCLE ACCIDENT-- # LT LEG	1	1	0	0	1	0	0	0	0		2	2	1	0	0	0	0	0	2	0	0	2	13	2	20	997	7	NA	NA	2			NA	6	999	5	5
231	236	1	0	NA	1	1	1	157	2/21/17	male	40	MOTORCYCLE ACCIDENT--HEAD INJURY	1	1	0	0	1	0	0	0	0		2	2	3	0	0	0	3	0	0	0	0	2	16	2	20	20	2	7	6	2	1	999	2	9	998	5	5
232	237	1	0	NA	1	1	1	158	2/21/17	male	33	MOTORCYCLE ACCIDENT--HEAD INJURY	0	1	0	0	1	0	0	0	1	TO GET FREE TREATMENT IF YOU DON'T HAVE MONEY	2	1	NA	NA	NA	NA	NA	NA	NA	NA	0	0	0	2	30	30	6	7	7	1	1	999	1	6	999	5	5
234	239	0	0	NA	1	1	1	160	2/22/17	male	45	MOTORCYCLE ACCIDENT-- # R LEG	1	1	0	0	1	0	0	0	0		2	2	3	0	0	0	3	0	0	0	0	2	16	2	22	30	5	7	5	1	2	999	2	2	999	5	5
235	240	0	0	NA	1	1	1	161	2/22/17	female	57	MTA---TBI AND # R ANKLE	0	1	0	0	0	0	0	0	0		2	2	3	1	0	0	0	0	0	0	0	0	13	2	18	18	3	9	9	3	3	3	9	3	3	5	5
236	241	0	0	NA	1	1	1	162	2/22/17	female	32	MTA--# # CLOSE # L HUMERUS	1	1	0	0	1	0	0	0	0		2	2	1	1	0	0	0	0	0	0	0	0	10	2	25	25	4	9	9	3	3	3	9	4	3	5	5
237	242	0	0	NA	1	1	1	162	2/22/17	male	32	MTA--HEAD INJURY	1	1	0	0	0	0	0	0	0		2	2	3	3	4	4	0	0	4	0	0	4	30	2	998	22	3	3	3	7	7	7	2	3	8	5	5
239	244	1	0	NA	1	1	1	164	2/24/17	male	24	MOTORCYCLE ACCIDENT--HEAD INJURY AND LEG INJURY	1	1	0	0	1	0	0	0	0		2	2	3	1	0	2	2	2	3	2	4	4	31	2	18	22	3	2	4	2	3	7	1	3	3	1	1
242	247	0	0	NA	0	0	0	NA	3/1/17	male	29	MOTORCYCLE ACCIDENT--HEAD INJURY AND LT LEG INJURY	1	1	0	0	1	0	0	0	1	GET TREATMENT AS SOON AS POSSIBLE	2	2	3	1	0	0	0	1	2	0	0	4	19	2	10	24	3	6	6	2	2	5	1	6	2	1	1
243	248	0	0	NA	1	1	1	167	3/1/17	male	26	MOTORCYCLE ACCIDENT--# R LEG AND R ARM	1	1	0	0	1	0	0	0	0		2	1	NA	NA	NA	NA	NA	NA	NA	NA	0	2	2	2	18	997	7	NA	NA	999			NA	7	999	5	5
245	250	0	0	NA	1	1	1	170	3/2/17	male	23	ASSAULTED WITH UNKNOWN PEOPLE--MILD HEAD INJURY	1	1	0	0	1	1	0	0	0		2	1	NA	NA	NA	NA	NA	NA	NA	NA	0	0	0	2	22	997	7	NA	NA	999			NA	7	999	5	5
247	252	0	0	NA	0	0	0	NA	3/3/17	male	39	MTA L LEG INJURY	1	1	0	0	0	0	0	0	0		2	2	4	1	1	0	0	0	4	0	2	2	22	2	7	25	1	1	1	8	8	8	1	2	8	5	1
248	253	0	0	NA	0	0	0	NA	3/4/17	male	32	MOTORCYCLE COLLIDE WITH CAR---SUSTAINED # R LEG	1	1	0	0	1	0	0	0	1	PRAY GOD	2	2	2	0	0	0	0	0	0	0	0	0	10	2	18	28	4	5	6	2	999	5	1	6	999	1	5
250	255	NA	NA	NA	NA	NA	NA	NA	3/6/17	male	22	SNAKE BITE--SWELLING VERY PAINFULL	1	0	0	0	0	1	0	0	0		2	1	NA	NA	NA	NA	NA	NA	NA	NA	0	0	0	2	12	997	7	NA	NA	999			NA	7	999	5	5
252	257	0	0	NA	1	1	1	173	3/7/17	male	49	MTA- SPINAL INJURY	0	1	0	1	1	0	0	0	1	REDUCE CIGARETTES	2	2	4	1	3	4	0	4	4	0	2	0	30	2	10	18	1	3	3	5	6	6	2	1	6	5	1
253	258	0	0	NA	0	0	0	NA	3/7/17	male	54	FALL DOWN --# BASAL CERVICE L FEMUR	1	1	0	0	1	0	0	1	1	TREATMENT, REASURANCE	2	1	NA	NA	NA	NA	NA	NA	NA	NA	0	0	0	2	20	30	7	NA	NA	10			NA	2	10	1	1
254	259	0	0	NA	1	1	1	174	3/8/17	male	36	FALL DOWN --# R LEG	1	1	0	0	1	1	0	0	0		2	2	4	2	0	3	0	0	3	0	0	4	26	2	20	28	3	7	6	2	2	4	1	2	3	1	5
258	263	0	0	NA	1	1	1	178	3/10/17	male	85	FALL DOWN-# L FEMUR	0	1	0	0	1	1	0	1	0		2	1	NA	NA	NA	NA	NA	NA	NA	NA	0	2	2	2	998	21	4	9	1	5	5	8	1	1	2	5	5
260	265	0	0	NA	1	1	1	179	3/13/17	male	31	MTA- OPEN # T/F AND HEAD INJURY	1	1	0	0	0	0	0	0	1	PRAYERS, COOPERATION WITH NEIGHBOURS	2	2	4	0	0	0	0	0	4	0	0	0	16	2	23	23	4	9	9	2	2	2	2	4	2	5	5
261	266	0	0	NA	1	1	1	180	3/13/17	female	55	FALL DOWN--# R LEG	1	1	0	0	1	1	0	0	0		2	1	NA	NA	NA	NA	NA	NA	NA	NA	0	0	0	2	18	997	7	NA	NA	999			NA	7	999	5	5
262	267	0	0	NA	0	0	0	NA	3/13/17	male	22	MTA- SOFT TISSUE INJURY	1	1	0	0	0	0	0	1	0		2	2	1	0	0	0	0	0	4	4	0	0	17	2	14	18	6	9	6	3	2	3	9	6	3	1	5
263	268	0	0	NA	1	1	1	181	3/14/17	male	23	MOTORCYCLE ACCIDENT--# R LEG	1	1	0	0	1	0	0	0	0		2	2	1	1	0	0	3	0	0	0	0	2	15	2	2	14	5	6	6	1	999	3	2	3	1	1	5
264	269	0	0	NA	1	1	1	183	3/14/17	male	27	MOTORCYCLE ACCIDENT--# L LEG	1	1	0	0	1	0	0	1	0		2	2	2	0	0	0	0	0	0	0	0	0	10	2	16	23	4	6	6	0.5 LT	2	3	1	4	1	1	5
265	270	0	0	NA	1	1	1	182	3/14/17	male	40	ASSAULTED AND SUSTAINED NECK INJURY	1	1	0	0	1	0	0	0	0		2	2	4	1	0	3	0	0	4	0	0	2	22	2	14	24	9	9	9	3	3	999	9	4	3	5	5
267	272	0	0	NA	1	1	1	185	3/15/17	male	27	MTA- # R ULNA	0	1	0	0	0	0	0	0	0		2	1	NA	NA	NA	NA	NA	NA	NA	NA	0	2	2	2	18	18	9	9	9	9	999	999	9	1	3	5	5
268	273	0	0	NA	1	1	1	186	3/15/17	female	53	MOTORCYCLE COLLIDE WITH A CAR AND--# R LEG	1	1	0	0	1	0	0	0	1	PRAY GOD	2	1	NA	NA	NA	NA	NA	NA	NA	NA	0	0	0	2	25	997	7	NA	NA	1			NA	7	999	5	5
269	274	0	0	NA	1	1	1	187	3/16/17	male	38	CAR ACCIDENT--# R LEG	1	1	0	0	1	0	0	0	0		2	2	2	0	0	0	0	0	2	2	0	0	14	2	18	22	2	7	7	2	2	3	2	2	2	5	5
272	277	0	0	NA	1	1	1	190	3/18/17	male	26	INJURY FACIAL ON LEFT MANDIBLE	1	1	0	0	1	0	0	0	0		2	2	2	1	1	0	0	1	1	0	0	0	14	2	16	20	3	6	6	3	999	5	1	3	2	1	1
273	278	0	0	NA	0	0	0	NA	3/20/17	female	47	CAR ACCIDENT--# R ARM	0	0	0	0	0	0	0	0	0		2	2	3	0	0	0	0	0	0	0	0	0	11	2	20	25	3	6	7	3	1	2	2	6	2	5	5
274	279	1	0	NA	0	0	0	NA	3/22/17	male	35	GUN SHOT--#R LEG	1	0	0	0	1	0	0	0	1	PRAY GOD	2	2	4	2	1	3	3	3	3	0	0	2	25	2	17	23	1	1	4	3	2	7	1	2	3	1	1
275	280	0	0	NA	1	1	1	191	3/20/17	male	32	MTA--CLOSED # R FEMUR	0	1	0	0	0	0	0	0	1	HYGINE	2	2	3	1	0	3	0	0	0	4	2	0	21	2	19	19	4	9	4	2	2	3	1	4	2	5	1
276	281	0	0	NA	0	0	0	NA	1/23/17	male	40	MOTORCYCLE ACCIDENT--# L LEG	1	1	0	0	1	0	0	0	0		2	1	NA	NA	NA	NA	NA	NA	NA	NA	0	0	0	2	24	30	7	NA	NA	1			NA	4	5	1	1
277	282	0	0	NA	1	1	1	192	3/24/17	male	25	MOTORCYCLE ACCIDENT-- R LEG INJURY	1	1	0	0	1	0	0	0	0		2	2	2	0	0	0	0	1	0	0	0	0	11	2	20	22	7	NA	NA	2			NA	7	1	5	5
278	283	0	0	NA	1	1	1	193	3/24/17	male	77	CAR ACCIDENT--L LEG INJURY	1	1	0	0	1	0	0	0	0		2	1	NA	NA	NA	NA	NA	NA	NA	NA	0	0	0	2	31	40	7	NA	NA	1			NA	3	2	5	5
280	285	0	0	NA	0	0	0	NA	3/28/17	male	24	MTA--# R T/F	1	1	0	0	1	0	0	0	0		2	2	4	1	0	0	0	0	0	0	0	0	13	2	18	18	3	9	9	2	3	5	1	3	3	5	5
281	286	0	0	NA	1	1	1	196	3/28/17	male	65	MOTORCYCLE ACCIDENT--# R LEG	1	1	0	0	0	0	0	0	1	PATIENT WORRIED ABOUT THE HOSPITAL PAYMENTS	2	2	2	2	2	0	0	0	0	0	0	0	14	2	30	38	2	3	7	5	998	999	2	7	998	5	5
282	287	1	0	NA	1	1	1	197	3/30/17	male	43	INJURED WHEN PLAYING--# LEG	0	1	0	0	0	0	0	0	0		2	2	3	1	2	1	3	1	3	2	0	2	26	2	10	18	2	2	4	3	2	6	1	2	2	5	1
283	288	1	1	0.03	1	1	1	198	3/30/17	male	33	ASSAULTED WITH UNKNOWN PEOPLE--# R ARM	0	0	0	0	0	0	0	0	0		2	2	3	0	0	0	0	0	0	0	2	2	16	2	20	23	2	7	7	3	2	4	2	3	2	5	1
284	289	0	0	NA	0	0	0	NA	3/24/17	male	42	MTA--CHEST INJURY	1	1	0	0	1	0	0	0	1	HYGINE	2	2	4	1	0	0	0	0	0	0	4	0	17	2	28	28	3	9	9	9	2	2	9	3	2	5	5
286	291	0	0	NA	0	0	0	NA	3/27/17	male	53	FALL DOWN--R LEG INJURY	1	1	0	0	1	0	0	0	1	PRAY GOD	2	2	4	2	4	2	0	1	0	2	0	2	25	2	5	31	2	2	4	3	3	5	1	2	2	5	1
288	293	0	0	NA	1	1	1	199	3/31/17	female	54	MOTORCYCLE ACCIDENT--# R LEG	1	1	0	0	1	0	0	0	1	PRAY GOD	2	2	3	1	0	0	0	0	3	0	0	0	16	2	22	39	3	7	6	1	3	4	1	3	3	5	5
289	294	0	0	NA	0	0	0	NA	4/3/17	male	20	CUT WOUND--RIGHT FOOT	1	1	0	0	1	0	0	0	0		2	1	NA	NA	NA	NA	NA	NA	NA	NA	0	0	0	2	10	997	7	NA	NA	998			NA	7	999	5	5
290	295	0	0	NA	1	1	1	200	4/4/17	female	73	FALL DOWN--# R LEG	1	1	0	0	1	0	0	0	0		2	2	3	0	0	0	0	0	0	0	0	0	11	2	22	27	3	7	7	2	999	999	2	7	999	5	5
291	296	0	0	NA	1	1	1	201	4/5/17	male	45	FALL DOWN--# R LEG	1	1	0	0	1	0	0	0	0		2	1	NA	NA	NA	NA	NA	NA	NA	NA	0	0	0	2	30	35	3	4	6	2	999	999	2	3	1	5	5
292	297	0	0	NA	1	1	1	202	4/6/17	male	73	FALL DOWN-- # L LEG	1	1	0	0	1	0	0	0	0		2	1	NA	NA	NA	NA	NA	NA	NA	NA	0	0	0	2	17	18	4	7	7	999	999	1	2	7	999	5	5
293	298	0	0	NA	1	1	1	203	3/7/17	male	29	MOTORCYCLE COLLIDE WITH A CAR--# R LEG	1	1	0	0	1	0	0	0	0		2	2	2	1	0	0	4	3	4	3	4	2	31	2	18	20	3	2	7	2	3	3	2	3	3	5	1
294	299	0	0	NA	0	0	0	NA	4/10/17	male	31	MTA-# L T/F	1	1	0	0	0	0	0	0	1	HYGINE	2	2	3	1	4	3	0	0	3	0	2	4	26	2	998	14	3	4	4	3	6	998	1	3	6	5	5
295	300	0	0	NA	1	1	1	204	4/10/17	male	50	CAR ACCIDENT--# R LEG AND HEAD	1	1	0	0	1	0	0	0	0		2	2	0	1	0	1	0	0	0	0	0	2	12	2	7	15	2	7	7	1	1	1	2	7	1	5	5
296	301	0	0	NA	0	0	0	NA	4/10/17	male	24	ASSAULTED--CUT WOUND L ARM	0	1	0	0	1	0	0	0	0		2	2	3	1	0	0	0	0	4	0	0	4	20	2	13	16	4	9	9	3	3	3	2	3	3	5	5
297	302	0	0	NA	1	1	1	205	4/11/17	male	63	ASSAULTED BY ROBBERS AND SUSTAINED MULTIPLE INJURIES, HEAD AND RT ARM	0	1	0	0	1	0	0	0	0		2	2	3	1	0	0	0	0	2	0	0	4	18	2	25	36	3	7	7	2	1	999	8	1	1	1	5
300	305	0	0	NA	0	0	0	NA	4/12/17	male	34	FALL DOWN--# SPINAL	0	1	0	0	0	0	0	0	0		2	2	1	0	0	0	0	0	4	0	0	4	17	2	22	22	6	9	9	999	999	999	2	9	1	5	5
301	306	0	0	NA	0	0	0	NA	4/12/17	male	48	MTA--HEAD INJURY # SPINAL	0	1	0	0	1	1	0	0	1	HYGINE	2	2	4	4	2	3	0	0	4	0	2	2	28	2	19	19	3	4	9	6	6	8	1	3	8	5	1
302	307	0	0	NA	NA	NA	NA	207	4/13/17	male	24	FALL DOWN WHEN PLAYING FOOTBALL--# L ARM	0	0	0	0	1	0	0	0	1	GET TREATMENT AT RIGHT TIME	2	1	NA	NA	NA	NA	NA	NA	NA	NA	0	0	0	2	20	999	6	7	7	2	999	999	2	5	999	5	5
303	308	0	0	NA	0	0	0	NA	4/13/17	male	33	FALL DOWN--# L FEMUR	1	1	0	0	1	0	0	0	0		2	2	2	1	0	0	0	0	1	0	4	0	16	2	19	19	4	9	5	3	3	3	2	5	3	1	5
304	309	0	0	NA	1	1	1	208	1/18/17	male	42	ASSAULTED-- R LEG	1	1	0	0	1	0	0	0	0		2	1	NA	NA	NA	NA	NA	NA	NA	NA	0	2	2	2	37	38	7	NA	NA	2			NA	4	2	5	5
306	311	0	0	NA	0	0	0	NA	4/22/17	female	58	MOTORCYCLE ACCIDENT--# R LEG	1	1	0	0	1	0	0	0	0		2	2	0	0	0	0	0	0	0	0	0	0	8	2	28	30	3	7	7	1	999	2	2	4	1	5	5
307	312	1	1	0.175	1	1	1	209	11/18/16	male	24	MTA--CHEST INJURY AND L FOOT INJURY	0	1	0	0	0	0	0	0	0		2	2	4	1	2	0	0	0	4	0	2	4	25	2	18	18	2	5	9	4	5	6	1	3	4	5	5
308	313	0	0	NA	1	1	1	210	3/15/17	male	20	MTA-OPEN # R T/F	0	1	0	1	0	0	0	0	0		2	2	4	0	0	0	0	4	4	0	2	4	26	2	998	17	4	9	4	2	2	2	2	3	2	1	5
310	315	0	0	NA	1	1	1	212	4/24/17	male	55	FALL DOWN--# R LEG	1	1	0	0	1	0	0	0	0		2	2	1	1	1	0	0	0	0	0	0	2	13	2	8	22	4	6	7	2	1	6	1	4	1	5	5
311	316	0	0	NA	1	1	1	213	4/25/17	male	22	MTA-# L T/F	0	1	0	0	1	0	0	0	1	HYGINE	2	2	1	0	0	0	0	0	1	1	0	0	11	2	15	20	3	9	9	3	3	3	2	6	3	5	1
312	317	1	0	NA	1	1	1	214	4/25/17	male	26	MOTORCYCLE ACCIDENT--L LEG INJURY	1	1	0	0	1	0	0	1	0		2	2	1	2	0	1	0	0	1	0	0	2	15	2	9	20	4	6	4	2	999	7	2	4	999	5	5
313	318	1	0	NA	1	1	1	215	4/27/17	male	49	FALL DOWN--# R LEG	1	1	0	0	1	0	0	0	0		2	2	3	1	0	3	0	0	2	2	2	2	23	2	20	25	2	5	5	2	2	5	1	2	2	5	5
314	319	0	0	NA	1	1	1	216	4/27/17	male	74	MTA--TBI	0	1	0	0	0	0	0	0	0		2	2	4	0	0	4	0	0	4	0	0	0	20	2	16	18	3	9	9	3	4	4	1	3	4	5	5
315	320	0	0	NA	1	1	1	217	4/27/17	female	62	FALL DOWN--# R FEMUR	1	1	0	0	0	0	0	1	0		2	2	3	0	0	0	0	0	0	0	0	0	11	2	35	40	4	9	7	2	2	3	2	4	2	5	5
316	321	0	0	NA	1	1	1	218	4/27/17	male	41	MTA--VASCULAR AND CHEST INJURIES	0	1	1	0	1	0	0	0	0		2	2	4	1	0	3	0	0	4	0	0	4	24	2	18	23	3	9	3	3	3	4	2	3	3	5	1
319	324	1	0	NA	1	1	1	221	4/28/17	female	22	MOTORCYCLE ACCIDENT--HEAD INJURY	1	1	0	0	1	0	0	0	0		2	2	2	2	2	0	0	0	0	0	0	0	15	2	20	997	3	6	7	5	5	999	2	7	5	5	5
321	326	0	0	NA	1	1	1	223	5/2/17	male	37	MTA--TBI	0	1	0	0	0	0	0	0	1	HYGINE	2	2	4	1	3	3	0	0	4	0	0	0	23	2	22	30	3	3	9	3	3	4	1	3	3	5	5
322	327	0	0	NA	1	1	1	224	5/2/17	female	39	FALL DOWN--BILATERAL # OF MALEOLA	0	1	0	0	0	1	0	0	1	HYGINE	2	2	4	0	2	0	0	0	4	0	4	4	26	2	998	34	3	6	6	2	3	6	1	3	3	5	5
324	329	1	0	NA	1	1	1	226	5/2/17	male	50	FALL DOWN AFTER BEEN KNOCKED BY COW--# R THIGH	1	1	0	0	1	0	0	0	0		2	2	4	2	4	3	1	3	0	3	0	0	28	2	25	28	2	2	2	0.5 LITRE	998	1 LITTRE	1	2	2 GLAS	1	1
325	330	0	0	NA	1	1	1	227	5/3/17	female	47	MTA--# R THIGH	1	1	0	0	0	0	0	1	0		2	1	NA	NA	NA	NA	NA	NA	NA	NA	0	0	0	2	20	19	7	NA	NA	999			NA	6	1	5	5
326	331	0	0	NA	1	1	1	228	5/3/17	male	48	CAR ACCIDENT--# RT FEMUR	1	1	0	0	1	0	0	0	0		2	2	2	1	2	0	0	0	2	0	0	4	19	2	29	29	3	4	9	3	999	5	2	3	3	5	5
327	332	0	0	NA	1	1	1	229	5/4/17	male	24	CAR ACCIDENT--HEAD INJURY	0	1	0	0	1	0	0	1	1	GET TREATMENT	2	2	3	1	0	2	2	0	3	0	0	0	19	2	12	20	4	9	2	3	3	4	2	1	3	1	1
328	333	0	0	NA	1	1	1	230	5/4/17	male	56	MOTORCYCLE ACCIDENT--# R LEG	1	1	0	0	1	0	0	0	1	TO FOLLOW INSTRUCTIONS FROM DOCTOR AND NURSE	2	2	2	0	0	0	0	0	2	0	0	0	13	2	21	25	4	9	9	2	999	999	2	9	999	5	5
329	334	0	0	NA	1	1	1	231	5/5/17	female	35	ASSAULTED---MILD HEAD INJURY	1	1	0	0	0	0	0	1	0		2	2	1	0	0	0	0	0	2	0	0	0	11	2	20	20	1	9	9	1	1	999	2	1	1	5	5
333	338	1	1	0.03	1	1	1	52	9/26/16	female	46	FALL DOWN--HEAD INJURY	0	1	0	0	0	1	0	0	0		2	2	2	0	0	0	0	0	0	0	0	0	10	2	20	20	3	9	8	9	1	1	9	4	1	5	5
335	340	1	1	0.08	1	1	1	53	9/27/16	male	43	MTA--HEAD INJURY	0	1	0	0	0	0	0	0	0		2	2	4	3	4	4	0	0	4	4	4	4	39	2	16	16	1	1	1	4	8	8	2	1	8	5	1
337	342	1	1	0.04	1	1	1	54	9/29/16	male	24	MTA--INJURY AND # T/F	0	1	0	0	1	1	0	0	1	DRESSING AND HYGENE	2	2	3	1	0	0	0	3	2	0	0	4	21	2	11	13	3	3	9	3	4	6	1	3	5	9	1
338	343	0	0	NA	0	0	0	NA	9/29/16	male	26	MTA--HEAD INJURY	1	0	0	0	0	0	0	0	0		2	1	NA	NA	NA	NA	NA	NA	NA	NA	2	0	2	2	20	20	4	9	9	2	2	2	2	4	2	5	5
342	1	NA	NA	NA	NA	NA	NA	NA	NA	male	32	NA	NA	NA	NA	NA	NA	NA	NA	NA	NA	NA	NA	1	NA	NA	NA	NA	NA	NA	NA	NA	NA	NA	2	2	NA	NA	NA	NA	NA	NA	NA	NA	NA	NA	NA	NA	NA
343	2	NA	NA	NA	NA	NA	NA	NA	NA	female	53	NA	NA	NA	NA	NA	NA	NA	NA	NA	NA	NA	NA	1	NA	NA	NA	NA	NA	NA	NA	NA	NA	NA	NA	2	NA	NA	NA	NA	NA	NA	NA	NA	NA	NA	NA	NA	NA
344	3	NA	NA	NA	NA	NA	NA	NA	NA	male	45	NA	NA	NA	NA	NA	NA	NA	NA	NA	NA	NA	NA	1	1	0	0	NA	NA	0	NA	NA	NA	NA	NA	2	NA	NA	NA	NA	NA	NA	NA	NA	NA	NA	NA	NA	NA
345	4	NA	NA	NA	NA	NA	NA	NA	NA	female	57	NA	NA	NA	NA	NA	NA	NA	NA	NA	NA	NA	NA	1	3	0	0	NA	NA	0	NA	NA	NA	NA	3	2	NA	NA	NA	NA	NA	NA	NA	NA	NA	NA	NA	NA	NA
346	5	NA	NA	NA	NA	NA	NA	NA	NA	female	45	NA	NA	NA	NA	NA	NA	NA	NA	NA	NA	NA	NA	1	2	1	3	NA	NA	3	NA	NA	NA	NA	26	2	NA	NA	NA	NA	NA	NA	NA	NA	NA	NA	NA	NA	NA
347	6	NA	NA	NA	NA	NA	NA	NA	NA	female	24	NA	NA	NA	NA	NA	NA	NA	NA	NA	NA	NA	NA	1	1	1	2	NA	NA	0	NA	NA	NA	NA	22	2	NA	NA	NA	NA	NA	NA	NA	NA	NA	NA	NA	NA	NA
348	7	NA	NA	NA	NA	NA	NA	NA	NA	female	26	NA	NA	NA	NA	NA	NA	NA	NA	NA	NA	NA	NA	1	1	0	0	NA	NA	0	NA	NA	NA	NA	18	2	NA	NA	NA	NA	NA	NA	NA	NA	NA	NA	NA	NA	NA
349	8	NA	NA	NA	NA	NA	NA	NA	NA	female	65	NA	NA	NA	NA	NA	NA	NA	NA	NA	NA	NA	NA	1	3	1	0	NA	NA	0	NA	NA	NA	NA	NA	2	NA	NA	NA	NA	NA	NA	NA	NA	NA	NA	NA	NA	NA
350	9	NA	NA	NA	NA	NA	NA	NA	NA	male	19	NA	NA	NA	NA	NA	NA	NA	NA	NA	NA	NA	NA	1	NA	NA	NA	NA	NA	NA	NA	NA	NA	NA	NA	2	NA	NA	NA	NA	NA	NA	NA	NA	NA	NA	NA	NA	NA
351	10	NA	NA	NA	NA	NA	NA	NA	NA	female	57	NA	NA	NA	NA	NA	NA	NA	NA	NA	NA	NA	NA	1	1	0	0	NA	NA	0	NA	NA	NA	NA	NA	2	NA	NA	NA	NA	NA	NA	NA	NA	NA	NA	NA	NA	NA
354	13	NA	NA	NA	NA	NA	NA	NA	NA	female	41	NA	NA	NA	NA	NA	NA	NA	NA	NA	NA	NA	NA	1	2	0	0	NA	NA	0	NA	NA	NA	NA	NA	2	NA	NA	NA	NA	NA	NA	NA	NA	NA	NA	NA	NA	NA
356	15	NA	NA	NA	NA	NA	NA	NA	NA	male	42	NA	NA	NA	NA	NA	NA	NA	NA	NA	NA	NA	NA	1	2	0	0	NA	NA	0	NA	NA	NA	NA	NA	2	NA	NA	NA	NA	NA	NA	NA	NA	NA	NA	NA	NA	NA
357	16	NA	NA	NA	NA	NA	NA	NA	NA	male	29	NA	NA	NA	NA	NA	NA	NA	NA	NA	NA	NA	NA	1	NA	NA	NA	NA	NA	NA	NA	NA	NA	NA	0	2	NA	NA	NA	NA	NA	NA	NA	NA	NA	NA	NA	NA	NA
358	17	NA	NA	NA	NA	NA	NA	NA	NA	female	23	NA	NA	NA	NA	NA	NA	NA	NA	NA	NA	NA	NA	1	NA	NA	NA	NA	NA	NA	NA	NA	NA	NA	NA	2	NA	NA	NA	NA	NA	NA	NA	NA	NA	NA	NA	NA	NA
359	18	NA	NA	NA	NA	NA	NA	NA	NA	male	25	NA	NA	NA	NA	NA	NA	NA	NA	NA	NA	NA	NA	1	1	1	1	NA	NA	0	NA	NA	NA	NA	NA	2	NA	NA	NA	NA	NA	NA	NA	NA	NA	NA	NA	NA	NA
360	19	NA	NA	NA	NA	NA	NA	NA	NA	male	49	NA	NA	NA	NA	NA	NA	NA	NA	NA	NA	NA	NA	1	3	0	0	NA	NA	0	NA	NA	NA	NA	NA	2	NA	NA	NA	NA	NA	NA	NA	NA	NA	NA	NA	NA	NA
363	22	NA	NA	NA	NA	NA	NA	NA	NA	female	49	NA	NA	NA	NA	NA	NA	NA	NA	NA	NA	NA	NA	1	1	4	1	NA	NA	0	NA	NA	NA	NA	NA	2	NA	NA	NA	NA	NA	NA	NA	NA	NA	NA	NA	NA	NA
365	24	NA	NA	NA	NA	NA	NA	NA	NA	female	52	NA	NA	NA	NA	NA	NA	NA	NA	NA	NA	NA	NA	1	NA	NA	NA	NA	NA	NA	NA	NA	NA	NA	NA	2	NA	NA	NA	NA	NA	NA	NA	NA	NA	NA	NA	NA	NA
366	25	NA	NA	NA	NA	NA	NA	NA	NA	male	42	NA	NA	NA	NA	NA	NA	NA	NA	NA	NA	NA	NA	1	2	0	0	NA	NA	0	NA	NA	NA	NA	NA	2	NA	NA	NA	NA	NA	NA	NA	NA	NA	NA	NA	NA	NA
368	27	NA	NA	NA	NA	NA	NA	NA	NA	female	37	NA	NA	NA	NA	NA	NA	NA	NA	NA	NA	NA	NA	1	1	0	0	NA	NA	0	NA	NA	NA	NA	NA	2	NA	NA	NA	NA	NA	NA	NA	NA	NA	NA	NA	NA	NA
372	31	NA	NA	NA	NA	NA	NA	NA	NA	male	25	NA	NA	NA	NA	NA	NA	NA	NA	NA	NA	NA	NA	1	NA	NA	NA	NA	NA	NA	NA	NA	NA	NA	0	2	NA	NA	NA	NA	NA	NA	NA	NA	NA	NA	NA	NA	NA
373	32	NA	NA	NA	NA	NA	NA	NA	NA	female	27	NA	NA	NA	NA	NA	NA	NA	NA	NA	NA	NA	NA	1	3	0	0	NA	NA	0	NA	NA	NA	NA	NA	2	NA	NA	NA	NA	NA	NA	NA	NA	NA	NA	NA	NA	NA
374	33	NA	NA	NA	NA	NA	NA	NA	NA	male	56	NA	NA	NA	NA	NA	NA	NA	NA	NA	NA	NA	NA	1	3	0	2	NA	NA	0	NA	NA	NA	NA	NA	2	NA	NA	NA	NA	NA	NA	NA	NA	NA	NA	NA	NA	NA
375	34	NA	NA	NA	NA	NA	NA	NA	NA	male	65	NA	NA	NA	NA	NA	NA	NA	NA	NA	NA	NA	NA	1	3	0	2	NA	NA	0	NA	NA	NA	NA	NA	2	NA	NA	NA	NA	NA	NA	NA	NA	NA	NA	NA	NA	NA
376	35	NA	NA	NA	NA	NA	NA	NA	NA	female	24	NA	NA	NA	NA	NA	NA	NA	NA	NA	NA	NA	NA	1	2	0	0	NA	NA	0	NA	NA	NA	NA	NA	2	NA	NA	NA	NA	NA	NA	NA	NA	NA	NA	NA	NA	NA
377	36	NA	NA	NA	NA	NA	NA	NA	NA	female	55	NA	NA	NA	NA	NA	NA	NA	NA	NA	NA	NA	NA	1	1	0	0	NA	NA	0	NA	NA	NA	NA	NA	2	NA	NA	NA	NA	NA	NA	NA	NA	NA	NA	NA	NA	NA
380	39	NA	NA	NA	NA	NA	NA	NA	NA	female	50	NA	NA	NA	NA	NA	NA	NA	NA	NA	NA	NA	NA	1	NA	NA	NA	NA	NA	NA	NA	NA	NA	NA	0	2	NA	NA	NA	NA	NA	NA	NA	NA	NA	NA	NA	NA	NA
381	40	NA	NA	NA	NA	NA	NA	NA	NA	male	34	NA	NA	NA	NA	NA	NA	NA	NA	NA	NA	NA	NA	1	NA	NA	NA	NA	NA	NA	NA	NA	NA	NA	NA	2	NA	NA	NA	NA	NA	NA	NA	NA	NA	NA	NA	NA	NA
386	45	NA	NA	NA	NA	NA	NA	NA	NA	male	26	NA	NA	NA	NA	NA	NA	NA	NA	NA	NA	NA	NA	1	3	0	0	NA	NA	0	NA	NA	NA	NA	NA	2	NA	NA	NA	NA	NA	NA	NA	NA	NA	NA	NA	NA	NA
387	46	NA	NA	NA	NA	NA	NA	NA	NA	male	22	NA	NA	NA	NA	NA	NA	NA	NA	NA	NA	NA	NA	1	4	3	4	NA	NA	0	NA	NA	NA	NA	25	2	NA	NA	NA	NA	NA	NA	NA	NA	NA	NA	NA	NA	NA
388	47	NA	NA	NA	NA	NA	NA	NA	NA	male	25	NA	NA	NA	NA	NA	NA	NA	NA	NA	NA	NA	NA	1	NA	NA	NA	NA	NA	NA	NA	NA	NA	NA	0	2	NA	NA	NA	NA	NA	NA	NA	NA	NA	NA	NA	NA	NA
389	48	NA	NA	NA	NA	NA	NA	NA	NA	male	59	NA	NA	NA	NA	NA	NA	NA	NA	NA	NA	NA	NA	1	2	0	0	NA	NA	0	NA	NA	NA	NA	NA	2	NA	NA	NA	NA	NA	NA	NA	NA	NA	NA	NA	NA	NA
390	49	NA	NA	NA	NA	NA	NA	NA	NA	female	30	NA	NA	NA	NA	NA	NA	NA	NA	NA	NA	NA	NA	1	1	0	0	NA	NA	0	NA	NA	NA	NA	NA	2	NA	NA	NA	NA	NA	NA	NA	NA	NA	NA	NA	NA	NA
392	51	NA	NA	NA	NA	NA	NA	NA	NA	male	73	NA	NA	NA	NA	NA	NA	NA	NA	NA	NA	NA	NA	1	3	0	0	NA	NA	0	NA	NA	NA	NA	NA	2	NA	NA	NA	NA	NA	NA	NA	NA	NA	NA	NA	NA	NA
393	52	NA	NA	NA	NA	NA	NA	NA	NA	female	48	NA	NA	NA	NA	NA	NA	NA	NA	NA	NA	NA	NA	1	NA	NA	NA	NA	NA	NA	NA	NA	NA	NA	NA	2	NA	NA	NA	NA	NA	NA	NA	NA	NA	NA	NA	NA	NA
394	53	NA	NA	NA	NA	NA	NA	NA	NA	female	29	NA	NA	NA	NA	NA	NA	NA	NA	NA	NA	NA	NA	1	0	0	0	NA	NA	0	NA	NA	NA	NA	NA	2	NA	NA	NA	NA	NA	NA	NA	NA	NA	NA	NA	NA	NA
395	54	NA	NA	NA	NA	NA	NA	NA	NA	female	64	NA	NA	NA	NA	NA	NA	NA	NA	NA	NA	NA	NA	1	1	0	0	NA	NA	0	NA	NA	NA	NA	NA	2	NA	NA	NA	NA	NA	NA	NA	NA	NA	NA	NA	NA	NA
396	55	NA	NA	NA	NA	NA	NA	NA	NA	female	64	NA	NA	NA	NA	NA	NA	NA	NA	NA	NA	NA	NA	1	NA	NA	NA	NA	NA	NA	NA	NA	NA	NA	NA	2	NA	NA	NA	NA	NA	NA	NA	NA	NA	NA	NA	NA	NA
397	56	NA	NA	NA	NA	NA	NA	NA	NA	male	40	NA	NA	NA	NA	NA	NA	NA	NA	NA	NA	NA	NA	1	2	1	3	NA	NA	0	NA	NA	NA	NA	NA	2	NA	NA	NA	NA	NA	NA	NA	NA	NA	NA	NA	NA	NA
398	57	NA	NA	NA	NA	NA	NA	NA	NA	female	78	NA	NA	NA	NA	NA	NA	NA	NA	NA	NA	NA	NA	1	NA	NA	NA	NA	NA	NA	NA	NA	NA	NA	NA	2	NA	NA	NA	NA	NA	NA	NA	NA	NA	NA	NA	NA	NA
399	58	NA	NA	NA	NA	NA	NA	NA	NA	male	68	NA	NA	NA	NA	NA	NA	NA	NA	NA	NA	NA	NA	1	3	0	2	NA	NA	0	NA	NA	NA	NA	NA	2	NA	NA	NA	NA	NA	NA	NA	NA	NA	NA	NA	NA	NA
400	59	NA	NA	NA	NA	NA	NA	NA	NA	female	40	NA	NA	NA	NA	NA	NA	NA	NA	NA	NA	NA	NA	1	4	2	3	NA	NA	4	NA	NA	NA	NA	NA	2	NA	NA	NA	NA	NA	NA	NA	NA	NA	NA	NA	NA	NA
401	60	NA	NA	NA	NA	NA	NA	NA	NA	female	42	NA	NA	NA	NA	NA	NA	NA	NA	NA	NA	NA	NA	1	4	1	0	NA	NA	0	NA	NA	NA	NA	NA	2	NA	NA	NA	NA	NA	NA	NA	NA	NA	NA	NA	NA	NA
402	61	NA	NA	NA	NA	NA	NA	NA	NA	female	48	NA	NA	NA	NA	NA	NA	NA	NA	NA	NA	NA	NA	1	1	0	0	NA	NA	0	NA	NA	NA	NA	NA	2	NA	NA	NA	NA	NA	NA	NA	NA	NA	NA	NA	NA	NA
403	62	NA	NA	NA	NA	NA	NA	NA	NA	female	34	NA	NA	NA	NA	NA	NA	NA	NA	NA	NA	NA	NA	1	NA	NA	NA	NA	NA	NA	NA	NA	NA	NA	NA	2	NA	NA	NA	NA	NA	NA	NA	NA	NA	NA	NA	NA	NA
404	63	NA	NA	NA	NA	NA	NA	NA	NA	male	56	NA	NA	NA	NA	NA	NA	NA	NA	NA	NA	NA	NA	1	4	1	0	NA	NA	0	NA	NA	NA	NA	NA	2	NA	NA	NA	NA	NA	NA	NA	NA	NA	NA	NA	NA	NA
405	64	NA	NA	NA	NA	NA	NA	NA	NA	female	24	NA	NA	NA	NA	NA	NA	NA	NA	NA	NA	NA	NA	1	1	1	0	NA	NA	0	NA	NA	NA	NA	NA	2	NA	NA	NA	NA	NA	NA	NA	NA	NA	NA	NA	NA	NA
406	65	NA	NA	NA	NA	NA	NA	NA	NA	male	42	NA	NA	NA	NA	NA	NA	NA	NA	NA	NA	NA	NA	1	4	1	2	NA	NA	2	NA	NA	NA	NA	NA	2	NA	NA	NA	NA	NA	NA	NA	NA	NA	NA	NA	NA	NA
407	66	NA	NA	NA	NA	NA	NA	NA	NA	male	32	NA	NA	NA	NA	NA	NA	NA	NA	NA	NA	NA	NA	1	1	0	1	NA	NA	0	NA	NA	NA	NA	NA	2	NA	NA	NA	NA	NA	NA	NA	NA	NA	NA	NA	NA	NA
408	67	NA	NA	NA	NA	NA	NA	NA	NA	female	30	NA	NA	NA	NA	NA	NA	NA	NA	NA	NA	NA	NA	1	4	0	0	NA	NA	0	NA	NA	NA	NA	NA	2	NA	NA	NA	NA	NA	NA	NA	NA	NA	NA	NA	NA	NA
409	68	NA	NA	NA	NA	NA	NA	NA	NA	male	18	NA	NA	NA	NA	NA	NA	NA	NA	NA	NA	NA	NA	1	4	1	2	NA	NA	2	NA	NA	NA	NA	NA	2	NA	NA	NA	NA	NA	NA	NA	NA	NA	NA	NA	NA	NA
410	69	NA	NA	NA	NA	NA	NA	NA	NA	female	52	NA	NA	NA	NA	NA	NA	NA	NA	NA	NA	NA	NA	1	2	0	0	NA	NA	0	NA	NA	NA	NA	NA	2	NA	NA	NA	NA	NA	NA	NA	NA	NA	NA	NA	NA	NA
411	70	NA	NA	NA	NA	NA	NA	NA	NA	female	25	NA	NA	NA	NA	NA	NA	NA	NA	NA	NA	NA	NA	1	1	2	0	NA	NA	0	NA	NA	NA	NA	NA	2	NA	NA	NA	NA	NA	NA	NA	NA	NA	NA	NA	NA	NA
413	72	NA	NA	NA	NA	NA	NA	NA	NA	male	56	NA	NA	NA	NA	NA	NA	NA	NA	NA	NA	NA	NA	1	3	0	0	NA	NA	0	NA	NA	NA	NA	NA	2	NA	NA	NA	NA	NA	NA	NA	NA	NA	NA	NA	NA	NA
416	75	NA	NA	NA	NA	NA	NA	NA	NA	female	47	NA	NA	NA	NA	NA	NA	NA	NA	NA	NA	NA	NA	1	NA	NA	NA	NA	NA	NA	NA	NA	NA	NA	NA	2	NA	NA	NA	NA	NA	NA	NA	NA	NA	NA	NA	NA	NA
417	76	NA	NA	NA	NA	NA	NA	NA	NA	male	36	NA	NA	NA	NA	NA	NA	NA	NA	NA	NA	NA	NA	1	4	1	4	NA	NA	0	NA	NA	NA	NA	NA	2	NA	NA	NA	NA	NA	NA	NA	NA	NA	NA	NA	NA	NA
418	77	NA	NA	NA	NA	NA	NA	NA	NA	male	38	NA	NA	NA	NA	NA	NA	NA	NA	NA	NA	NA	NA	1	2	1	2	NA	NA	2	NA	NA	NA	NA	NA	2	NA	NA	NA	NA	NA	NA	NA	NA	NA	NA	NA	NA	NA
419	78	NA	NA	NA	NA	NA	NA	NA	NA	female	45	NA	NA	NA	NA	NA	NA	NA	NA	NA	NA	NA	NA	1	3	0	0	NA	NA	3	NA	NA	NA	NA	NA	2	NA	NA	NA	NA	NA	NA	NA	NA	NA	NA	NA	NA	NA
420	79	NA	NA	NA	NA	NA	NA	NA	NA	male	31	NA	NA	NA	NA	NA	NA	NA	NA	NA	NA	NA	NA	1	4	1	2	NA	NA	2	NA	NA	NA	NA	NA	2	NA	NA	NA	NA	NA	NA	NA	NA	NA	NA	NA	NA	NA
421	80	NA	NA	NA	NA	NA	NA	NA	NA	female	46	NA	NA	NA	NA	NA	NA	NA	NA	NA	NA	NA	NA	1	1	0	0	NA	NA	0	NA	NA	NA	NA	NA	2	NA	NA	NA	NA	NA	NA	NA	NA	NA	NA	NA	NA	NA
422	81	NA	NA	NA	NA	NA	NA	NA	NA	female	40	NA	NA	NA	NA	NA	NA	NA	NA	NA	NA	NA	NA	1	1	0	0	NA	NA	0	NA	NA	NA	NA	NA	2	NA	NA	NA	NA	NA	NA	NA	NA	NA	NA	NA	NA	NA
423	82	NA	NA	NA	NA	NA	NA	NA	NA	female	52	NA	NA	NA	NA	NA	NA	NA	NA	NA	NA	NA	NA	1	4	0	0	NA	NA	0	NA	NA	NA	NA	NA	2	NA	NA	NA	NA	NA	NA	NA	NA	NA	NA	NA	NA	NA
424	83	NA	NA	NA	NA	NA	NA	NA	NA	female	63	NA	NA	NA	NA	NA	NA	NA	NA	NA	NA	NA	NA	1	2	0	0	NA	NA	0	NA	NA	NA	NA	NA	2	NA	NA	NA	NA	NA	NA	NA	NA	NA	NA	NA	NA	NA
425	84	NA	NA	NA	NA	NA	NA	NA	NA	male	78	NA	NA	NA	NA	NA	NA	NA	NA	NA	NA	NA	NA	1	2	1	1	NA	NA	0	NA	NA	NA	NA	NA	2	NA	NA	NA	NA	NA	NA	NA	NA	NA	NA	NA	NA	NA
427	86	NA	NA	NA	NA	NA	NA	NA	NA	male	36	NA	NA	NA	NA	NA	NA	NA	NA	NA	NA	NA	NA	1	2	1	0	NA	NA	0	NA	NA	NA	NA	NA	2	NA	NA	NA	NA	NA	NA	NA	NA	NA	NA	NA	NA	NA
428	87	NA	NA	NA	NA	NA	NA	NA	NA	female	36	NA	NA	NA	NA	NA	NA	NA	NA	NA	NA	NA	NA	1	1	0	0	NA	NA	0	NA	NA	NA	NA	NA	2	NA	NA	NA	NA	NA	NA	NA	NA	NA	NA	NA	NA	NA
429	88	NA	NA	NA	NA	NA	NA	NA	NA	male	19	NA	NA	NA	NA	NA	NA	NA	NA	NA	NA	NA	NA	1	2	1	2	NA	NA	0	NA	NA	NA	NA	NA	2	NA	NA	NA	NA	NA	NA	NA	NA	NA	NA	NA	NA	NA
430	89	NA	NA	NA	NA	NA	NA	NA	NA	male	55	NA	NA	NA	NA	NA	NA	NA	NA	NA	NA	NA	NA	1	3	1	2	NA	NA	2	NA	NA	NA	NA	NA	2	NA	NA	NA	NA	NA	NA	NA	NA	NA	NA	NA	NA	NA
431	90	NA	NA	NA	NA	NA	NA	NA	NA	male	32	NA	NA	NA	NA	NA	NA	NA	NA	NA	NA	NA	NA	1	4	0	0	NA	NA	0	NA	NA	NA	NA	NA	2	NA	NA	NA	NA	NA	NA	NA	NA	NA	NA	NA	NA	NA
432	91	NA	NA	NA	NA	NA	NA	NA	NA	female	43	NA	NA	NA	NA	NA	NA	NA	NA	NA	NA	NA	NA	1	NA	NA	NA	NA	NA	NA	NA	NA	NA	NA	0	2	NA	NA	NA	NA	NA	NA	NA	NA	NA	NA	NA	NA	NA
433	92	NA	NA	NA	NA	NA	NA	NA	NA	male	37	NA	NA	NA	NA	NA	NA	NA	NA	NA	NA	NA	NA	1	2	1	0	NA	NA	2	NA	NA	NA	NA	NA	2	NA	NA	NA	NA	NA	NA	NA	NA	NA	NA	NA	NA	NA
434	93	NA	NA	NA	NA	NA	NA	NA	NA	female	44	NA	NA	NA	NA	NA	NA	NA	NA	NA	NA	NA	NA	1	2	0	0	NA	NA	0	NA	NA	NA	NA	NA	2	NA	NA	NA	NA	NA	NA	NA	NA	NA	NA	NA	NA	NA
436	95	NA	NA	NA	NA	NA	NA	NA	NA	male	42	NA	NA	NA	NA	NA	NA	NA	NA	NA	NA	NA	NA	1	NA	NA	NA	NA	NA	NA	NA	NA	NA	NA	NA	2	NA	NA	NA	NA	NA	NA	NA	NA	NA	NA	NA	NA	NA
437	96	NA	NA	NA	NA	NA	NA	NA	NA	male	40	NA	NA	NA	NA	NA	NA	NA	NA	NA	NA	NA	NA	1	2	1	0	NA	NA	0	NA	NA	NA	NA	NA	2	NA	NA	NA	NA	NA	NA	NA	NA	NA	NA	NA	NA	NA
438	97	NA	NA	NA	NA	NA	NA	NA	NA	male	24	NA	NA	NA	NA	NA	NA	NA	NA	NA	NA	NA	NA	1	NA	NA	NA	NA	NA	NA	NA	NA	NA	NA	NA	2	NA	NA	NA	NA	NA	NA	NA	NA	NA	NA	NA	NA	NA
440	99	NA	NA	NA	NA	NA	NA	NA	NA	male	53	NA	NA	NA	NA	NA	NA	NA	NA	NA	NA	NA	NA	1	NA	NA	NA	NA	NA	NA	NA	NA	NA	NA	0	2	NA	NA	NA	NA	NA	NA	NA	NA	NA	NA	NA	NA	NA
442	101	NA	NA	NA	NA	NA	NA	NA	NA	female	68	NA	NA	NA	NA	NA	NA	NA	NA	NA	NA	NA	NA	1	2	0	0	NA	NA	0	NA	NA	NA	NA	NA	2	NA	NA	NA	NA	NA	NA	NA	NA	NA	NA	NA	NA	NA
443	102	NA	NA	NA	NA	NA	NA	NA	NA	female	54	NA	NA	NA	NA	NA	NA	NA	NA	NA	NA	NA	NA	1	NA	NA	NA	NA	NA	NA	NA	NA	NA	NA	0	2	NA	NA	NA	NA	NA	NA	NA	NA	NA	NA	NA	NA	NA
445	104	NA	NA	NA	NA	NA	NA	NA	NA	male	25	NA	NA	NA	NA	NA	NA	NA	NA	NA	NA	NA	NA	1	1	0	0	NA	NA	0	NA	NA	NA	NA	NA	2	NA	NA	NA	NA	NA	NA	NA	NA	NA	NA	NA	NA	NA
446	105	NA	NA	NA	NA	NA	NA	NA	NA	male	41	NA	NA	NA	NA	NA	NA	NA	NA	NA	NA	NA	NA	1	3	0	0	NA	NA	0	NA	NA	NA	NA	NA	2	NA	NA	NA	NA	NA	NA	NA	NA	NA	NA	NA	NA	NA
447	106	NA	NA	NA	NA	NA	NA	NA	NA	male	63	NA	NA	NA	NA	NA	NA	NA	NA	NA	NA	NA	NA	1	4	1	3	NA	NA	0	NA	NA	NA	NA	NA	2	NA	NA	NA	NA	NA	NA	NA	NA	NA	NA	NA	NA	NA
448	107	NA	NA	NA	NA	NA	NA	NA	NA	female	35	NA	NA	NA	NA	NA	NA	NA	NA	NA	NA	NA	NA	1	1	0	0	NA	NA	0	NA	NA	NA	NA	NA	2	NA	NA	NA	NA	NA	NA	NA	NA	NA	NA	NA	NA	NA
449	108	NA	NA	NA	NA	NA	NA	NA	NA	female	64	NA	NA	NA	NA	NA	NA	NA	NA	NA	NA	NA	NA	1	3	1	0	NA	NA	0	NA	NA	NA	NA	NA	2	NA	NA	NA	NA	NA	NA	NA	NA	NA	NA	NA	NA	NA
450	109	NA	NA	NA	NA	NA	NA	NA	NA	male	44	NA	NA	NA	NA	NA	NA	NA	NA	NA	NA	NA	NA	1	1	0	0	NA	NA	0	NA	NA	NA	NA	NA	2	NA	NA	NA	NA	NA	NA	NA	NA	NA	NA	NA	NA	NA
451	110	NA	NA	NA	NA	NA	NA	NA	NA	female	48	NA	NA	NA	NA	NA	NA	NA	NA	NA	NA	NA	NA	1	1	0	0	NA	NA	0	NA	NA	NA	NA	NA	2	NA	NA	NA	NA	NA	NA	NA	NA	NA	NA	NA	NA	NA
452	111	NA	NA	NA	NA	NA	NA	NA	NA	female	53	NA	NA	NA	NA	NA	NA	NA	NA	NA	NA	NA	NA	1	NA	NA	NA	NA	NA	NA	NA	NA	NA	NA	0	2	NA	NA	NA	NA	NA	NA	NA	NA	NA	NA	NA	NA	NA
453	112	NA	NA	NA	NA	NA	NA	NA	NA	female	41	NA	NA	NA	NA	NA	NA	NA	NA	NA	NA	NA	NA	1	NA	NA	NA	NA	NA	NA	NA	NA	NA	NA	0	2	NA	NA	NA	NA	NA	NA	NA	NA	NA	NA	NA	NA	NA
455	114	NA	NA	NA	NA	NA	NA	NA	NA	male	25	NA	NA	NA	NA	NA	NA	NA	NA	NA	NA	NA	NA	1	2	1	0	NA	NA	0	NA	NA	NA	NA	NA	2	NA	NA	NA	NA	NA	NA	NA	NA	NA	NA	NA	NA	NA
456	115	NA	NA	NA	NA	NA	NA	NA	NA	male	18	NA	NA	NA	NA	NA	NA	NA	NA	NA	NA	NA	NA	1	2	0	0	NA	NA	0	NA	NA	NA	NA	NA	2	NA	NA	NA	NA	NA	NA	NA	NA	NA	NA	NA	NA	NA
457	116	NA	NA	NA	NA	NA	NA	NA	NA	male	35	NA	NA	NA	NA	NA	NA	NA	NA	NA	NA	NA	NA	1	3	1	1	NA	NA	0	NA	NA	NA	NA	NA	2	NA	NA	NA	NA	NA	NA	NA	NA	NA	NA	NA	NA	NA
458	117	NA	NA	NA	NA	NA	NA	NA	NA	male	37	NA	NA	NA	NA	NA	NA	NA	NA	NA	NA	NA	NA	1	4	0	0	NA	NA	0	NA	NA	NA	NA	NA	2	NA	NA	NA	NA	NA	NA	NA	NA	NA	NA	NA	NA	NA
459	118	NA	NA	NA	NA	NA	NA	NA	NA	female	65	NA	NA	NA	NA	NA	NA	NA	NA	NA	NA	NA	NA	1	NA	NA	NA	NA	NA	NA	NA	NA	NA	NA	NA	2	NA	NA	NA	NA	NA	NA	NA	NA	NA	NA	NA	NA	NA
460	119	NA	NA	NA	NA	NA	NA	NA	NA	male	25	NA	NA	NA	NA	NA	NA	NA	NA	NA	NA	NA	NA	1	3	1	0	NA	NA	0	NA	NA	NA	NA	NA	2	NA	NA	NA	NA	NA	NA	NA	NA	NA	NA	NA	NA	NA
461	120	NA	NA	NA	NA	NA	NA	NA	NA	male	20	NA	NA	NA	NA	NA	NA	NA	NA	NA	NA	NA	NA	1	1	0	0	NA	NA	0	NA	NA	NA	NA	NA	2	NA	NA	NA	NA	NA	NA	NA	NA	NA	NA	NA	NA	NA
462	121	NA	NA	NA	NA	NA	NA	NA	NA	male	24	NA	NA	NA	NA	NA	NA	NA	NA	NA	NA	NA	NA	1	3	1	3	NA	NA	2	NA	NA	NA	NA	NA	2	NA	NA	NA	NA	NA	NA	NA	NA	NA	NA	NA	NA	NA
463	122	NA	NA	NA	NA	NA	NA	NA	NA	male	23	NA	NA	NA	NA	NA	NA	NA	NA	NA	NA	NA	NA	1	1	0	0	NA	NA	0	NA	NA	NA	NA	NA	2	NA	NA	NA	NA	NA	NA	NA	NA	NA	NA	NA	NA	NA
464	123	NA	NA	NA	NA	NA	NA	NA	NA	female	32	NA	NA	NA	NA	NA	NA	NA	NA	NA	NA	NA	NA	1	2	0	0	NA	NA	0	NA	NA	NA	NA	NA	2	NA	NA	NA	NA	NA	NA	NA	NA	NA	NA	NA	NA	NA
466	125	NA	NA	NA	NA	NA	NA	NA	NA	male	24	NA	NA	NA	NA	NA	NA	NA	NA	NA	NA	NA	NA	1	4	3	2	NA	NA	0	NA	NA	NA	NA	NA	2	NA	NA	NA	NA	NA	NA	NA	NA	NA	NA	NA	NA	NA
467	126	NA	NA	NA	NA	NA	NA	NA	NA	female	34	NA	NA	NA	NA	NA	NA	NA	NA	NA	NA	NA	NA	1	1	0	1	NA	NA	0	NA	NA	NA	NA	NA	2	NA	NA	NA	NA	NA	NA	NA	NA	NA	NA	NA	NA	NA
468	127	NA	NA	NA	NA	NA	NA	NA	NA	male	42	NA	NA	NA	NA	NA	NA	NA	NA	NA	NA	NA	NA	1	NA	NA	NA	NA	NA	NA	NA	NA	NA	NA	0	2	NA	NA	NA	NA	NA	NA	NA	NA	NA	NA	NA	NA	NA
472	131	NA	NA	NA	NA	NA	NA	NA	NA	female	60	NA	NA	NA	NA	NA	NA	NA	NA	NA	NA	NA	NA	1	1	0	0	NA	NA	0	NA	NA	NA	NA	NA	2	NA	NA	NA	NA	NA	NA	NA	NA	NA	NA	NA	NA	NA
473	132	NA	NA	NA	NA	NA	NA	NA	NA	male	32	NA	NA	NA	NA	NA	NA	NA	NA	NA	NA	NA	NA	1	NA	NA	NA	NA	NA	NA	NA	NA	NA	NA	NA	2	NA	NA	NA	NA	NA	NA	NA	NA	NA	NA	NA	NA	NA
474	133	NA	NA	NA	NA	NA	NA	NA	NA	female	37	NA	NA	NA	NA	NA	NA	NA	NA	NA	NA	NA	NA	1	1	0	2	NA	NA	0	NA	NA	NA	NA	NA	2	NA	NA	NA	NA	NA	NA	NA	NA	NA	NA	NA	NA	NA
475	134	NA	NA	NA	NA	NA	NA	NA	NA	male	42	NA	NA	NA	NA	NA	NA	NA	NA	NA	NA	NA	NA	1	1	0	1	NA	NA	0	NA	NA	NA	NA	NA	2	NA	NA	NA	NA	NA	NA	NA	NA	NA	NA	NA	NA	NA
476	135	NA	NA	NA	NA	NA	NA	NA	NA	female	48	NA	NA	NA	NA	NA	NA	NA	NA	NA	NA	NA	NA	1	3	0	2	NA	NA	0	NA	NA	NA	NA	NA	2	NA	NA	NA	NA	NA	NA	NA	NA	NA	NA	NA	NA	NA
477	136	NA	NA	NA	NA	NA	NA	NA	NA	male	59	NA	NA	NA	NA	NA	NA	NA	NA	NA	NA	NA	NA	1	4	2	2	NA	NA	1	NA	NA	NA	NA	NA	2	NA	NA	NA	NA	NA	NA	NA	NA	NA	NA	NA	NA	NA
478	137	NA	NA	NA	NA	NA	NA	NA	NA	male	46	NA	NA	NA	NA	NA	NA	NA	NA	NA	NA	NA	NA	1	4	1	3	NA	NA	4	NA	NA	NA	NA	NA	2	NA	NA	NA	NA	NA	NA	NA	NA	NA	NA	NA	NA	NA
479	138	NA	NA	NA	NA	NA	NA	NA	NA	male	64	NA	NA	NA	NA	NA	NA	NA	NA	NA	NA	NA	NA	1	4	1	3	NA	NA	3	NA	NA	NA	NA	NA	2	NA	NA	NA	NA	NA	NA	NA	NA	NA	NA	NA	NA	NA
480	139	NA	NA	NA	NA	NA	NA	NA	NA	female	23	NA	NA	NA	NA	NA	NA	NA	NA	NA	NA	NA	NA	1	1	0	0	NA	NA	1	NA	NA	NA	NA	NA	2	NA	NA	NA	NA	NA	NA	NA	NA	NA	NA	NA	NA	NA
481	140	NA	NA	NA	NA	NA	NA	NA	NA	female	37	NA	NA	NA	NA	NA	NA	NA	NA	NA	NA	NA	NA	1	NA	NA	NA	NA	NA	NA	NA	NA	NA	NA	NA	2	NA	NA	NA	NA	NA	NA	NA	NA	NA	NA	NA	NA	NA
482	141	NA	NA	NA	NA	NA	NA	NA	NA	male	34	NA	NA	NA	NA	NA	NA	NA	NA	NA	NA	NA	NA	1	1	1	2	NA	NA	0	NA	NA	NA	NA	NA	2	NA	NA	NA	NA	NA	NA	NA	NA	NA	NA	NA	NA	NA
483	142	NA	NA	NA	NA	NA	NA	NA	NA	male	41	NA	NA	NA	NA	NA	NA	NA	NA	NA	NA	NA	NA	1	NA	NA	NA	NA	NA	NA	NA	NA	NA	NA	NA	2	NA	NA	NA	NA	NA	NA	NA	NA	NA	NA	NA	NA	NA
484	143	NA	NA	NA	NA	NA	NA	NA	NA	female	65	NA	NA	NA	NA	NA	NA	NA	NA	NA	NA	NA	NA	1	1	0	0	NA	NA	0	NA	NA	NA	NA	NA	2	NA	NA	NA	NA	NA	NA	NA	NA	NA	NA	NA	NA	NA
485	144	NA	NA	NA	NA	NA	NA	NA	NA	male	46	NA	NA	NA	NA	NA	NA	NA	NA	NA	NA	NA	NA	1	4	1	0	NA	NA	0	NA	NA	NA	NA	NA	2	NA	NA	NA	NA	NA	NA	NA	NA	NA	NA	NA	NA	NA
486	145	NA	NA	NA	NA	NA	NA	NA	NA	male	42	NA	NA	NA	NA	NA	NA	NA	NA	NA	NA	NA	NA	1	3	0	2	NA	NA	0	NA	NA	NA	NA	NA	2	NA	NA	NA	NA	NA	NA	NA	NA	NA	NA	NA	NA	NA
487	146	NA	NA	NA	NA	NA	NA	NA	NA	male	70	NA	NA	NA	NA	NA	NA	NA	NA	NA	NA	NA	NA	1	3	1	0	NA	NA	0	NA	NA	NA	NA	NA	2	NA	NA	NA	NA	NA	NA	NA	NA	NA	NA	NA	NA	NA
488	147	NA	NA	NA	NA	NA	NA	NA	NA	female	147	NA	NA	NA	NA	NA	NA	NA	NA	NA	NA	NA	NA	1	4	1	0	NA	NA	0	NA	NA	NA	NA	NA	2	NA	NA	NA	NA	NA	NA	NA	NA	NA	NA	NA	NA	NA
489	148	NA	NA	NA	NA	NA	NA	NA	NA	female	50	NA	NA	NA	NA	NA	NA	NA	NA	NA	NA	NA	NA	1	3	1	0	NA	NA	0	NA	NA	NA	NA	NA	2	NA	NA	NA	NA	NA	NA	NA	NA	NA	NA	NA	NA	NA
491	150	NA	NA	NA	NA	NA	NA	NA	NA	female	32	NA	NA	NA	NA	NA	NA	NA	NA	NA	NA	NA	NA	1	NA	NA	NA	NA	NA	NA	NA	NA	NA	NA	NA	2	NA	NA	NA	NA	NA	NA	NA	NA	NA	NA	NA	NA	NA
493	152	NA	NA	NA	NA	NA	NA	NA	NA	male	32	NA	NA	NA	NA	NA	NA	NA	NA	NA	NA	NA	NA	1	1	0	0	NA	NA	0	NA	NA	NA	NA	NA	2	NA	NA	NA	NA	NA	NA	NA	NA	NA	NA	NA	NA	NA
494	153	NA	NA	NA	NA	NA	NA	NA	NA	female	54	NA	NA	NA	NA	NA	NA	NA	NA	NA	NA	NA	NA	1	NA	NA	NA	NA	NA	NA	NA	NA	NA	NA	NA	2	NA	NA	NA	NA	NA	NA	NA	NA	NA	NA	NA	NA	NA
495	154	NA	NA	NA	NA	NA	NA	NA	NA	male	35	NA	NA	NA	NA	NA	NA	NA	NA	NA	NA	NA	NA	1	3	2	3	NA	NA	4	NA	NA	NA	NA	NA	2	NA	NA	NA	NA	NA	NA	NA	NA	NA	NA	NA	NA	NA
496	155	NA	NA	NA	NA	NA	NA	NA	NA	male	28	NA	NA	NA	NA	NA	NA	NA	NA	NA	NA	NA	NA	1	NA	NA	NA	NA	NA	NA	NA	NA	NA	NA	NA	2	NA	NA	NA	NA	NA	NA	NA	NA	NA	NA	NA	NA	NA
498	157	NA	NA	NA	NA	NA	NA	NA	NA	male	25	NA	NA	NA	NA	NA	NA	NA	NA	NA	NA	NA	NA	1	3	0	0	NA	NA	0	NA	NA	NA	NA	NA	2	NA	NA	NA	NA	NA	NA	NA	NA	NA	NA	NA	NA	NA
499	158	NA	NA	NA	NA	NA	NA	NA	NA	female	22	NA	NA	NA	NA	NA	NA	NA	NA	NA	NA	NA	NA	1	NA	NA	NA	NA	NA	NA	NA	NA	NA	NA	NA	2	NA	NA	NA	NA	NA	NA	NA	NA	NA	NA	NA	NA	NA
500	159	NA	NA	NA	NA	NA	NA	NA	NA	female	42	NA	NA	NA	NA	NA	NA	NA	NA	NA	NA	NA	NA	1	1	0	0	NA	NA	0	NA	NA	NA	NA	NA	2	NA	NA	NA	NA	NA	NA	NA	NA	NA	NA	NA	NA	NA
501	160	NA	NA	NA	NA	NA	NA	NA	NA	male	34	NA	NA	NA	NA	NA	NA	NA	NA	NA	NA	NA	NA	1	1	2	1	NA	NA	1	NA	NA	NA	NA	NA	2	NA	NA	NA	NA	NA	NA	NA	NA	NA	NA	NA	NA	NA
502	161	NA	NA	NA	NA	NA	NA	NA	NA	female	63	NA	NA	NA	NA	NA	NA	NA	NA	NA	NA	NA	NA	1	4	0	0	NA	NA	1	NA	NA	NA	NA	NA	2	NA	NA	NA	NA	NA	NA	NA	NA	NA	NA	NA	NA	NA
503	162	NA	NA	NA	NA	NA	NA	NA	NA	female	60	NA	NA	NA	NA	NA	NA	NA	NA	NA	NA	NA	NA	1	1	0	0	NA	NA	0	NA	NA	NA	NA	NA	2	NA	NA	NA	NA	NA	NA	NA	NA	NA	NA	NA	NA	NA
504	163	NA	NA	NA	NA	NA	NA	NA	NA	male	45	NA	NA	NA	NA	NA	NA	NA	NA	NA	NA	NA	NA	1	4	2	1	NA	NA	2	NA	NA	NA	NA	NA	2	NA	NA	NA	NA	NA	NA	NA	NA	NA	NA	NA	NA	NA
505	164	NA	NA	NA	NA	NA	NA	NA	NA	female	46	NA	NA	NA	NA	NA	NA	NA	NA	NA	NA	NA	NA	1	2	0	0	NA	NA	0	NA	NA	NA	NA	NA	2	NA	NA	NA	NA	NA	NA	NA	NA	NA	NA	NA	NA	NA
506	165	NA	NA	NA	NA	NA	NA	NA	NA	female	34	NA	NA	NA	NA	NA	NA	NA	NA	NA	NA	NA	NA	1	NA	NA	NA	NA	NA	NA	NA	NA	NA	NA	NA	2	NA	NA	NA	NA	NA	NA	NA	NA	NA	NA	NA	NA	NA
507	166	NA	NA	NA	NA	NA	NA	NA	NA	male	34	NA	NA	NA	NA	NA	NA	NA	NA	NA	NA	NA	NA	1	1	1	2	NA	NA	1	NA	NA	NA	NA	NA	2	NA	NA	NA	NA	NA	NA	NA	NA	NA	NA	NA	NA	NA
508	167	NA	NA	NA	NA	NA	NA	NA	NA	female	55	NA	NA	NA	NA	NA	NA	NA	NA	NA	NA	NA	NA	1	3	0	0	NA	NA	0	NA	NA	NA	NA	NA	2	NA	NA	NA	NA	NA	NA	NA	NA	NA	NA	NA	NA	NA
509	168	NA	NA	NA	NA	NA	NA	NA	NA	female	37	NA	NA	NA	NA	NA	NA	NA	NA	NA	NA	NA	NA	1	NA	NA	NA	NA	NA	NA	NA	NA	NA	NA	NA	2	NA	NA	NA	NA	NA	NA	NA	NA	NA	NA	NA	NA	NA
511	170	NA	NA	NA	NA	NA	NA	NA	NA	female	36	NA	NA	NA	NA	NA	NA	NA	NA	NA	NA	NA	NA	1	1	1	0	NA	NA	0	NA	NA	NA	NA	NA	2	NA	NA	NA	NA	NA	NA	NA	NA	NA	NA	NA	NA	NA
512	171	NA	NA	NA	NA	NA	NA	NA	NA	female	56	NA	NA	NA	NA	NA	NA	NA	NA	NA	NA	NA	NA	1	NA	NA	NA	NA	NA	NA	NA	NA	NA	NA	NA	2	NA	NA	NA	NA	NA	NA	NA	NA	NA	NA	NA	NA	NA
514	173	NA	NA	NA	NA	NA	NA	NA	NA	female	42	NA	NA	NA	NA	NA	NA	NA	NA	NA	NA	NA	NA	1	2	2	0	NA	NA	4	NA	NA	NA	NA	NA	2	NA	NA	NA	NA	NA	NA	NA	NA	NA	NA	NA	NA	NA
515	174	NA	NA	NA	NA	NA	NA	NA	NA	female	72	NA	NA	NA	NA	NA	NA	NA	NA	NA	NA	NA	NA	1	NA	NA	NA	NA	NA	NA	NA	NA	NA	NA	NA	2	NA	NA	NA	NA	NA	NA	NA	NA	NA	NA	NA	NA	NA
516	175	NA	NA	NA	NA	NA	NA	NA	NA	male	35	NA	NA	NA	NA	NA	NA	NA	NA	NA	NA	NA	NA	1	1	0	0	NA	NA	0	NA	NA	NA	NA	NA	2	NA	NA	NA	NA	NA	NA	NA	NA	NA	NA	NA	NA	NA
517	176	NA	NA	NA	NA	NA	NA	NA	NA	female	49	NA	NA	NA	NA	NA	NA	NA	NA	NA	NA	NA	NA	1	3	1	3	NA	NA	0	NA	NA	NA	NA	NA	2	NA	NA	NA	NA	NA	NA	NA	NA	NA	NA	NA	NA	NA
518	177	NA	NA	NA	NA	NA	NA	NA	NA	female	21	NA	NA	NA	NA	NA	NA	NA	NA	NA	NA	NA	NA	1	1	0	0	NA	NA	0	NA	NA	NA	NA	NA	2	NA	NA	NA	NA	NA	NA	NA	NA	NA	NA	NA	NA	NA
519	178	NA	NA	NA	NA	NA	NA	NA	NA	male	34	NA	NA	NA	NA	NA	NA	NA	NA	NA	NA	NA	NA	1	3	1	2	NA	NA	0	NA	NA	NA	NA	NA	2	NA	NA	NA	NA	NA	NA	NA	NA	NA	NA	NA	NA	NA
521	180	NA	NA	NA	NA	NA	NA	NA	NA	female	45	NA	NA	NA	NA	NA	NA	NA	NA	NA	NA	NA	NA	1	3	1	2	NA	NA	1	NA	NA	NA	NA	NA	2	NA	NA	NA	NA	NA	NA	NA	NA	NA	NA	NA	NA	NA
522	181	NA	NA	NA	NA	NA	NA	NA	NA	male	23	NA	NA	NA	NA	NA	NA	NA	NA	NA	NA	NA	NA	1	2	1	0	NA	NA	0	NA	NA	NA	NA	NA	2	NA	NA	NA	NA	NA	NA	NA	NA	NA	NA	NA	NA	NA
523	182	NA	NA	NA	NA	NA	NA	NA	NA	female	19	NA	NA	NA	NA	NA	NA	NA	NA	NA	NA	NA	NA	1	NA	NA	NA	NA	NA	NA	NA	NA	NA	NA	NA	2	NA	NA	NA	NA	NA	NA	NA	NA	NA	NA	NA	NA	NA
524	183	NA	NA	NA	NA	NA	NA	NA	NA	female	47	NA	NA	NA	NA	NA	NA	NA	NA	NA	NA	NA	NA	1	1	0	0	NA	NA	0	NA	NA	NA	NA	NA	2	NA	NA	NA	NA	NA	NA	NA	NA	NA	NA	NA	NA	NA
525	184	NA	NA	NA	NA	NA	NA	NA	NA	female	40	NA	NA	NA	NA	NA	NA	NA	NA	NA	NA	NA	NA	1	NA	NA	NA	NA	NA	NA	NA	NA	NA	NA	NA	2	NA	NA	NA	NA	NA	NA	NA	NA	NA	NA	NA	NA	NA
528	187	NA	NA	NA	NA	NA	NA	NA	NA	male	38	NA	NA	NA	NA	NA	NA	NA	NA	NA	NA	NA	NA	1	4	0	0	NA	NA	0	NA	NA	NA	NA	NA	2	NA	NA	NA	NA	NA	NA	NA	NA	NA	NA	NA	NA	NA
529	188	NA	NA	NA	NA	NA	NA	NA	NA	male	33	NA	NA	NA	NA	NA	NA	NA	NA	NA	NA	NA	NA	1	NA	NA	NA	NA	NA	NA	NA	NA	NA	NA	NA	2	NA	NA	NA	NA	NA	NA	NA	NA	NA	NA	NA	NA	NA
530	189	NA	NA	NA	NA	NA	NA	NA	NA	male	40	NA	NA	NA	NA	NA	NA	NA	NA	NA	NA	NA	NA	1	NA	NA	NA	NA	NA	NA	NA	NA	NA	NA	NA	2	NA	NA	NA	NA	NA	NA	NA	NA	NA	NA	NA	NA	NA
531	190	NA	NA	NA	NA	NA	NA	NA	NA	female	32	NA	NA	NA	NA	NA	NA	NA	NA	NA	NA	NA	NA	1	NA	NA	NA	NA	NA	NA	NA	NA	NA	NA	NA	2	NA	NA	NA	NA	NA	NA	NA	NA	NA	NA	NA	NA	NA
532	191	NA	NA	NA	NA	NA	NA	NA	NA	male	40	NA	NA	NA	NA	NA	NA	NA	NA	NA	NA	NA	NA	1	4	0	2	NA	NA	2	NA	NA	NA	NA	NA	2	NA	NA	NA	NA	NA	NA	NA	NA	NA	NA	NA	NA	NA
533	192	NA	NA	NA	NA	NA	NA	NA	NA	male	28	NA	NA	NA	NA	NA	NA	NA	NA	NA	NA	NA	NA	1	4	0	2	NA	NA	0	NA	NA	NA	NA	NA	2	NA	NA	NA	NA	NA	NA	NA	NA	NA	NA	NA	NA	NA
534	193	NA	NA	NA	NA	NA	NA	NA	NA	female	51	NA	NA	NA	NA	NA	NA	NA	NA	NA	NA	NA	NA	1	3	1	2	NA	NA	0	NA	NA	NA	NA	NA	2	NA	NA	NA	NA	NA	NA	NA	NA	NA	NA	NA	NA	NA
535	194	NA	NA	NA	NA	NA	NA	NA	NA	female	40	NA	NA	NA	NA	NA	NA	NA	NA	NA	NA	NA	NA	1	1	0	1	NA	NA	0	NA	NA	NA	NA	NA	2	NA	NA	NA	NA	NA	NA	NA	NA	NA	NA	NA	NA	NA
536	195	NA	NA	NA	NA	NA	NA	NA	NA	female	50	NA	NA	NA	NA	NA	NA	NA	NA	NA	NA	NA	NA	1	3	2	1	NA	NA	0	NA	NA	NA	NA	NA	2	NA	NA	NA	NA	NA	NA	NA	NA	NA	NA	NA	NA	NA
537	196	NA	NA	NA	NA	NA	NA	NA	NA	female	41	NA	NA	NA	NA	NA	NA	NA	NA	NA	NA	NA	NA	1	NA	NA	NA	NA	NA	NA	NA	NA	NA	NA	NA	2	NA	NA	NA	NA	NA	NA	NA	NA	NA	NA	NA	NA	NA
538	197	NA	NA	NA	NA	NA	NA	NA	NA	female	57	NA	NA	NA	NA	NA	NA	NA	NA	NA	NA	NA	NA	1	1	0	0	NA	NA	0	NA	NA	NA	NA	NA	2	NA	NA	NA	NA	NA	NA	NA	NA	NA	NA	NA	NA	NA
539	198	NA	NA	NA	NA	NA	NA	NA	NA	female	40	NA	NA	NA	NA	NA	NA	NA	NA	NA	NA	NA	NA	1	NA	NA	NA	NA	NA	NA	NA	NA	NA	NA	0	2	NA	NA	NA	NA	NA	NA	NA	NA	NA	NA	NA	NA	NA
540	199	NA	NA	NA	NA	NA	NA	NA	NA	female	35	NA	NA	NA	NA	NA	NA	NA	NA	NA	NA	NA	NA	1	1	0	0	NA	NA	0	NA	NA	NA	NA	NA	2	NA	NA	NA	NA	NA	NA	NA	NA	NA	NA	NA	NA	NA
541	200	NA	NA	NA	NA	NA	NA	NA	NA	female	51	NA	NA	NA	NA	NA	NA	NA	NA	NA	NA	NA	NA	1	1	0	0	NA	NA	0	NA	NA	NA	NA	NA	2	NA	NA	NA	NA	NA	NA	NA	NA	NA	NA	NA	NA	NA
543	202	NA	NA	NA	NA	NA	NA	NA	NA	male	40	NA	NA	NA	NA	NA	NA	NA	NA	NA	NA	NA	NA	1	1	1	0	NA	NA	0	NA	NA	NA	NA	NA	2	NA	NA	NA	NA	NA	NA	NA	NA	NA	NA	NA	NA	NA
544	203	NA	NA	NA	NA	NA	NA	NA	NA	male	27	NA	NA	NA	NA	NA	NA	NA	NA	NA	NA	NA	NA	1	3	1	0	NA	NA	0	NA	NA	NA	NA	NA	2	NA	NA	NA	NA	NA	NA	NA	NA	NA	NA	NA	NA	NA
545	204	NA	NA	NA	NA	NA	NA	NA	NA	male	26	NA	NA	NA	NA	NA	NA	NA	NA	NA	NA	NA	NA	1	1	0	0	NA	NA	0	NA	NA	NA	NA	NA	2	NA	NA	NA	NA	NA	NA	NA	NA	NA	NA	NA	NA	NA
546	205	NA	NA	NA	NA	NA	NA	NA	NA	male	27	NA	NA	NA	NA	NA	NA	NA	NA	NA	NA	NA	NA	1	2	1	1	NA	NA	0	NA	NA	NA	NA	NA	2	NA	NA	NA	NA	NA	NA	NA	NA	NA	NA	NA	NA	NA
547	206	NA	NA	NA	NA	NA	NA	NA	NA	male	64	NA	NA	NA	NA	NA	NA	NA	NA	NA	NA	NA	NA	1	4	1	1	NA	NA	0	NA	NA	NA	NA	NA	2	NA	NA	NA	NA	NA	NA	NA	NA	NA	NA	NA	NA	NA
548	207	NA	NA	NA	NA	NA	NA	NA	NA	female	30	NA	NA	NA	NA	NA	NA	NA	NA	NA	NA	NA	NA	1	3	0	0	NA	NA	3	NA	NA	NA	NA	NA	2	NA	NA	NA	NA	NA	NA	NA	NA	NA	NA	NA	NA	NA
550	209	NA	NA	NA	NA	NA	NA	NA	NA	female	53	NA	NA	NA	NA	NA	NA	NA	NA	NA	NA	NA	NA	1	NA	NA	NA	NA	NA	NA	NA	NA	NA	NA	NA	2	NA	NA	NA	NA	NA	NA	NA	NA	NA	NA	NA	NA	NA
551	210	NA	NA	NA	NA	NA	NA	NA	NA	male	62	NA	NA	NA	NA	NA	NA	NA	NA	NA	NA	NA	NA	1	3	0	0	NA	NA	0	NA	NA	NA	NA	NA	2	NA	NA	NA	NA	NA	NA	NA	NA	NA	NA	NA	NA	NA
552	211	NA	NA	NA	NA	NA	NA	NA	NA	male	57	NA	NA	NA	NA	NA	NA	NA	NA	NA	NA	NA	NA	1	4	1	0	NA	NA	0	NA	NA	NA	NA	NA	2	NA	NA	NA	NA	NA	NA	NA	NA	NA	NA	NA	NA	NA
553	212	NA	NA	NA	NA	NA	NA	NA	NA	female	37	NA	NA	NA	NA	NA	NA	NA	NA	NA	NA	NA	NA	1	4	4	4	NA	NA	4	NA	NA	NA	NA	NA	2	NA	NA	NA	NA	NA	NA	NA	NA	NA	NA	NA	NA	NA
557	216	NA	NA	NA	NA	NA	NA	NA	NA	male	29	NA	NA	NA	NA	NA	NA	NA	NA	NA	NA	NA	NA	1	2	0	0	NA	NA	0	NA	NA	NA	NA	6	2	NA	NA	NA	NA	NA	NA	NA	NA	NA	NA	NA	NA	NA
558	217	NA	NA	NA	NA	NA	NA	NA	NA	male	44	NA	NA	NA	NA	NA	NA	NA	NA	NA	NA	NA	NA	1	3	0	0	NA	NA	0	NA	NA	NA	NA	5	2	NA	NA	NA	NA	NA	NA	NA	NA	NA	NA	NA	NA	NA
559	218	NA	NA	NA	NA	NA	NA	NA	NA	female	64	NA	NA	NA	NA	NA	NA	NA	NA	NA	NA	NA	NA	1	NA	NA	NA	NA	NA	NA	NA	NA	NA	NA	NA	2	NA	NA	NA	NA	NA	NA	NA	NA	NA	NA	NA	NA	NA
562	221	NA	NA	NA	NA	NA	NA	NA	NA	female	37	NA	NA	NA	NA	NA	NA	NA	NA	NA	NA	NA	NA	1	4	0	0	NA	NA	4	NA	NA	NA	NA	4	2	NA	NA	NA	NA	NA	NA	NA	NA	NA	NA	NA	NA	NA
563	222	NA	NA	NA	NA	NA	NA	NA	NA	male	35	NA	NA	NA	NA	NA	NA	NA	NA	NA	NA	NA	NA	1	4	1	2	NA	NA	4	NA	NA	NA	NA	21	2	NA	NA	NA	NA	NA	NA	NA	NA	NA	NA	NA	NA	NA
564	223	NA	NA	NA	NA	NA	NA	NA	NA	female	52	NA	NA	NA	NA	NA	NA	NA	NA	NA	NA	NA	NA	1	3	0	0	NA	NA	0	NA	NA	NA	NA	3	2	NA	NA	NA	NA	NA	NA	NA	NA	NA	NA	NA	NA	NA
566	225	NA	NA	NA	NA	NA	NA	NA	NA	male	30	NA	NA	NA	NA	NA	NA	NA	NA	NA	NA	NA	NA	1	4	1	2	NA	NA	4	NA	NA	NA	NA	21	2	NA	NA	NA	NA	NA	NA	NA	NA	NA	NA	NA	NA	NA
567	226	NA	NA	NA	NA	NA	NA	NA	NA	female	56	NA	NA	NA	NA	NA	NA	NA	NA	NA	NA	NA	NA	1	1	0	0	NA	NA	0	NA	NA	NA	NA	5	2	NA	NA	NA	NA	NA	NA	NA	NA	NA	NA	NA	NA	NA
568	227	NA	NA	NA	NA	NA	NA	NA	NA	male	37	NA	NA	NA	NA	NA	NA	NA	NA	NA	NA	NA	NA	1	4	1	3	NA	NA	4	NA	NA	NA	NA	30	2	NA	NA	NA	NA	NA	NA	NA	NA	NA	NA	NA	NA	NA
569	228	NA	NA	NA	NA	NA	NA	NA	NA	female	73	NA	NA	NA	NA	NA	NA	NA	NA	NA	NA	NA	NA	1	1	0	0	NA	NA	0	NA	NA	NA	NA	1	2	NA	NA	NA	NA	NA	NA	NA	NA	NA	NA	NA	NA	NA
570	229	NA	NA	NA	NA	NA	NA	NA	NA	female	28	NA	NA	NA	NA	NA	NA	NA	NA	NA	NA	NA	NA	1	1	0	0	NA	NA	0	NA	NA	NA	NA	1	2	NA	NA	NA	NA	NA	NA	NA	NA	NA	NA	NA	NA	NA
571	230	NA	NA	NA	NA	NA	NA	NA	NA	male	28	NA	NA	NA	NA	NA	NA	NA	NA	NA	NA	NA	NA	1	2	1	0	NA	NA	0	NA	NA	NA	NA	7	2	NA	NA	NA	NA	NA	NA	NA	NA	NA	NA	NA	NA	NA
572	231	NA	NA	NA	NA	NA	NA	NA	NA	female	35	NA	NA	NA	NA	NA	NA	NA	NA	NA	NA	NA	NA	1	1	0	0	NA	NA	0	NA	NA	NA	NA	1	2	NA	NA	NA	NA	NA	NA	NA	NA	NA	NA	NA	NA	NA
573	232	NA	NA	NA	NA	NA	NA	NA	NA	female	42	NA	NA	NA	NA	NA	NA	NA	NA	NA	NA	NA	NA	1	NA	NA	NA	NA	NA	NA	NA	NA	NA	NA	0	2	NA	NA	NA	NA	NA	NA	NA	NA	NA	NA	NA	NA	NA
575	234	NA	NA	NA	NA	NA	NA	NA	NA	female	29	NA	NA	NA	NA	NA	NA	NA	NA	NA	NA	NA	NA	1	NA	NA	NA	NA	NA	NA	NA	NA	NA	NA	NA	2	NA	NA	NA	NA	NA	NA	NA	NA	NA	NA	NA	NA	NA
576	235	NA	NA	NA	NA	NA	NA	NA	NA	female	57	NA	NA	NA	NA	NA	NA	NA	NA	NA	NA	NA	NA	1	NA	NA	NA	NA	NA	NA	NA	NA	NA	NA	NA	2	NA	NA	NA	NA	NA	NA	NA	NA	NA	NA	NA	NA	NA
578	237	NA	NA	NA	NA	NA	NA	NA	NA	male	25	NA	NA	NA	NA	NA	NA	NA	NA	NA	NA	NA	NA	1	2	2	0	NA	NA	3	NA	NA	NA	NA	9	2	NA	NA	NA	NA	NA	NA	NA	NA	NA	NA	NA	NA	NA
580	239	NA	NA	NA	NA	NA	NA	NA	NA	female	39	NA	NA	NA	NA	NA	NA	NA	NA	NA	NA	NA	NA	1	NA	NA	NA	NA	NA	NA	NA	NA	NA	NA	0	2	NA	NA	NA	NA	NA	NA	NA	NA	NA	NA	NA	NA	NA
581	240	NA	NA	NA	NA	NA	NA	NA	NA	male	47	NA	NA	NA	NA	NA	NA	NA	NA	NA	NA	NA	NA	1	2	1	0	NA	NA	1	NA	NA	NA	NA	7	2	NA	NA	NA	NA	NA	NA	NA	NA	NA	NA	NA	NA	NA
582	241	NA	NA	NA	NA	NA	NA	NA	NA	male	77	NA	NA	NA	NA	NA	NA	NA	NA	NA	NA	NA	NA	1	3	0	0	NA	NA	0	NA	NA	NA	NA	3	2	NA	NA	NA	NA	NA	NA	NA	NA	NA	NA	NA	NA	NA
583	242	NA	NA	NA	NA	NA	NA	NA	NA	female	41	NA	NA	NA	NA	NA	NA	NA	NA	NA	NA	NA	NA	1	1	1	1	NA	NA	1	NA	NA	NA	NA	7	2	NA	NA	NA	NA	NA	NA	NA	NA	NA	NA	NA	NA	NA
586	245	NA	NA	NA	NA	NA	NA	NA	NA	male	50	NA	NA	NA	NA	NA	NA	NA	NA	NA	NA	NA	NA	1	NA	NA	NA	NA	NA	NA	NA	NA	NA	NA	0	2	NA	NA	NA	NA	NA	NA	NA	NA	NA	NA	NA	NA	NA
587	246	NA	NA	NA	NA	NA	NA	NA	NA	female	47	NA	NA	NA	NA	NA	NA	NA	NA	NA	NA	NA	NA	1	4	1	0	NA	NA	0	NA	NA	NA	NA	7	2	NA	NA	NA	NA	NA	NA	NA	NA	NA	NA	NA	NA	NA
589	248	NA	NA	NA	NA	NA	NA	NA	NA	male	60	NA	NA	NA	NA	NA	NA	NA	NA	NA	NA	NA	NA	1	NA	NA	NA	NA	NA	NA	NA	NA	NA	NA	0	2	NA	NA	NA	NA	NA	NA	NA	NA	NA	NA	NA	NA	NA
590	249	NA	NA	NA	NA	NA	NA	NA	NA	female	47	NA	NA	NA	NA	NA	NA	NA	NA	NA	NA	NA	NA	1	NA	NA	NA	NA	NA	NA	NA	NA	NA	NA	0	2	NA	NA	NA	NA	NA	NA	NA	NA	NA	NA	NA	NA	NA
591	250	NA	NA	NA	NA	NA	NA	NA	NA	female	23	NA	NA	NA	NA	NA	NA	NA	NA	NA	NA	NA	NA	1	1	0	0	NA	NA	0	NA	NA	NA	NA	1	2	NA	NA	NA	NA	NA	NA	NA	NA	NA	NA	NA	NA	NA
593	252	NA	NA	NA	NA	NA	NA	NA	NA	male	29	NA	NA	NA	NA	NA	NA	NA	NA	NA	NA	NA	NA	1	3	1	0	NA	NA	0	NA	NA	NA	NA	9	2	NA	NA	NA	NA	NA	NA	NA	NA	NA	NA	NA	NA	NA
594	253	NA	NA	NA	NA	NA	NA	NA	NA	male	25	NA	NA	NA	NA	NA	NA	NA	NA	NA	NA	NA	NA	1	2	2	2	NA	NA	1	NA	NA	NA	NA	14	2	NA	NA	NA	NA	NA	NA	NA	NA	NA	NA	NA	NA	NA
596	255	NA	NA	NA	NA	NA	NA	NA	NA	female	39	NA	NA	NA	NA	NA	NA	NA	NA	NA	NA	NA	NA	1	4	3	4	NA	NA	2	NA	NA	NA	NA	25	2	NA	NA	NA	NA	NA	NA	NA	NA	NA	NA	NA	NA	NA
598	257	NA	NA	NA	NA	NA	NA	NA	NA	male	28	NA	NA	NA	NA	NA	NA	NA	NA	NA	NA	NA	NA	1	2	3	3	NA	NA	3	NA	NA	NA	NA	29	2	NA	NA	NA	NA	NA	NA	NA	NA	NA	NA	NA	NA	NA
602	261	NA	NA	NA	NA	NA	NA	NA	NA	male	23	NA	NA	NA	NA	NA	NA	NA	NA	NA	NA	NA	NA	1	NA	NA	NA	NA	NA	NA	NA	NA	NA	NA	0	2	NA	NA	NA	NA	NA	NA	NA	NA	NA	NA	NA	NA	NA
603	262	NA	NA	NA	NA	NA	NA	NA	NA	female	70	NA	NA	NA	NA	NA	NA	NA	NA	NA	NA	NA	NA	1	NA	NA	NA	NA	NA	NA	NA	NA	NA	NA	0	2	NA	NA	NA	NA	NA	NA	NA	NA	NA	NA	NA	NA	NA
604	263	NA	NA	NA	NA	NA	NA	NA	NA	male	28	NA	NA	NA	NA	NA	NA	NA	NA	NA	NA	NA	NA	1	3	0	0	NA	NA	0	NA	NA	NA	NA	13	2	NA	NA	NA	NA	NA	NA	NA	NA	NA	NA	NA	NA	NA
606	265	NA	NA	NA	NA	NA	NA	NA	NA	male	54	NA	NA	NA	NA	NA	NA	NA	NA	NA	NA	NA	NA	1	2	0	0	NA	NA	1	NA	NA	NA	NA	3	2	NA	NA	NA	NA	NA	NA	NA	NA	NA	NA	NA	NA	NA
607	266	NA	NA	NA	NA	NA	NA	NA	NA	female	68	NA	NA	NA	NA	NA	NA	NA	NA	NA	NA	NA	NA	1	2	1	0	NA	NA	0	NA	NA	NA	NA	3	2	NA	NA	NA	NA	NA	NA	NA	NA	NA	NA	NA	NA	NA
609	268	NA	NA	NA	NA	NA	NA	NA	NA	female	58	NA	NA	NA	NA	NA	NA	NA	NA	NA	NA	NA	NA	1	NA	NA	NA	NA	NA	NA	NA	NA	NA	NA	0	2	NA	NA	NA	NA	NA	NA	NA	NA	NA	NA	NA	NA	NA
611	270	NA	NA	NA	NA	NA	NA	NA	NA	male	70	NA	NA	NA	NA	NA	NA	NA	NA	NA	NA	NA	NA	1	NA	NA	NA	NA	NA	NA	NA	NA	NA	NA	0	2	NA	NA	NA	NA	NA	NA	NA	NA	NA	NA	NA	NA	NA
612	271	NA	NA	NA	NA	NA	NA	NA	NA	female	63	NA	NA	NA	NA	NA	NA	NA	NA	NA	NA	NA	NA	1	NA	NA	NA	NA	NA	NA	NA	NA	NA	NA	0	2	NA	NA	NA	NA	NA	NA	NA	NA	NA	NA	NA	NA	NA
613	272	NA	NA	NA	NA	NA	NA	NA	NA	female	24	NA	NA	NA	NA	NA	NA	NA	NA	NA	NA	NA	NA	1	NA	NA	NA	NA	NA	NA	NA	NA	NA	NA	0	2	NA	NA	NA	NA	NA	NA	NA	NA	NA	NA	NA	NA	NA
614	273	NA	NA	NA	NA	NA	NA	NA	NA	female	30	NA	NA	NA	NA	NA	NA	NA	NA	NA	NA	NA	NA	1	3	1	2	NA	NA	0	NA	NA	NA	NA	11	2	NA	NA	NA	NA	NA	NA	NA	NA	NA	NA	NA	NA	NA
615	274	NA	NA	NA	NA	NA	NA	NA	NA	male	55	NA	NA	NA	NA	NA	NA	NA	NA	NA	NA	NA	NA	1	3	1	0	NA	NA	0	NA	NA	NA	NA	13	2	NA	NA	NA	NA	NA	NA	NA	NA	NA	NA	NA	NA	NA
616	275	NA	NA	NA	NA	NA	NA	NA	NA	male	62	NA	NA	NA	NA	NA	NA	NA	NA	NA	NA	NA	NA	1	3	1	3	NA	NA	2	NA	NA	NA	NA	11	2	NA	NA	NA	NA	NA	NA	NA	NA	NA	NA	NA	NA	NA
618	277	NA	NA	NA	NA	NA	NA	NA	NA	female	56	NA	NA	NA	NA	NA	NA	NA	NA	NA	NA	NA	NA	1	4	0	0	NA	NA	0	NA	NA	NA	NA	4	2	NA	NA	NA	NA	NA	NA	NA	NA	NA	NA	NA	NA	NA
619	278	NA	NA	NA	NA	NA	NA	NA	NA	female	60	NA	NA	NA	NA	NA	NA	NA	NA	NA	NA	NA	NA	1	NA	NA	NA	NA	NA	NA	NA	NA	NA	NA	0	2	NA	NA	NA	NA	NA	NA	NA	NA	NA	NA	NA	NA	NA
620	279	NA	NA	NA	NA	NA	NA	NA	NA	female	54	NA	NA	NA	NA	NA	NA	NA	NA	NA	NA	NA	NA	1	1	1	0	NA	NA	0	NA	NA	NA	NA	6	2	NA	NA	NA	NA	NA	NA	NA	NA	NA	NA	NA	NA	NA
622	281	NA	NA	NA	NA	NA	NA	NA	NA	male	25	NA	NA	NA	NA	NA	NA	NA	NA	NA	NA	NA	NA	1	2	1	0	NA	NA	0	NA	NA	NA	NA	7	2	NA	NA	NA	NA	NA	NA	NA	NA	NA	NA	NA	NA	NA
623	282	NA	NA	NA	NA	NA	NA	NA	NA	female	57	NA	NA	NA	NA	NA	NA	NA	NA	NA	NA	NA	NA	1	NA	NA	NA	NA	NA	NA	NA	NA	NA	NA	0	2	NA	NA	NA	NA	NA	NA	NA	NA	NA	NA	NA	NA	NA
624	283	NA	NA	NA	NA	NA	NA	NA	NA	female	48	NA	NA	NA	NA	NA	NA	NA	NA	NA	NA	NA	NA	1	2	0	1	NA	NA	1	NA	NA	NA	NA	7	2	NA	NA	NA	NA	NA	NA	NA	NA	NA	NA	NA	NA	NA
625	284	NA	NA	NA	NA	NA	NA	NA	NA	female	40	NA	NA	NA	NA	NA	NA	NA	NA	NA	NA	NA	NA	1	2	0	0	NA	NA	0	NA	NA	NA	NA	4	2	NA	NA	NA	NA	NA	NA	NA	NA	NA	NA	NA	NA	NA
626	285	NA	NA	NA	NA	NA	NA	NA	NA	female	74	NA	NA	NA	NA	NA	NA	NA	NA	NA	NA	NA	NA	1	1	1	0	NA	NA	0	NA	NA	NA	NA	2	2	NA	NA	NA	NA	NA	NA	NA	NA	NA	NA	NA	NA	NA
628	287	NA	NA	NA	NA	NA	NA	NA	NA	female	59	NA	NA	NA	NA	NA	NA	NA	NA	NA	NA	NA	NA	1	4	0	1	NA	NA	1	NA	NA	NA	NA	14	2	NA	NA	NA	NA	NA	NA	NA	NA	NA	NA	NA	NA	NA
629	288	NA	NA	NA	NA	NA	NA	NA	NA	male	35	NA	NA	NA	NA	NA	NA	NA	NA	NA	NA	NA	NA	1	NA	NA	NA	NA	NA	NA	NA	NA	NA	NA	0	2	NA	NA	NA	NA	NA	NA	NA	NA	NA	NA	NA	NA	NA
631	290	NA	NA	NA	NA	NA	NA	NA	NA	female	33	NA	NA	NA	NA	NA	NA	NA	NA	NA	NA	NA	NA	1	1	1	1	NA	NA	0	NA	NA	NA	NA	3	2	NA	NA	NA	NA	NA	NA	NA	NA	NA	NA	NA	NA	NA
632	291	NA	NA	NA	NA	NA	NA	NA	NA	female	33	NA	NA	NA	NA	NA	NA	NA	NA	NA	NA	NA	NA	1	NA	NA	NA	NA	NA	NA	NA	NA	NA	NA	0	2	NA	NA	NA	NA	NA	NA	NA	NA	NA	NA	NA	NA	NA
633	292	NA	NA	NA	NA	NA	NA	NA	NA	male	73	NA	NA	NA	NA	NA	NA	NA	NA	NA	NA	NA	NA	1	3	1	0	NA	NA	0	NA	NA	NA	NA	9	2	NA	NA	NA	NA	NA	NA	NA	NA	NA	NA	NA	NA	NA
634	293	NA	NA	NA	NA	NA	NA	NA	NA	male	36	NA	NA	NA	NA	NA	NA	NA	NA	NA	NA	NA	NA	1	2	0	0	NA	NA	0	NA	NA	NA	NA	2	2	NA	NA	NA	NA	NA	NA	NA	NA	NA	NA	NA	NA	NA
635	294	NA	NA	NA	NA	NA	NA	NA	NA	male	62	NA	NA	NA	NA	NA	NA	NA	NA	NA	NA	NA	NA	1	NA	NA	NA	NA	NA	NA	NA	NA	NA	NA	0	2	NA	NA	NA	NA	NA	NA	NA	NA	NA	NA	NA	NA	NA
636	295	NA	NA	NA	NA	NA	NA	NA	NA	female	45	NA	NA	NA	NA	NA	NA	NA	NA	NA	NA	NA	NA	1	NA	NA	NA	NA	NA	NA	NA	NA	NA	NA	0	2	NA	NA	NA	NA	NA	NA	NA	NA	NA	NA	NA	NA	NA
637	296	NA	NA	NA	NA	NA	NA	NA	NA	female	27	NA	NA	NA	NA	NA	NA	NA	NA	NA	NA	NA	NA	1	NA	NA	NA	NA	NA	NA	NA	NA	NA	NA	0	2	NA	NA	NA	NA	NA	NA	NA	NA	NA	NA	NA	NA	NA
638	297	NA	NA	NA	NA	NA	NA	NA	NA	male	22	NA	NA	NA	NA	NA	NA	NA	NA	NA	NA	NA	NA	1	NA	NA	NA	NA	NA	NA	NA	NA	NA	NA	0	2	NA	NA	NA	NA	NA	NA	NA	NA	NA	NA	NA	NA	NA
639	298	NA	NA	NA	NA	NA	NA	NA	NA	male	31	NA	NA	NA	NA	NA	NA	NA	NA	NA	NA	NA	NA	1	NA	NA	NA	NA	NA	NA	NA	NA	NA	NA	2	2	NA	NA	NA	NA	NA	NA	NA	NA	NA	NA	NA	NA	NA
640	299	NA	NA	NA	NA	NA	NA	NA	NA	male	78	NA	NA	NA	NA	NA	NA	NA	NA	NA	NA	NA	NA	1	3	1	1	NA	NA	2	NA	NA	NA	NA	14	2	NA	NA	NA	NA	NA	NA	NA	NA	NA	NA	NA	NA	NA
642	301	NA	NA	NA	NA	NA	NA	NA	NA	male	27	NA	NA	NA	NA	NA	NA	NA	NA	NA	NA	NA	NA	1	3	1	3	NA	NA	0	NA	NA	NA	NA	20	2	NA	NA	NA	NA	NA	NA	NA	NA	NA	NA	NA	NA	NA
643	302	NA	NA	NA	NA	NA	NA	NA	NA	male	66	NA	NA	NA	NA	NA	NA	NA	NA	NA	NA	NA	NA	1	1	0	0	NA	NA	0	NA	NA	NA	NA	1	2	NA	NA	NA	NA	NA	NA	NA	NA	NA	NA	NA	NA	NA
644	303	NA	NA	NA	NA	NA	NA	NA	NA	female	54	NA	NA	NA	NA	NA	NA	NA	NA	NA	NA	NA	NA	1	NA	NA	NA	NA	NA	NA	NA	NA	NA	NA	0	2	NA	NA	NA	NA	NA	NA	NA	NA	NA	NA	NA	NA	NA
647	306	NA	NA	NA	NA	NA	NA	NA	NA	female	55	NA	NA	NA	NA	NA	NA	NA	NA	NA	NA	NA	NA	1	1	1	2	NA	NA	1	NA	NA	NA	NA	5	2	NA	NA	NA	NA	NA	NA	NA	NA	NA	NA	NA	NA	NA
648	307	NA	NA	NA	NA	NA	NA	NA	NA	male	57	NA	NA	NA	NA	NA	NA	NA	NA	NA	NA	NA	NA	1	4	2	2	NA	NA	0	NA	NA	NA	NA	12	2	NA	NA	NA	NA	NA	NA	NA	NA	NA	NA	NA	NA	NA
649	308	NA	NA	NA	NA	NA	NA	NA	NA	male	21	NA	NA	NA	NA	NA	NA	NA	NA	NA	NA	NA	NA	1	3	2	1	NA	NA	1	NA	NA	NA	NA	15	2	NA	NA	NA	NA	NA	NA	NA	NA	NA	NA	NA	NA	NA
650	309	NA	NA	NA	NA	NA	NA	NA	NA	male	45	NA	NA	NA	NA	NA	NA	NA	NA	NA	NA	NA	NA	1	2	1	0	NA	NA	0	NA	NA	NA	NA	5	2	NA	NA	NA	NA	NA	NA	NA	NA	NA	NA	NA	NA	NA
652	311	NA	NA	NA	NA	NA	NA	NA	NA	female	56	NA	NA	NA	NA	NA	NA	NA	NA	NA	NA	NA	NA	1	3	1	0	NA	NA	0	NA	NA	NA	NA	6	2	NA	NA	NA	NA	NA	NA	NA	NA	NA	NA	NA	NA	NA
653	312	NA	NA	NA	NA	NA	NA	NA	NA	female	37	NA	NA	NA	NA	NA	NA	NA	NA	NA	NA	NA	NA	1	NA	NA	NA	NA	NA	NA	NA	NA	NA	NA	0	2	NA	NA	NA	NA	NA	NA	NA	NA	NA	NA	NA	NA	NA
654	313	NA	NA	NA	NA	NA	NA	NA	NA	male	65	NA	NA	NA	NA	NA	NA	NA	NA	NA	NA	NA	NA	1	2	1	0	NA	NA	0	NA	NA	NA	NA	3	2	NA	NA	NA	NA	NA	NA	NA	NA	NA	NA	NA	NA	NA
655	314	NA	NA	NA	NA	NA	NA	NA	NA	male	32	NA	NA	NA	NA	NA	NA	NA	NA	NA	NA	NA	NA	1	4	1	1	NA	NA	1	NA	NA	NA	NA	12	2	NA	NA	NA	NA	NA	NA	NA	NA	NA	NA	NA	NA	NA
657	316	NA	NA	NA	NA	NA	NA	NA	NA	male	37	NA	NA	NA	NA	NA	NA	NA	NA	NA	NA	NA	NA	1	NA	NA	NA	NA	NA	NA	NA	NA	NA	NA	8	2	NA	NA	NA	NA	NA	NA	NA	NA	NA	NA	NA	NA	NA
658	317	NA	NA	NA	NA	NA	NA	NA	NA	male	51	NA	NA	NA	NA	NA	NA	NA	NA	NA	NA	NA	NA	1	1	2	0	NA	NA	1	NA	NA	NA	NA	11	2	NA	NA	NA	NA	NA	NA	NA	NA	NA	NA	NA	NA	NA
659	318	NA	NA	NA	NA	NA	NA	NA	NA	male	52	NA	NA	NA	NA	NA	NA	NA	NA	NA	NA	NA	NA	1	4	4	4	NA	NA	4	NA	NA	NA	NA	24	2	NA	NA	NA	NA	NA	NA	NA	NA	NA	NA	NA	NA	NA
660	319	NA	NA	NA	NA	NA	NA	NA	NA	male	22	NA	NA	NA	NA	NA	NA	NA	NA	NA	NA	NA	NA	1	1	1	1	NA	NA	1	NA	NA	NA	NA	8	2	NA	NA	NA	NA	NA	NA	NA	NA	NA	NA	NA	NA	NA
661	320	NA	NA	NA	NA	NA	NA	NA	NA	male	48	NA	NA	NA	NA	NA	NA	NA	NA	NA	NA	NA	NA	1	3	0	0	NA	NA	0	NA	NA	NA	NA	5	2	NA	NA	NA	NA	NA	NA	NA	NA	NA	NA	NA	NA	NA
662	321	NA	NA	NA	NA	NA	NA	NA	NA	male	71	NA	NA	NA	NA	NA	NA	NA	NA	NA	NA	NA	NA	1	3	0	0	NA	NA	0	NA	NA	NA	NA	7	2	NA	NA	NA	NA	NA	NA	NA	NA	NA	NA	NA	NA	NA
663	322	NA	NA	NA	NA	NA	NA	NA	NA	male	64	NA	NA	NA	NA	NA	NA	NA	NA	NA	NA	NA	NA	1	4	0	0	NA	NA	0	NA	NA	NA	NA	4	2	NA	NA	NA	NA	NA	NA	NA	NA	NA	NA	NA	NA	NA
664	323	NA	NA	NA	NA	NA	NA	NA	NA	female	39	NA	NA	NA	NA	NA	NA	NA	NA	NA	NA	NA	NA	1	1	0	0	NA	NA	0	NA	NA	NA	NA	1	2	NA	NA	NA	NA	NA	NA	NA	NA	NA	NA	NA	NA	NA
665	324	NA	NA	NA	NA	NA	NA	NA	NA	female	38	NA	NA	NA	NA	NA	NA	NA	NA	NA	NA	NA	NA	1	1	0	0	NA	NA	0	NA	NA	NA	NA	1	2	NA	NA	NA	NA	NA	NA	NA	NA	NA	NA	NA	NA	NA
666	325	NA	NA	NA	NA	NA	NA	NA	NA	female	38	NA	NA	NA	NA	NA	NA	NA	NA	NA	NA	NA	NA	1	NA	NA	NA	NA	NA	NA	NA	NA	NA	NA	0	2	NA	NA	NA	NA	NA	NA	NA	NA	NA	NA	NA	NA	NA
667	326	NA	NA	NA	NA	NA	NA	NA	NA	female	56	NA	NA	NA	NA	NA	NA	NA	NA	NA	NA	NA	NA	1	NA	NA	NA	NA	NA	NA	NA	NA	NA	NA	0	2	NA	NA	NA	NA	NA	NA	NA	NA	NA	NA	NA	NA	NA
668	327	NA	NA	NA	NA	NA	NA	NA	NA	female	33	NA	NA	NA	NA	NA	NA	NA	NA	NA	NA	NA	NA	1	NA	NA	NA	NA	NA	NA	NA	NA	NA	NA	0	2	NA	NA	NA	NA	NA	NA	NA	NA	NA	NA	NA	NA	NA
669	328	NA	NA	NA	NA	NA	NA	NA	NA	female	45	NA	NA	NA	NA	NA	NA	NA	NA	NA	NA	NA	NA	1	1	3	1	NA	NA	0	NA	NA	NA	NA	9	2	NA	NA	NA	NA	NA	NA	NA	NA	NA	NA	NA	NA	NA
670	329	NA	NA	NA	NA	NA	NA	NA	NA	female	26	NA	NA	NA	NA	NA	NA	NA	NA	NA	NA	NA	NA	1	NA	NA	NA	NA	NA	NA	NA	NA	NA	NA	0	2	NA	NA	NA	NA	NA	NA	NA	NA	NA	NA	NA	NA	NA
671	330	NA	NA	NA	NA	NA	NA	NA	NA	male	60	NA	NA	NA	NA	NA	NA	NA	NA	NA	NA	NA	NA	1	4	1	0	NA	NA	4	NA	NA	NA	NA	21	2	NA	NA	NA	NA	NA	NA	NA	NA	NA	NA	NA	NA	NA
672	331	NA	NA	NA	NA	NA	NA	NA	NA	male	45	NA	NA	NA	NA	NA	NA	NA	NA	NA	NA	NA	NA	1	1	0	0	NA	NA	0	NA	NA	NA	NA	1	2	NA	NA	NA	NA	NA	NA	NA	NA	NA	NA	NA	NA	NA
673	332	NA	NA	NA	NA	NA	NA	NA	NA	female	74	NA	NA	NA	NA	NA	NA	NA	NA	NA	NA	NA	NA	1	1	0	0	NA	NA	0	NA	NA	NA	NA	1	2	NA	NA	NA	NA	NA	NA	NA	NA	NA	NA	NA	NA	NA
674	333	NA	NA	NA	NA	NA	NA	NA	NA	female	69	NA	NA	NA	NA	NA	NA	NA	NA	NA	NA	NA	NA	1	NA	NA	NA	NA	NA	NA	NA	NA	NA	NA	2	2	NA	NA	NA	NA	NA	NA	NA	NA	NA	NA	NA	NA	NA
675	334	NA	NA	NA	NA	NA	NA	NA	NA	female	72	NA	NA	NA	NA	NA	NA	NA	NA	NA	NA	NA	NA	1	NA	NA	NA	NA	NA	NA	NA	NA	NA	NA	2	2	NA	NA	NA	NA	NA	NA	NA	NA	NA	NA	NA	NA	NA
676	335	NA	NA	NA	NA	NA	NA	NA	NA	female	35	NA	NA	NA	NA	NA	NA	NA	NA	NA	NA	NA	NA	1	1	0	0	NA	NA	0	NA	NA	NA	NA	3	2	NA	NA	NA	NA	NA	NA	NA	NA	NA	NA	NA	NA	NA
679	338	NA	NA	NA	NA	NA	NA	NA	NA	male	73	NA	NA	NA	NA	NA	NA	NA	NA	NA	NA	NA	NA	1	4	4	4	NA	NA	4	NA	NA	NA	NA	32	2	NA	NA	NA	NA	NA	NA	NA	NA	NA	NA	NA	NA	NA
682	341	NA	NA	NA	NA	NA	NA	NA	NA	female	56	NA	NA	NA	NA	NA	NA	NA	NA	NA	NA	NA	NA	1	NA	NA	NA	NA	NA	NA	NA	NA	NA	NA	0	2	NA	NA	NA	NA	NA	NA	NA	NA	NA	NA	NA	NA	NA
683	342	NA	NA	NA	NA	NA	NA	NA	NA	male	44	NA	NA	NA	NA	NA	NA	NA	NA	NA	NA	NA	NA	1	3	1	3	NA	NA	0	NA	NA	NA	NA	13	2	NA	NA	NA	NA	NA	NA	NA	NA	NA	NA	NA	NA	NA
686	345	NA	NA	NA	NA	NA	NA	NA	NA	female	30	NA	NA	NA	NA	NA	NA	NA	NA	NA	NA	NA	NA	1	NA	NA	NA	NA	NA	NA	NA	NA	NA	NA	0	2	NA	NA	NA	NA	NA	NA	NA	NA	NA	NA	NA	NA	NA
687	346	NA	NA	NA	NA	NA	NA	NA	NA	female	50	NA	NA	NA	NA	NA	NA	NA	NA	NA	NA	NA	NA	1	4	0	0	NA	NA	0	NA	NA	NA	NA	8	2	NA	NA	NA	NA	NA	NA	NA	NA	NA	NA	NA	NA	NA
688	347	NA	NA	NA	NA	NA	NA	NA	NA	male	61	NA	NA	NA	NA	NA	NA	NA	NA	NA	NA	NA	NA	1	NA	NA	NA	NA	NA	NA	NA	NA	NA	NA	0	2	NA	NA	NA	NA	NA	NA	NA	NA	NA	NA	NA	NA	NA
689	348	NA	NA	NA	NA	NA	NA	NA	NA	female	61	NA	NA	NA	NA	NA	NA	NA	NA	NA	NA	NA	NA	1	NA	NA	NA	NA	NA	NA	NA	NA	NA	NA	0	2	NA	NA	NA	NA	NA	NA	NA	NA	NA	NA	NA	NA	NA
690	349	NA	NA	NA	NA	NA	NA	NA	NA	male	72	NA	NA	NA	NA	NA	NA	NA	NA	NA	NA	NA	NA	1	2	0	0	NA	NA	4	NA	NA	NA	NA	8	2	NA	NA	NA	NA	NA	NA	NA	NA	NA	NA	NA	NA	NA
691	350	NA	NA	NA	NA	NA	NA	NA	NA	female	58	NA	NA	NA	NA	NA	NA	NA	NA	NA	NA	NA	NA	1	NA	NA	NA	NA	NA	NA	NA	NA	NA	NA	0	2	NA	NA	NA	NA	NA	NA	NA	NA	NA	NA	NA	NA	NA
692	351	NA	NA	NA	NA	NA	NA	NA	NA	female	47	NA	NA	NA	NA	NA	NA	NA	NA	NA	NA	NA	NA	1	1	0	0	NA	NA	0	NA	NA	NA	NA	1	2	NA	NA	NA	NA	NA	NA	NA	NA	NA	NA	NA	NA	NA
695	354	NA	NA	NA	NA	NA	NA	NA	NA	female	67	NA	NA	NA	NA	NA	NA	NA	NA	NA	NA	NA	NA	1	2	0	0	NA	NA	0	NA	NA	NA	NA	2	2	NA	NA	NA	NA	NA	NA	NA	NA	NA	NA	NA	NA	NA
698	357	NA	NA	NA	NA	NA	NA	NA	NA	male	42	NA	NA	NA	NA	NA	NA	NA	NA	NA	NA	NA	NA	1	4	4	0	NA	NA	0	NA	NA	NA	NA	18	2	NA	NA	NA	NA	NA	NA	NA	NA	NA	NA	NA	NA	NA
699	358	NA	NA	NA	NA	NA	NA	NA	NA	male	77	NA	NA	NA	NA	NA	NA	NA	NA	NA	NA	NA	NA	1	NA	NA	NA	NA	NA	NA	NA	NA	NA	NA	0	2	NA	NA	NA	NA	NA	NA	NA	NA	NA	NA	NA	NA	NA
703	362	NA	NA	NA	NA	NA	NA	NA	NA	male	22	NA	NA	NA	NA	NA	NA	NA	NA	NA	NA	NA	NA	1	3	1	0	NA	NA	0	NA	NA	NA	NA	7	2	NA	NA	NA	NA	NA	NA	NA	NA	NA	NA	NA	NA	NA
704	363	NA	NA	NA	NA	NA	NA	NA	NA	male	27	NA	NA	NA	NA	NA	NA	NA	NA	NA	NA	NA	NA	1	4	2	3	NA	NA	1	NA	NA	NA	NA	17	2	NA	NA	NA	NA	NA	NA	NA	NA	NA	NA	NA	NA	NA
705	364	NA	NA	NA	NA	NA	NA	NA	NA	female	23	NA	NA	NA	NA	NA	NA	NA	NA	NA	NA	NA	NA	1	4	3	4	NA	NA	4	NA	NA	NA	NA	19	2	NA	NA	NA	NA	NA	NA	NA	NA	NA	NA	NA	NA	NA
706	365	NA	NA	NA	NA	NA	NA	NA	NA	female	54	NA	NA	NA	NA	NA	NA	NA	NA	NA	NA	NA	NA	1	NA	NA	NA	NA	NA	NA	NA	NA	NA	NA	0	2	NA	NA	NA	NA	NA	NA	NA	NA	NA	NA	NA	NA	NA
708	367	NA	NA	NA	NA	NA	NA	NA	NA	female	39	NA	NA	NA	NA	NA	NA	NA	NA	NA	NA	NA	NA	1	NA	NA	NA	NA	NA	NA	NA	NA	NA	NA	0	2	NA	NA	NA	NA	NA	NA	NA	NA	NA	NA	NA	NA	NA
709	368	NA	NA	NA	NA	NA	NA	NA	NA	female	29	NA	NA	NA	NA	NA	NA	NA	NA	NA	NA	NA	NA	1	NA	NA	NA	NA	NA	NA	NA	NA	NA	NA	0	2	NA	NA	NA	NA	NA	NA	NA	NA	NA	NA	NA	NA	NA
712	371	NA	NA	NA	NA	NA	NA	NA	NA	female	31	NA	NA	NA	NA	NA	NA	NA	NA	NA	NA	NA	NA	1	NA	NA	NA	NA	NA	NA	NA	NA	NA	NA	0	2	NA	NA	NA	NA	NA	NA	NA	NA	NA	NA	NA	NA	NA
713	372	NA	NA	NA	NA	NA	NA	NA	NA	male	33	NA	NA	NA	NA	NA	NA	NA	NA	NA	NA	NA	NA	1	NA	NA	NA	NA	NA	NA	NA	NA	NA	NA	2	2	NA	NA	NA	NA	NA	NA	NA	NA	NA	NA	NA	NA	NA
714	373	NA	NA	NA	NA	NA	NA	NA	NA	female	47	NA	NA	NA	NA	NA	NA	NA	NA	NA	NA	NA	NA	1	3	0	0	NA	NA	0	NA	NA	NA	NA	3	2	NA	NA	NA	NA	NA	NA	NA	NA	NA	NA	NA	NA	NA
715	374	NA	NA	NA	NA	NA	NA	NA	NA	female	20	NA	NA	NA	NA	NA	NA	NA	NA	NA	NA	NA	NA	1	NA	NA	NA	NA	NA	NA	NA	NA	NA	NA	0	2	NA	NA	NA	NA	NA	NA	NA	NA	NA	NA	NA	NA	NA
719	378	NA	NA	NA	NA	NA	NA	NA	NA	female	55	NA	NA	NA	NA	NA	NA	NA	NA	NA	NA	NA	NA	1	2	0	0	NA	NA	0	NA	NA	NA	NA	2	2	NA	NA	NA	NA	NA	NA	NA	NA	NA	NA	NA	NA	NA
720	379	NA	NA	NA	NA	NA	NA	NA	NA	female	47	NA	NA	NA	NA	NA	NA	NA	NA	NA	NA	NA	NA	1	NA	NA	NA	NA	NA	NA	NA	NA	NA	NA	0	2	NA	NA	NA	NA	NA	NA	NA	NA	NA	NA	NA	NA	NA
721	380	NA	NA	NA	NA	NA	NA	NA	NA	female	28	NA	NA	NA	NA	NA	NA	NA	NA	NA	NA	NA	NA	1	1	0	0	NA	NA	0	NA	NA	NA	NA	1	2	NA	NA	NA	NA	NA	NA	NA	NA	NA	NA	NA	NA	NA
723	382	NA	NA	NA	NA	NA	NA	NA	NA	female	66	NA	NA	NA	NA	NA	NA	NA	NA	NA	NA	NA	NA	1	4	4	2	NA	NA	0	NA	NA	NA	NA	22	2	NA	NA	NA	NA	NA	NA	NA	NA	NA	NA	NA	NA	NA
724	383	NA	NA	NA	NA	NA	NA	NA	NA	female	40	NA	NA	NA	NA	NA	NA	NA	NA	NA	NA	NA	NA	1	2	0	0	NA	NA	0	NA	NA	NA	NA	6	2	NA	NA	NA	NA	NA	NA	NA	NA	NA	NA	NA	NA	NA
725	384	NA	NA	NA	NA	NA	NA	NA	NA	female	37	NA	NA	NA	NA	NA	NA	NA	NA	NA	NA	NA	NA	1	1	1	1	NA	NA	0	NA	NA	NA	NA	6	2	NA	NA	NA	NA	NA	NA	NA	NA	NA	NA	NA	NA	NA
727	386	NA	NA	NA	NA	NA	NA	NA	NA	male	25	NA	NA	NA	NA	NA	NA	NA	NA	NA	NA	NA	NA	1	NA	NA	NA	NA	NA	NA	NA	NA	NA	NA	0	2	NA	NA	NA	NA	NA	NA	NA	NA	NA	NA	NA	NA	NA
728	387	NA	NA	NA	NA	NA	NA	NA	NA	female	51	NA	NA	NA	NA	NA	NA	NA	NA	NA	NA	NA	NA	1	NA	NA	NA	NA	NA	NA	NA	NA	NA	NA	0	2	NA	NA	NA	NA	NA	NA	NA	NA	NA	NA	NA	NA	NA
729	388	NA	NA	NA	NA	NA	NA	NA	NA	female	25	NA	NA	NA	NA	NA	NA	NA	NA	NA	NA	NA	NA	1	1	0	0	NA	NA	0	NA	NA	NA	NA	1	2	NA	NA	NA	NA	NA	NA	NA	NA	NA	NA	NA	NA	NA
730	389	NA	NA	NA	NA	NA	NA	NA	NA	male	42	NA	NA	NA	NA	NA	NA	NA	NA	NA	NA	NA	NA	1	1	1	0	NA	NA	1	NA	NA	NA	NA	2	2	NA	NA	NA	NA	NA	NA	NA	NA	NA	NA	NA	NA	NA
732	391	NA	NA	NA	NA	NA	NA	NA	NA	female	34	NA	NA	NA	NA	NA	NA	NA	NA	NA	NA	NA	NA	1	NA	NA	NA	NA	NA	NA	NA	NA	NA	NA	0	2	NA	NA	NA	NA	NA	NA	NA	NA	NA	NA	NA	NA	NA
733	392	NA	NA	NA	NA	NA	NA	NA	NA	male	51	NA	NA	NA	NA	NA	NA	NA	NA	NA	NA	NA	NA	1	NA	NA	NA	NA	NA	NA	NA	NA	NA	NA	0	2	NA	NA	NA	NA	NA	NA	NA	NA	NA	NA	NA	NA	NA
734	393	NA	NA	NA	NA	NA	NA	NA	NA	female	43	NA	NA	NA	NA	NA	NA	NA	NA	NA	NA	NA	NA	1	3	3	3	NA	NA	0	NA	NA	NA	NA	17	2	NA	NA	NA	NA	NA	NA	NA	NA	NA	NA	NA	NA	NA
736	395	NA	NA	NA	NA	NA	NA	NA	NA	female	53	NA	NA	NA	NA	NA	NA	NA	NA	NA	NA	NA	NA	1	NA	NA	NA	NA	NA	NA	NA	NA	NA	NA	0	2	NA	NA	NA	NA	NA	NA	NA	NA	NA	NA	NA	NA	NA
737	396	NA	NA	NA	NA	NA	NA	NA	NA	female	55	NA	NA	NA	NA	NA	NA	NA	NA	NA	NA	NA	NA	1	NA	NA	NA	NA	NA	NA	NA	NA	NA	NA	0	2	NA	NA	NA	NA	NA	NA	NA	NA	NA	NA	NA	NA	NA
738	397	NA	NA	NA	NA	NA	NA	NA	NA	female	44	NA	NA	NA	NA	NA	NA	NA	NA	NA	NA	NA	NA	1	1	0	0	NA	NA	0	NA	NA	NA	NA	1	2	NA	NA	NA	NA	NA	NA	NA	NA	NA	NA	NA	NA	NA
742	401	NA	NA	NA	NA	NA	NA	NA	NA	male	20	NA	NA	NA	NA	NA	NA	NA	NA	NA	NA	NA	NA	1	2	1	0	NA	NA	0	NA	NA	NA	NA	17	2	NA	NA	NA	NA	NA	NA	NA	NA	NA	NA	NA	NA	NA
743	402	NA	NA	NA	NA	NA	NA	NA	NA	male	29	NA	NA	NA	NA	NA	NA	NA	NA	NA	NA	NA	NA	1	NA	NA	NA	NA	NA	NA	NA	NA	NA	NA	0	2	NA	NA	NA	NA	NA	NA	NA	NA	NA	NA	NA	NA	NA
744	403	NA	NA	NA	NA	NA	NA	NA	NA	female	56	NA	NA	NA	NA	NA	NA	NA	NA	NA	NA	NA	NA	1	2	0	0	NA	NA	0	NA	NA	NA	NA	6	2	NA	NA	NA	NA	NA	NA	NA	NA	NA	NA	NA	NA	NA
745	404	NA	NA	NA	NA	NA	NA	NA	NA	female	22	NA	NA	NA	NA	NA	NA	NA	NA	NA	NA	NA	NA	1	1	0	0	NA	NA	0	NA	NA	NA	NA	1	2	NA	NA	NA	NA	NA	NA	NA	NA	NA	NA	NA	NA	NA
746	405	NA	NA	NA	NA	NA	NA	NA	NA	female	45	NA	NA	NA	NA	NA	NA	NA	NA	NA	NA	NA	NA	1	2	0	0	NA	NA	0	NA	NA	NA	NA	3	2	NA	NA	NA	NA	NA	NA	NA	NA	NA	NA	NA	NA	NA
747	406	NA	NA	NA	NA	NA	NA	NA	NA	female	27	NA	NA	NA	NA	NA	NA	NA	NA	NA	NA	NA	NA	1	1	0	0	NA	NA	0	NA	NA	NA	NA	5	2	NA	NA	NA	NA	NA	NA	NA	NA	NA	NA	NA	NA	NA
748	407	NA	NA	NA	NA	NA	NA	NA	NA	female	503	NA	NA	NA	NA	NA	NA	NA	NA	NA	NA	NA	NA	1	NA	NA	NA	NA	NA	NA	NA	NA	NA	NA	0	2	NA	NA	NA	NA	NA	NA	NA	NA	NA	NA	NA	NA	NA
749	408	NA	NA	NA	NA	NA	NA	NA	NA	male	30	NA	NA	NA	NA	NA	NA	NA	NA	NA	NA	NA	NA	1	4	3	4	NA	NA	3	NA	NA	NA	NA	17	2	NA	NA	NA	NA	NA	NA	NA	NA	NA	NA	NA	NA	NA
750	409	NA	NA	NA	NA	NA	NA	NA	NA	male	43	NA	NA	NA	NA	NA	NA	NA	NA	NA	NA	NA	NA	1	3	0	0	NA	NA	0	NA	NA	NA	NA	5	2	NA	NA	NA	NA	NA	NA	NA	NA	NA	NA	NA	NA	NA
751	410	NA	NA	NA	NA	NA	NA	NA	NA	female	55	NA	NA	NA	NA	NA	NA	NA	NA	NA	NA	NA	NA	1	NA	NA	NA	NA	NA	NA	NA	NA	NA	NA	0	2	NA	NA	NA	NA	NA	NA	NA	NA	NA	NA	NA	NA	NA
753	412	NA	NA	NA	NA	NA	NA	NA	NA	female	40	NA	NA	NA	NA	NA	NA	NA	NA	NA	NA	NA	NA	1	2	0	0	NA	NA	0	NA	NA	NA	NA	2	2	NA	NA	NA	NA	NA	NA	NA	NA	NA	NA	NA	NA	NA
754	413	NA	NA	NA	NA	NA	NA	NA	NA	male	62	NA	NA	NA	NA	NA	NA	NA	NA	NA	NA	NA	NA	1	0	0	0	NA	NA	0	NA	NA	NA	NA	2	2	NA	NA	NA	NA	NA	NA	NA	NA	NA	NA	NA	NA	NA
756	415	NA	NA	NA	NA	NA	NA	NA	NA	male	35	NA	NA	NA	NA	NA	NA	NA	NA	NA	NA	NA	NA	1	3	1	0	NA	NA	1	NA	NA	NA	NA	15	2	NA	NA	NA	NA	NA	NA	NA	NA	NA	NA	NA	NA	NA
757	416	NA	NA	NA	NA	NA	NA	NA	NA	female	55	NA	NA	NA	NA	NA	NA	NA	NA	NA	NA	NA	NA	1	NA	NA	NA	NA	NA	NA	NA	NA	NA	NA	0	2	NA	NA	NA	NA	NA	NA	NA	NA	NA	NA	NA	NA	NA
758	417	NA	NA	NA	NA	NA	NA	NA	NA	female	41	NA	NA	NA	NA	NA	NA	NA	NA	NA	NA	NA	NA	1	NA	NA	NA	NA	NA	NA	NA	NA	NA	NA	0	2	NA	NA	NA	NA	NA	NA	NA	NA	NA	NA	NA	NA	NA
759	418	NA	NA	NA	NA	NA	NA	NA	NA	male	30	NA	NA	NA	NA	NA	NA	NA	NA	NA	NA	NA	NA	1	1	1	2	NA	NA	0	NA	NA	NA	NA	4	2	NA	NA	NA	NA	NA	NA	NA	NA	NA	NA	NA	NA	NA
761	420	NA	NA	NA	NA	NA	NA	NA	NA	male	41	NA	NA	NA	NA	NA	NA	NA	NA	NA	NA	NA	NA	1	NA	NA	NA	NA	NA	NA	NA	NA	NA	NA	0	2	NA	NA	NA	NA	NA	NA	NA	NA	NA	NA	NA	NA	NA
762	421	NA	NA	NA	NA	NA	NA	NA	NA	female	27	NA	NA	NA	NA	NA	NA	NA	NA	NA	NA	NA	NA	1	3	0	1	NA	NA	0	NA	NA	NA	NA	6	2	NA	NA	NA	NA	NA	NA	NA	NA	NA	NA	NA	NA	NA
763	422	NA	NA	NA	NA	NA	NA	NA	NA	male	37	NA	NA	NA	NA	NA	NA	NA	NA	NA	NA	NA	NA	1	2	1	0	NA	NA	0	NA	NA	NA	NA	10	2	NA	NA	NA	NA	NA	NA	NA	NA	NA	NA	NA	NA	NA
764	423	NA	NA	NA	NA	NA	NA	NA	NA	female	23	NA	NA	NA	NA	NA	NA	NA	NA	NA	NA	NA	NA	1	1	0	0	NA	NA	0	NA	NA	NA	NA	1	2	NA	NA	NA	NA	NA	NA	NA	NA	NA	NA	NA	NA	NA
765	424	NA	NA	NA	NA	NA	NA	NA	NA	male	45	NA	NA	NA	NA	NA	NA	NA	NA	NA	NA	NA	NA	1	1	0	0	NA	NA	0	NA	NA	NA	NA	3	2	NA	NA	NA	NA	NA	NA	NA	NA	NA	NA	NA	NA	NA
766	425	NA	NA	NA	NA	NA	NA	NA	NA	female	29	NA	NA	NA	NA	NA	NA	NA	NA	NA	NA	NA	NA	1	NA	NA	NA	NA	NA	NA	NA	NA	NA	NA	0	2	NA	NA	NA	NA	NA	NA	NA	NA	NA	NA	NA	NA	NA
767	426	NA	NA	NA	NA	NA	NA	NA	NA	female	38	NA	NA	NA	NA	NA	NA	NA	NA	NA	NA	NA	NA	1	1	0	0	NA	NA	0	NA	NA	NA	NA	1	2	NA	NA	NA	NA	NA	NA	NA	NA	NA	NA	NA	NA	NA
768	427	NA	NA	NA	NA	NA	NA	NA	NA	male	61	NA	NA	NA	NA	NA	NA	NA	NA	NA	NA	NA	NA	1	1	1	0	NA	NA	0	NA	NA	NA	NA	8	2	NA	NA	NA	NA	NA	NA	NA	NA	NA	NA	NA	NA	NA
769	428	NA	NA	NA	NA	NA	NA	NA	NA	female	56	NA	NA	NA	NA	NA	NA	NA	NA	NA	NA	NA	NA	1	NA	NA	NA	NA	NA	NA	NA	NA	NA	NA	0	2	NA	NA	NA	NA	NA	NA	NA	NA	NA	NA	NA	NA	NA
770	429	NA	NA	NA	NA	NA	NA	NA	NA	male	52	NA	NA	NA	NA	NA	NA	NA	NA	NA	NA	NA	NA	1	1	1	0	NA	NA	0	NA	NA	NA	NA	6	2	NA	NA	NA	NA	NA	NA	NA	NA	NA	NA	NA	NA	NA
772	431	NA	NA	NA	NA	NA	NA	NA	NA	female	49	NA	NA	NA	NA	NA	NA	NA	NA	NA	NA	NA	NA	1	3	0	0	NA	NA	0	NA	NA	NA	NA	5	2	NA	NA	NA	NA	NA	NA	NA	NA	NA	NA	NA	NA	NA
773	432	NA	NA	NA	NA	NA	NA	NA	NA	male	55	NA	NA	NA	NA	NA	NA	NA	NA	NA	NA	NA	NA	1	3	1	0	NA	NA	3	NA	NA	NA	NA	15	2	NA	NA	NA	NA	NA	NA	NA	NA	NA	NA	NA	NA	NA
776	435	NA	NA	NA	NA	NA	NA	NA	NA	female	56	NA	NA	NA	NA	NA	NA	NA	NA	NA	NA	NA	NA	1	1	0	0	NA	NA	0	NA	NA	NA	NA	1	2	NA	NA	NA	NA	NA	NA	NA	NA	NA	NA	NA	NA	NA
777	436	NA	NA	NA	NA	NA	NA	NA	NA	female	63	NA	NA	NA	NA	NA	NA	NA	NA	NA	NA	NA	NA	1	4	0	0	NA	NA	0	NA	NA	NA	NA	6	2	NA	NA	NA	NA	NA	NA	NA	NA	NA	NA	NA	NA	NA
778	437	NA	NA	NA	NA	NA	NA	NA	NA	male	35	NA	NA	NA	NA	NA	NA	NA	NA	NA	NA	NA	NA	1	NA	NA	NA	NA	NA	NA	NA	NA	NA	NA	0	2	NA	NA	NA	NA	NA	NA	NA	NA	NA	NA	NA	NA	NA
780	439	NA	NA	NA	NA	NA	NA	NA	NA	male	43	NA	NA	NA	NA	NA	NA	NA	NA	NA	NA	NA	NA	1	4	1	0	NA	NA	0	NA	NA	NA	NA	14	2	NA	NA	NA	NA	NA	NA	NA	NA	NA	NA	NA	NA	NA
781	440	NA	NA	NA	NA	NA	NA	NA	NA	male	40	NA	NA	NA	NA	NA	NA	NA	NA	NA	NA	NA	NA	1	1	0	0	NA	NA	0	NA	NA	NA	NA	1	2	NA	NA	NA	NA	NA	NA	NA	NA	NA	NA	NA	NA	NA
783	442	NA	NA	NA	NA	NA	NA	NA	NA	male	57	NA	NA	NA	NA	NA	NA	NA	NA	NA	NA	NA	NA	1	NA	NA	NA	NA	NA	NA	NA	NA	NA	NA	2	2	NA	NA	NA	NA	NA	NA	NA	NA	NA	NA	NA	NA	NA
786	445	NA	NA	NA	NA	NA	NA	NA	NA	female	42	NA	NA	NA	NA	NA	NA	NA	NA	NA	NA	NA	NA	1	3	0	0	NA	NA	0	NA	NA	NA	NA	7	2	NA	NA	NA	NA	NA	NA	NA	NA	NA	NA	NA	NA	NA
788	447	NA	NA	NA	NA	NA	NA	NA	NA	female	43	NA	NA	NA	NA	NA	NA	NA	NA	NA	NA	NA	NA	1	3	2	3	NA	NA	0	NA	NA	NA	NA	10	2	NA	NA	NA	NA	NA	NA	NA	NA	NA	NA	NA	NA	NA
789	448	NA	NA	NA	NA	NA	NA	NA	NA	male	35	NA	NA	NA	NA	NA	NA	NA	NA	NA	NA	NA	NA	1	4	1	2	NA	NA	0	NA	NA	NA	NA	11	2	NA	NA	NA	NA	NA	NA	NA	NA	NA	NA	NA	NA	NA
790	449	NA	NA	NA	NA	NA	NA	NA	NA	male	40	NA	NA	NA	NA	NA	NA	NA	NA	NA	NA	NA	NA	1	3	1	0	NA	NA	2	NA	NA	NA	NA	8	2	NA	NA	NA	NA	NA	NA	NA	NA	NA	NA	NA	NA	NA
791	450	NA	NA	NA	NA	NA	NA	NA	NA	male	41	NA	NA	NA	NA	NA	NA	NA	NA	NA	NA	NA	NA	1	NA	NA	NA	NA	NA	NA	NA	NA	NA	NA	0	2	NA	NA	NA	NA	NA	NA	NA	NA	NA	NA	NA	NA	NA
793	452	NA	NA	NA	NA	NA	NA	NA	NA	female	36	NA	NA	NA	NA	NA	NA	NA	NA	NA	NA	NA	NA	1	4	1	0	NA	NA	0	NA	NA	NA	NA	11	2	NA	NA	NA	NA	NA	NA	NA	NA	NA	NA	NA	NA	NA
794	453	NA	NA	NA	NA	NA	NA	NA	NA	female	30	NA	NA	NA	NA	NA	NA	NA	NA	NA	NA	NA	NA	1	4	1	2	NA	NA	0	NA	NA	NA	NA	17	2	NA	NA	NA	NA	NA	NA	NA	NA	NA	NA	NA	NA	NA
795	454	NA	NA	NA	NA	NA	NA	NA	NA	female	40	NA	NA	NA	NA	NA	NA	NA	NA	NA	NA	NA	NA	1	3	0	0	NA	NA	0	NA	NA	NA	NA	16	2	NA	NA	NA	NA	NA	NA	NA	NA	NA	NA	NA	NA	NA
796	455	NA	NA	NA	NA	NA	NA	NA	NA	female	35	NA	NA	NA	NA	NA	NA	NA	NA	NA	NA	NA	NA	1	NA	NA	NA	NA	NA	NA	NA	NA	NA	NA	0	2	NA	NA	NA	NA	NA	NA	NA	NA	NA	NA	NA	NA	NA
797	456	NA	NA	NA	NA	NA	NA	NA	NA	male	66	NA	NA	NA	NA	NA	NA	NA	NA	NA	NA	NA	NA	1	NA	NA	NA	NA	NA	NA	NA	NA	NA	NA	0	2	NA	NA	NA	NA	NA	NA	NA	NA	NA	NA	NA	NA	NA
798	457	NA	NA	NA	NA	NA	NA	NA	NA	female	32	NA	NA	NA	NA	NA	NA	NA	NA	NA	NA	NA	NA	1	4	0	0	NA	NA	0	NA	NA	NA	NA	4	2	NA	NA	NA	NA	NA	NA	NA	NA	NA	NA	NA	NA	NA
799	458	NA	NA	NA	NA	NA	NA	NA	NA	male	24	NA	NA	NA	NA	NA	NA	NA	NA	NA	NA	NA	NA	1	2	0	0	NA	NA	0	NA	NA	NA	NA	4	2	NA	NA	NA	NA	NA	NA	NA	NA	NA	NA	NA	NA	NA
803	462	NA	NA	NA	NA	NA	NA	NA	NA	male	60	NA	NA	NA	NA	NA	NA	NA	NA	NA	NA	NA	NA	1	NA	NA	NA	NA	NA	NA	NA	NA	NA	NA	2	2	NA	NA	NA	NA	NA	NA	NA	NA	NA	NA	NA	NA	NA
804	463	NA	NA	NA	NA	NA	NA	NA	NA	female	34	NA	NA	NA	NA	NA	NA	NA	NA	NA	NA	NA	NA	1	NA	NA	NA	NA	NA	NA	NA	NA	NA	NA	0	2	NA	NA	NA	NA	NA	NA	NA	NA	NA	NA	NA	NA	NA
805	464	NA	NA	NA	NA	NA	NA	NA	NA	male	41	NA	NA	NA	NA	NA	NA	NA	NA	NA	NA	NA	NA	1	2	0	0	NA	NA	0	NA	NA	NA	NA	2	2	NA	NA	NA	NA	NA	NA	NA	NA	NA	NA	NA	NA	NA
806	465	NA	NA	NA	NA	NA	NA	NA	NA	male	50	NA	NA	NA	NA	NA	NA	NA	NA	NA	NA	NA	NA	1	1	1	1	NA	NA	0	NA	NA	NA	NA	7	2	NA	NA	NA	NA	NA	NA	NA	NA	NA	NA	NA	NA	NA
807	466	NA	NA	NA	NA	NA	NA	NA	NA	male	59	NA	NA	NA	NA	NA	NA	NA	NA	NA	NA	NA	NA	1	3	0	0	NA	NA	0	NA	NA	NA	NA	5	2	NA	NA	NA	NA	NA	NA	NA	NA	NA	NA	NA	NA	NA
808	467	NA	NA	NA	NA	NA	NA	NA	NA	male	67	NA	NA	NA	NA	NA	NA	NA	NA	NA	NA	NA	NA	1	3	0	0	NA	NA	0	NA	NA	NA	NA	4	2	NA	NA	NA	NA	NA	NA	NA	NA	NA	NA	NA	NA	NA
809	468	NA	NA	NA	NA	NA	NA	NA	NA	female	42	NA	NA	NA	NA	NA	NA	NA	NA	NA	NA	NA	NA	1	NA	NA	NA	NA	NA	NA	NA	NA	NA	NA	0	2	NA	NA	NA	NA	NA	NA	NA	NA	NA	NA	NA	NA	NA
810	469	NA	NA	NA	NA	NA	NA	NA	NA	female	29	NA	NA	NA	NA	NA	NA	NA	NA	NA	NA	NA	NA	1	NA	NA	NA	NA	NA	NA	NA	NA	NA	NA	0	2	NA	NA	NA	NA	NA	NA	NA	NA	NA	NA	NA	NA	NA
811	470	NA	NA	NA	NA	NA	NA	NA	NA	female	21	NA	NA	NA	NA	NA	NA	NA	NA	NA	NA	NA	NA	1	0	0	0	NA	NA	0	NA	NA	NA	NA	1	2	NA	NA	NA	NA	NA	NA	NA	NA	NA	NA	NA	NA	NA
814	473	NA	NA	NA	NA	NA	NA	NA	NA	male	32	NA	NA	NA	NA	NA	NA	NA	NA	NA	NA	NA	NA	1	2	1	0	NA	NA	0	NA	NA	NA	NA	12	2	NA	NA	NA	NA	NA	NA	NA	NA	NA	NA	NA	NA	NA
816	475	NA	NA	NA	NA	NA	NA	NA	NA	female	58	NA	NA	NA	NA	NA	NA	NA	NA	NA	NA	NA	NA	1	NA	NA	NA	NA	NA	NA	NA	NA	NA	NA	0	2	NA	NA	NA	NA	NA	NA	NA	NA	NA	NA	NA	NA	NA
817	476	NA	NA	NA	NA	NA	NA	NA	NA	female	35	NA	NA	NA	NA	NA	NA	NA	NA	NA	NA	NA	NA	1	NA	NA	NA	NA	NA	NA	NA	NA	NA	NA	0	2	NA	NA	NA	NA	NA	NA	NA	NA	NA	NA	NA	NA	NA
819	478	NA	NA	NA	NA	NA	NA	NA	NA	female	33	NA	NA	NA	NA	NA	NA	NA	NA	NA	NA	NA	NA	1	3	1	2	NA	NA	0	NA	NA	NA	NA	12	2	NA	NA	NA	NA	NA	NA	NA	NA	NA	NA	NA	NA	NA
820	479	NA	NA	NA	NA	NA	NA	NA	NA	male	29	NA	NA	NA	NA	NA	NA	NA	NA	NA	NA	NA	NA	1	2	0	0	NA	NA	0	NA	NA	NA	NA	5	2	NA	NA	NA	NA	NA	NA	NA	NA	NA	NA	NA	NA	NA
821	480	NA	NA	NA	NA	NA	NA	NA	NA	female	19	NA	NA	NA	NA	NA	NA	NA	NA	NA	NA	NA	NA	1	1	0	0	NA	NA	0	NA	NA	NA	NA	2	2	NA	NA	NA	NA	NA	NA	NA	NA	NA	NA	NA	NA	NA
822	481	NA	NA	NA	NA	NA	NA	NA	NA	female	25	NA	NA	NA	NA	NA	NA	NA	NA	NA	NA	NA	NA	1	3	1	2	NA	NA	2	NA	NA	NA	NA	12	2	NA	NA	NA	NA	NA	NA	NA	NA	NA	NA	NA	NA	NA
824	483	NA	NA	NA	NA	NA	NA	NA	NA	female	59	NA	NA	NA	NA	NA	NA	NA	NA	NA	NA	NA	NA	1	1	0	0	NA	NA	0	NA	NA	NA	NA	1	2	NA	NA	NA	NA	NA	NA	NA	NA	NA	NA	NA	NA	NA
825	484	NA	NA	NA	NA	NA	NA	NA	NA	female	56	NA	NA	NA	NA	NA	NA	NA	NA	NA	NA	NA	NA	1	2	1	0	NA	NA	0	NA	NA	NA	NA	7	2	NA	NA	NA	NA	NA	NA	NA	NA	NA	NA	NA	NA	NA
826	485	NA	NA	NA	NA	NA	NA	NA	NA	female	57	NA	NA	NA	NA	NA	NA	NA	NA	NA	NA	NA	NA	1	NA	NA	NA	NA	NA	NA	NA	NA	NA	NA	2	2	NA	NA	NA	NA	NA	NA	NA	NA	NA	NA	NA	NA	NA
827	486	NA	NA	NA	NA	NA	NA	NA	NA	male	30	NA	NA	NA	NA	NA	NA	NA	NA	NA	NA	NA	NA	1	3	1	2	NA	NA	0	NA	NA	NA	NA	14	2	NA	NA	NA	NA	NA	NA	NA	NA	NA	NA	NA	NA	NA
828	487	NA	NA	NA	NA	NA	NA	NA	NA	male	54	NA	NA	NA	NA	NA	NA	NA	NA	NA	NA	NA	NA	1	2	0	0	NA	NA	0	NA	NA	NA	NA	4	2	NA	NA	NA	NA	NA	NA	NA	NA	NA	NA	NA	NA	NA
829	488	NA	NA	NA	NA	NA	NA	NA	NA	female	33	NA	NA	NA	NA	NA	NA	NA	NA	NA	NA	NA	NA	1	4	1	2	NA	NA	0	NA	NA	NA	NA	17	2	NA	NA	NA	NA	NA	NA	NA	NA	NA	NA	NA	NA	NA
830	489	NA	NA	NA	NA	NA	NA	NA	NA	male	42	NA	NA	NA	NA	NA	NA	NA	NA	NA	NA	NA	NA	1	NA	NA	NA	NA	NA	NA	NA	NA	NA	NA	0	2	NA	NA	NA	NA	NA	NA	NA	NA	NA	NA	NA	NA	NA
831	490	NA	NA	NA	NA	NA	NA	NA	NA	male	22	NA	NA	NA	NA	NA	NA	NA	NA	NA	NA	NA	NA	1	4	2	2	NA	NA	2	NA	NA	NA	NA	24	2	NA	NA	NA	NA	NA	NA	NA	NA	NA	NA	NA	NA	NA
832	491	NA	NA	NA	NA	NA	NA	NA	NA	female	35	NA	NA	NA	NA	NA	NA	NA	NA	NA	NA	NA	NA	1	NA	NA	NA	NA	NA	NA	NA	NA	NA	NA	4	2	NA	NA	NA	NA	NA	NA	NA	NA	NA	NA	NA	NA	NA
834	493	NA	NA	NA	NA	NA	NA	NA	NA	female	24	NA	NA	NA	NA	NA	NA	NA	NA	NA	NA	NA	NA	1	2	1	0	NA	NA	0	NA	NA	NA	NA	3	2	NA	NA	NA	NA	NA	NA	NA	NA	NA	NA	NA	NA	NA
835	494	NA	NA	NA	NA	NA	NA	NA	NA	female	23	NA	NA	NA	NA	NA	NA	NA	NA	NA	NA	NA	NA	1	2	0	0	NA	NA	0	NA	NA	NA	NA	6	2	NA	NA	NA	NA	NA	NA	NA	NA	NA	NA	NA	NA	NA
837	496	NA	NA	NA	NA	NA	NA	NA	NA	female	36	NA	NA	NA	NA	NA	NA	NA	NA	NA	NA	NA	NA	1	4	4	4	NA	NA	3	NA	NA	NA	NA	28	2	NA	NA	NA	NA	NA	NA	NA	NA	NA	NA	NA	NA	NA
839	498	NA	NA	NA	NA	NA	NA	NA	NA	male	33	NA	NA	NA	NA	NA	NA	NA	NA	NA	NA	NA	NA	1	NA	NA	NA	NA	NA	NA	NA	NA	NA	NA	0	2	NA	NA	NA	NA	NA	NA	NA	NA	NA	NA	NA	NA	NA
840	499	NA	NA	NA	NA	NA	NA	NA	NA	female	29	NA	NA	NA	NA	NA	NA	NA	NA	NA	NA	NA	NA	1	NA	NA	NA	NA	NA	NA	NA	NA	NA	NA	0	2	NA	NA	NA	NA	NA	NA	NA	NA	NA	NA	NA	NA	NA
[truncated: 256 more columns]
